# Supplementary material
Source: MDPI journal article supplement (https://www.mdpi.com/2673-401X/5/2/3)
Supplement: s1 [file s1]

# Supporting Information of

## **Supramolecular Catalysis with Chiral Mono- and Bis- (Thio)Urea-Derivatives**

Veronica Iuliano, Paolo Della Sala, Carmen Talotta, Margherita De Rosa, Carmine Gaeta,  
Placido Neri, and Annunziata Soriente\*

Dipartimento di Chimica e Biologia "A. Zambelli", Università di Salerno, Via Giovanni Paolo  
II, I-84084 Fisciano (SALERNO), Italy

E-mail: [titti@unisa.it](mailto:titti@unisa.it)

## Table of Contents

|                                  |     |
|----------------------------------|-----|
| NMR Spectra .....                | S3  |
| HPLC Chromatograms.....          | S21 |
| Computational Details.....       | S27 |
| Atomic Coordinates.....          | S28 |
| 2-cis-A.....                     | S28 |
| 2-trans-A.....                   | S28 |
| 2-cis-B.....                     | S29 |
| 2-trans-B.....                   | S29 |
| 3-cis-A.....                     | S30 |
| 3-trans-A.....                   | S31 |
| 3-cis-B.....                     | S31 |
| 3-trans-B.....                   | S32 |
| 7-cis-cis.....                   | S33 |
| 7-trans-cis.....                 | S34 |
| 7-trans-trans.....               | S34 |
| 8-cis-cis.....                   | S35 |
| 8-trans-cis.....                 | S36 |
| 8-trans-trans.....               | S37 |
| 5@2-cis-A.....                   | S38 |
| 5@2-trans-A.....                 | S39 |
| 5@3-cis-A.....                   | S39 |
| 5@3-trans-A.....                 | S40 |
| 5@8-cis-cis.....                 | S41 |
| (5) <sub>2</sub> @8-cis-cis..... | S42 |
| Derivative 5.....                | S43 |
| NCI studies .....                | S44 |

## NMR Spectra

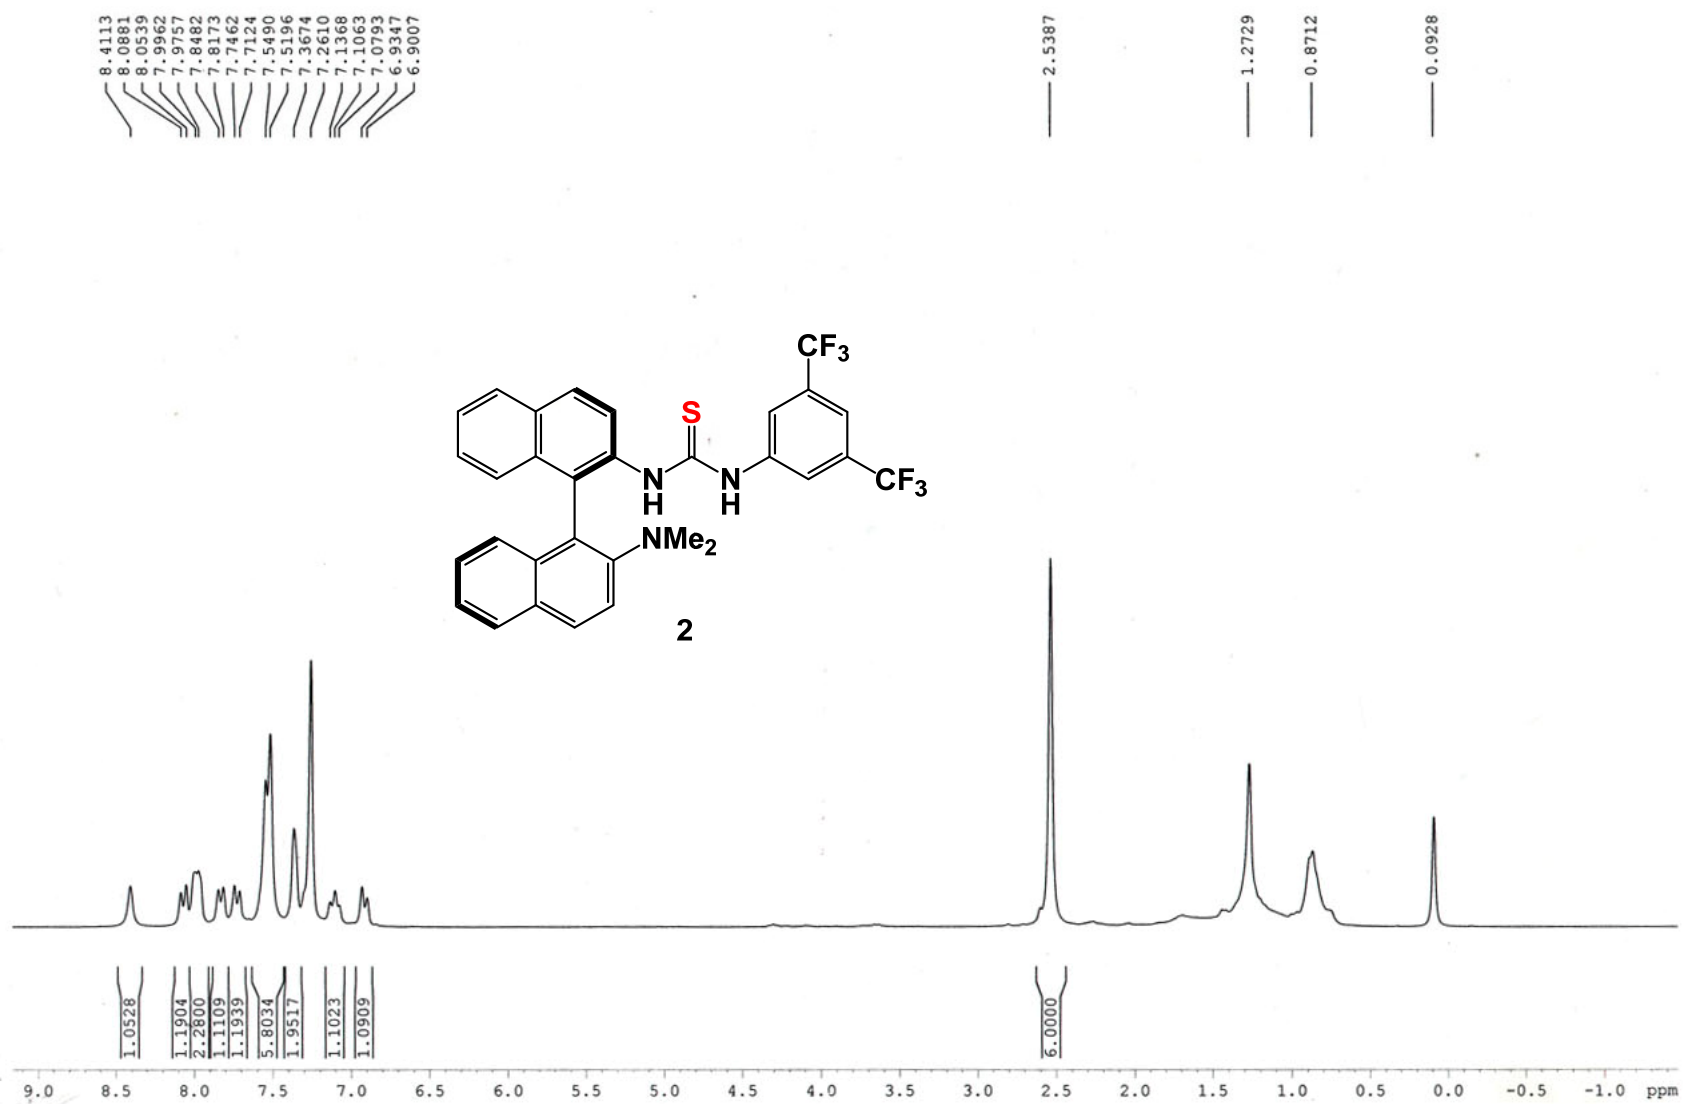

**Figure S1.** <sup>1</sup>H NMR spectrum of organocatalyst **2** (250 MHz, CDCl<sub>3</sub>, 298 K).

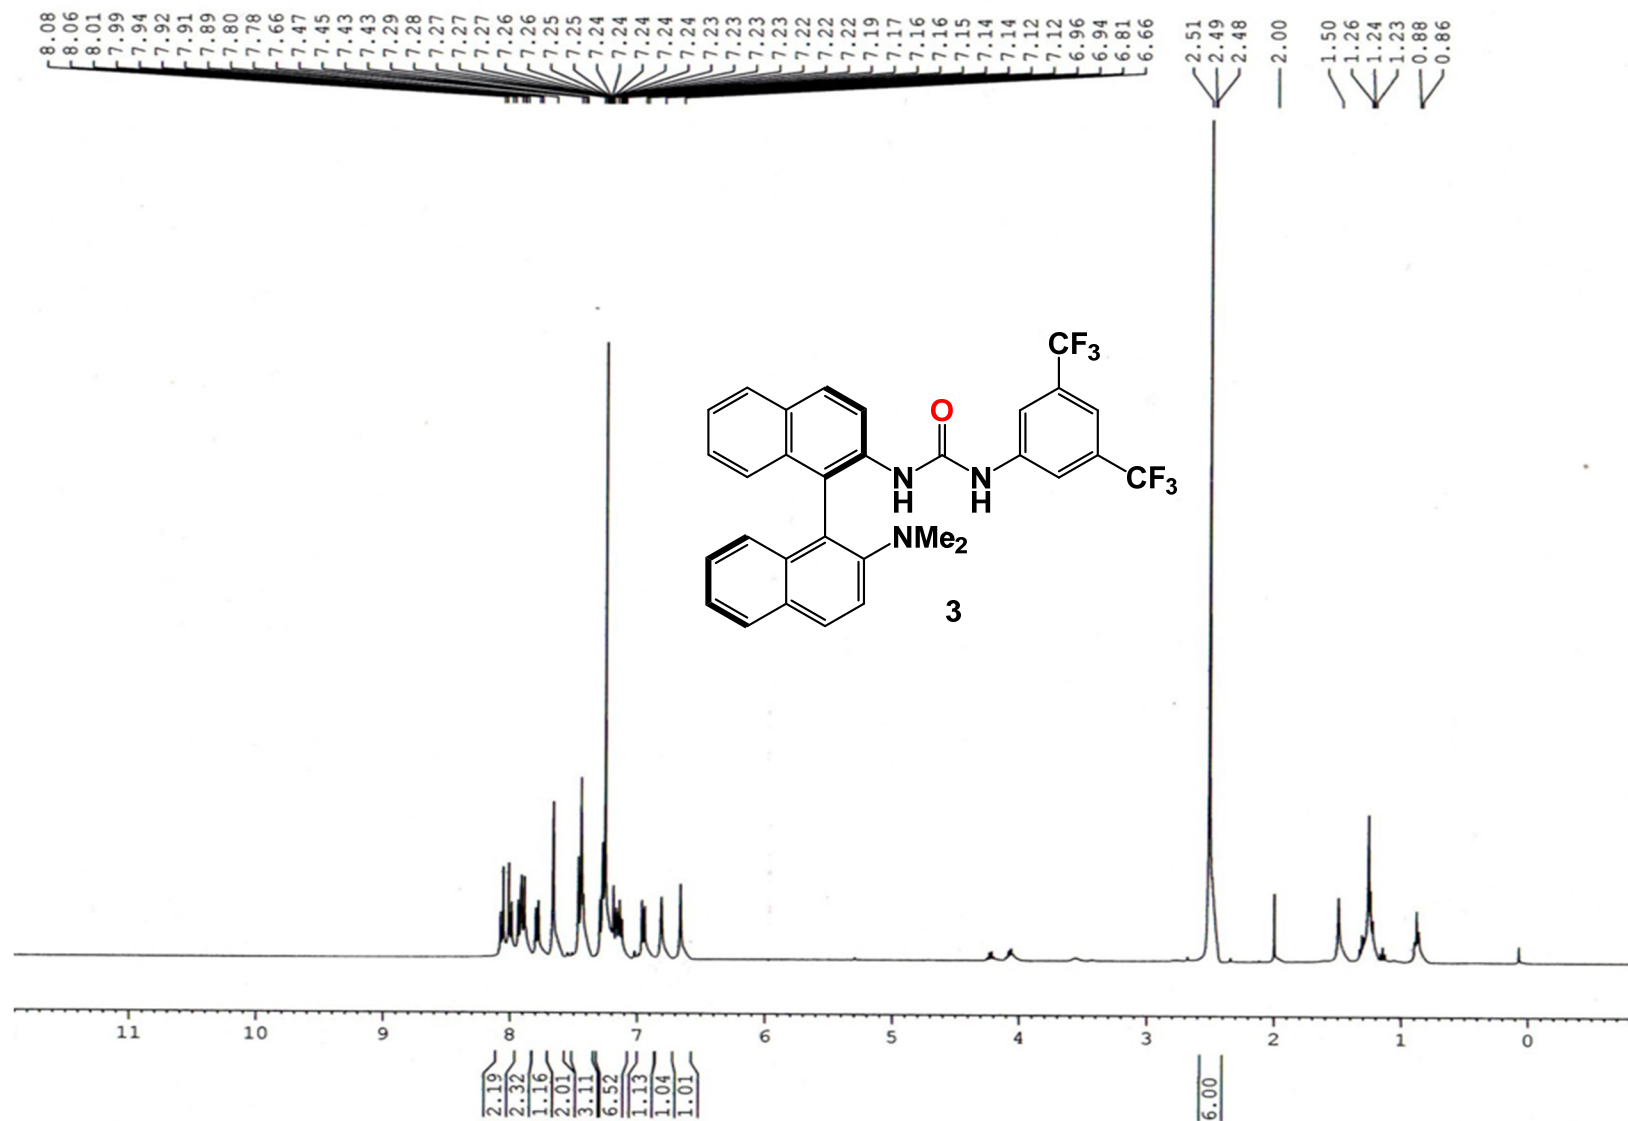

**Figure S2.** <sup>1</sup>H NMR spectrum of organocatalyst **3** (400 MHz, CDCl<sub>3</sub>, 298 K).

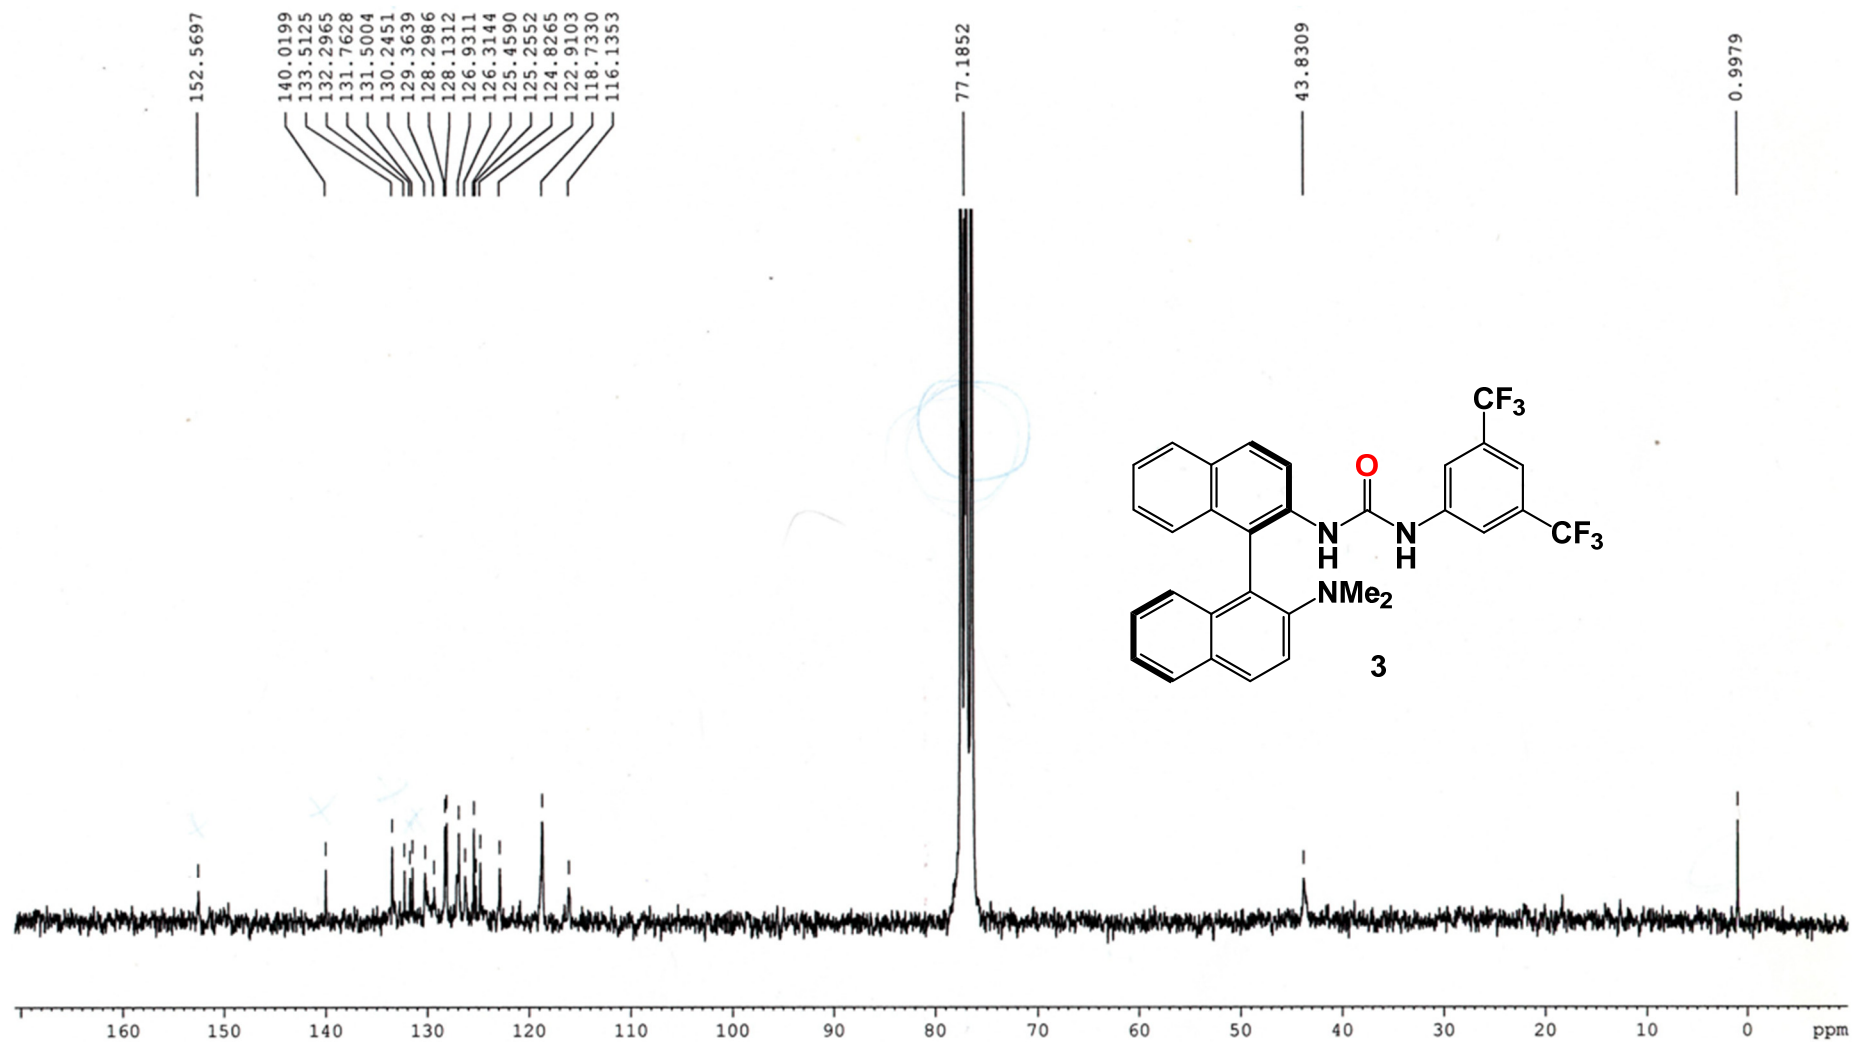

**Figure S3.**  $^{13}\text{C}$  NMR spectrum of organocatalyst **3** (100 MHz,  $\text{CDCl}_3$ , 298 K).

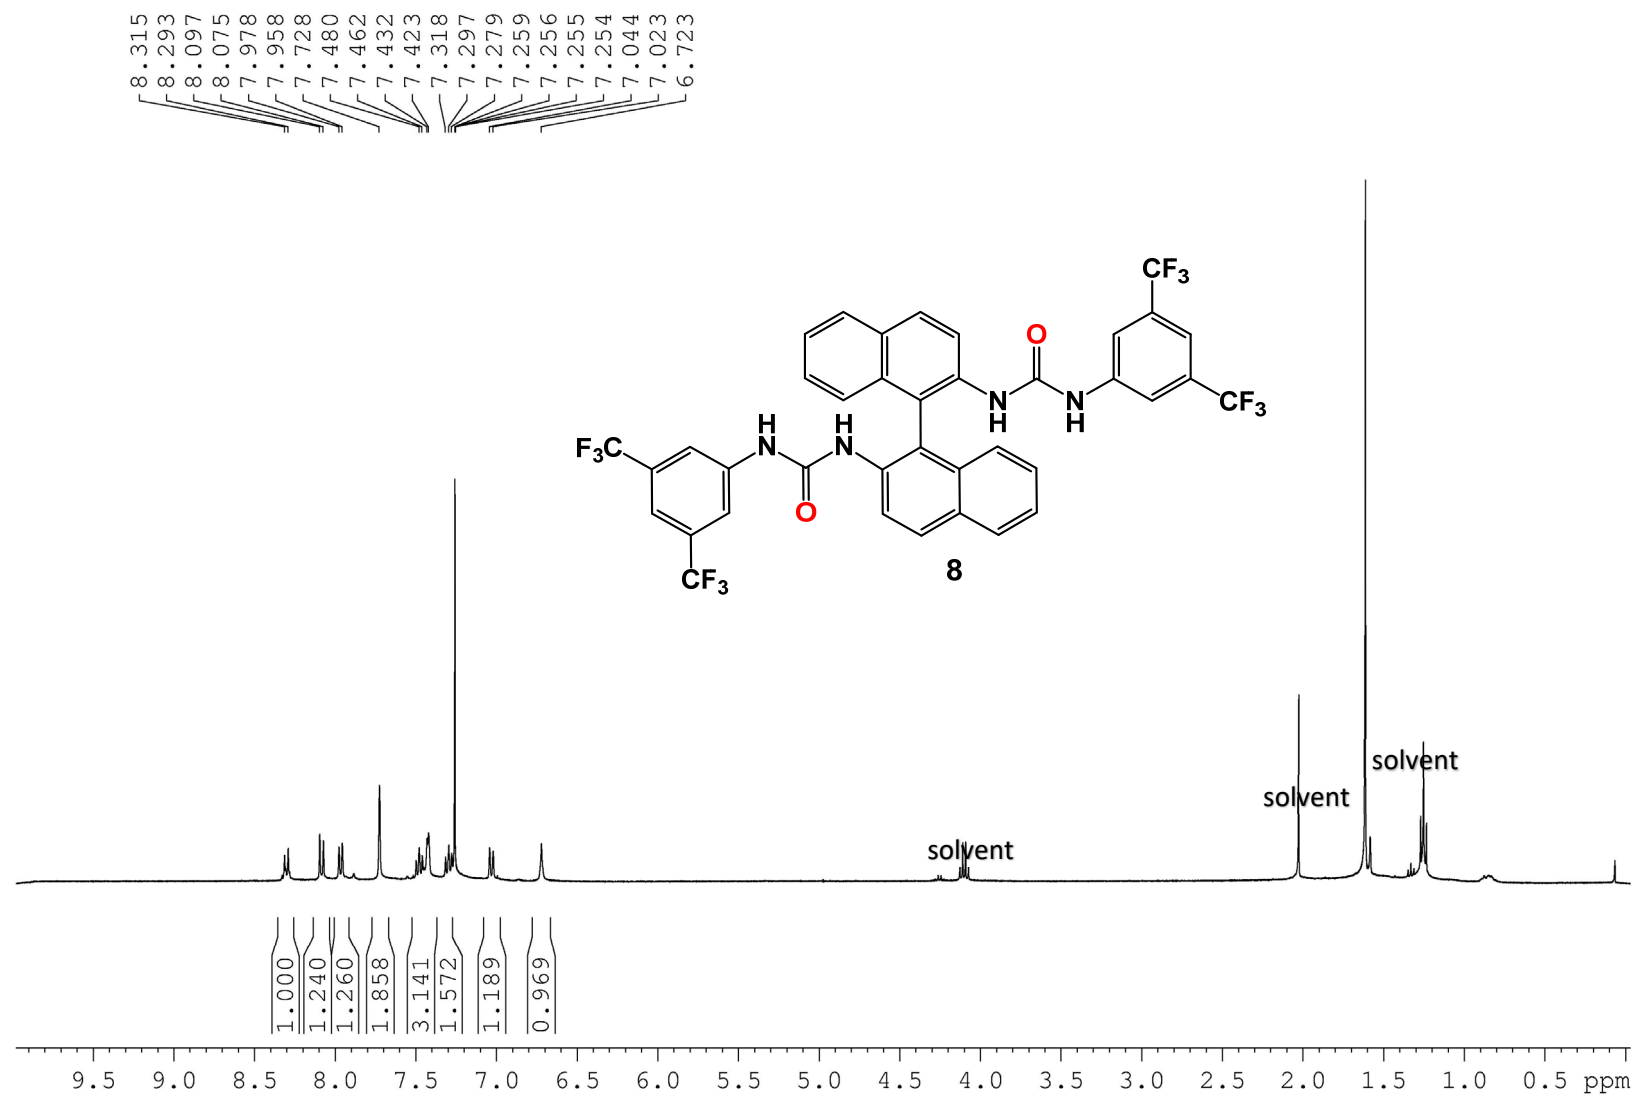

**Figure S4.**  $^1\text{H}$  NMR spectrum of organocatalyst **8** (400 MHz,  $\text{CDCl}_3$ , 298 K).

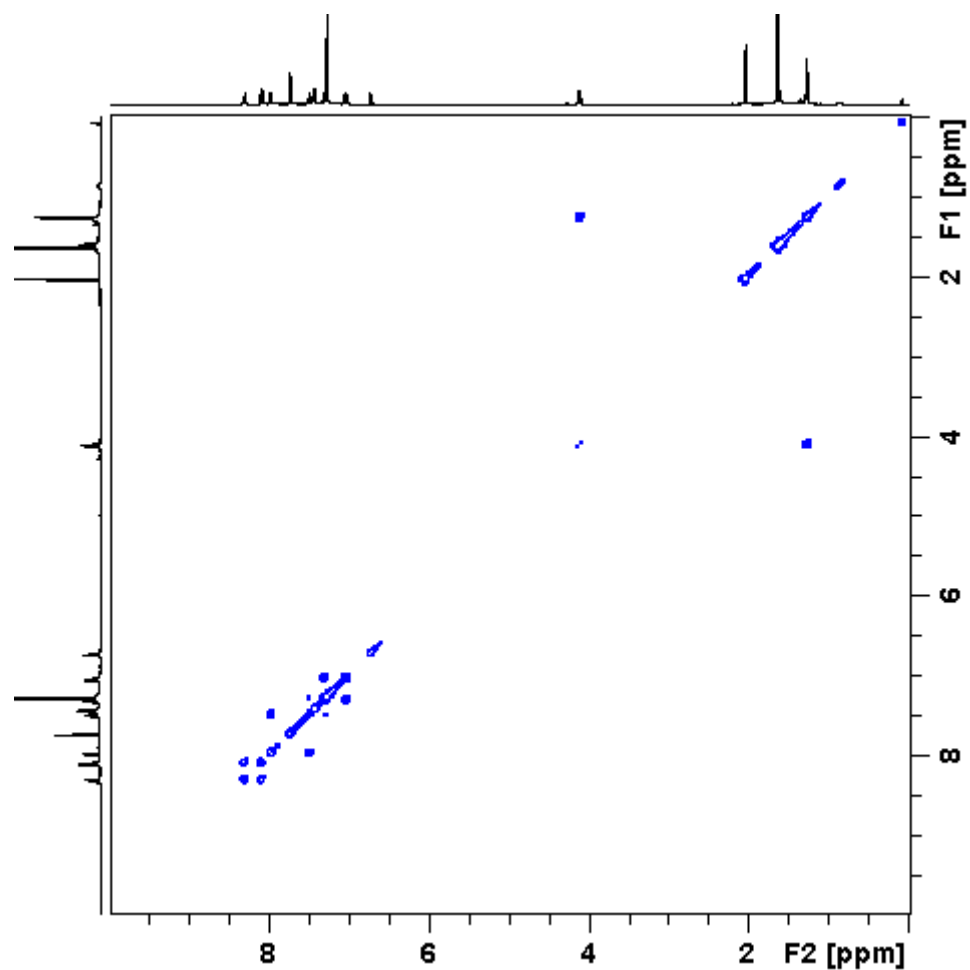

**Figure S5.** 2D COSY spectrum of organocatalyst **8** (400 MHz, CDCl<sub>3</sub>, 298 K).

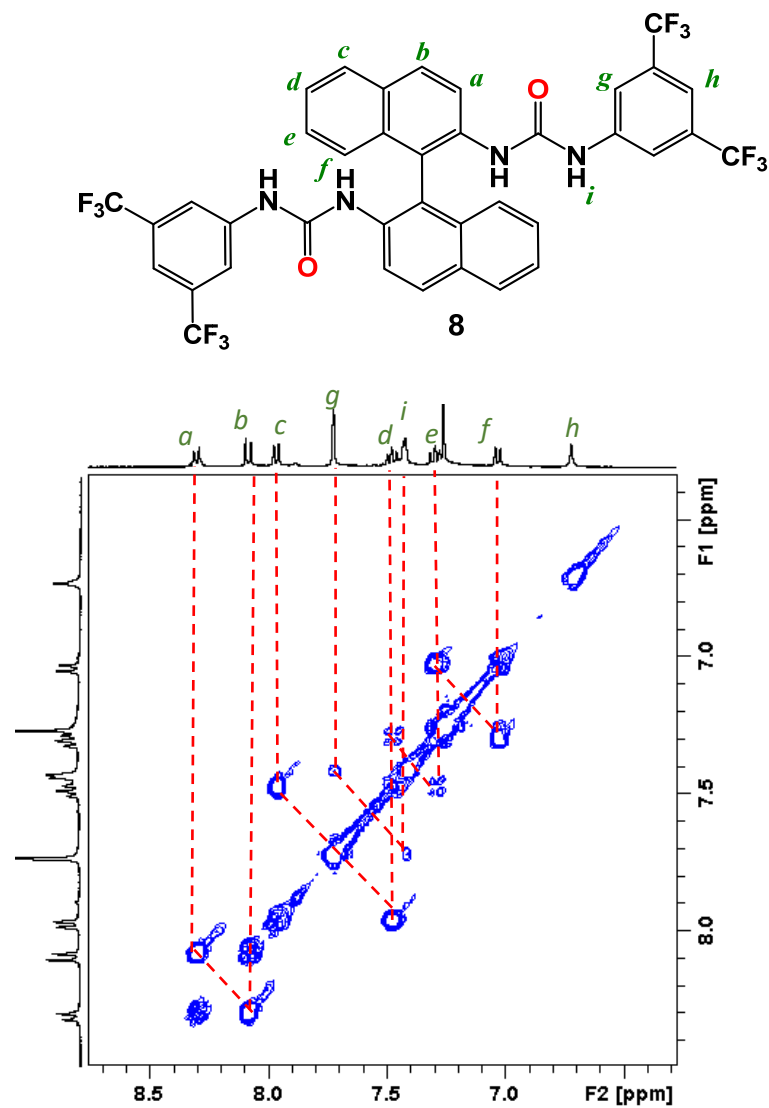

**Figure S6.** Portion of 2D COSY spectrum of organocatalyst **8** (400 MHz, CDCl<sub>3</sub>, 298 K).

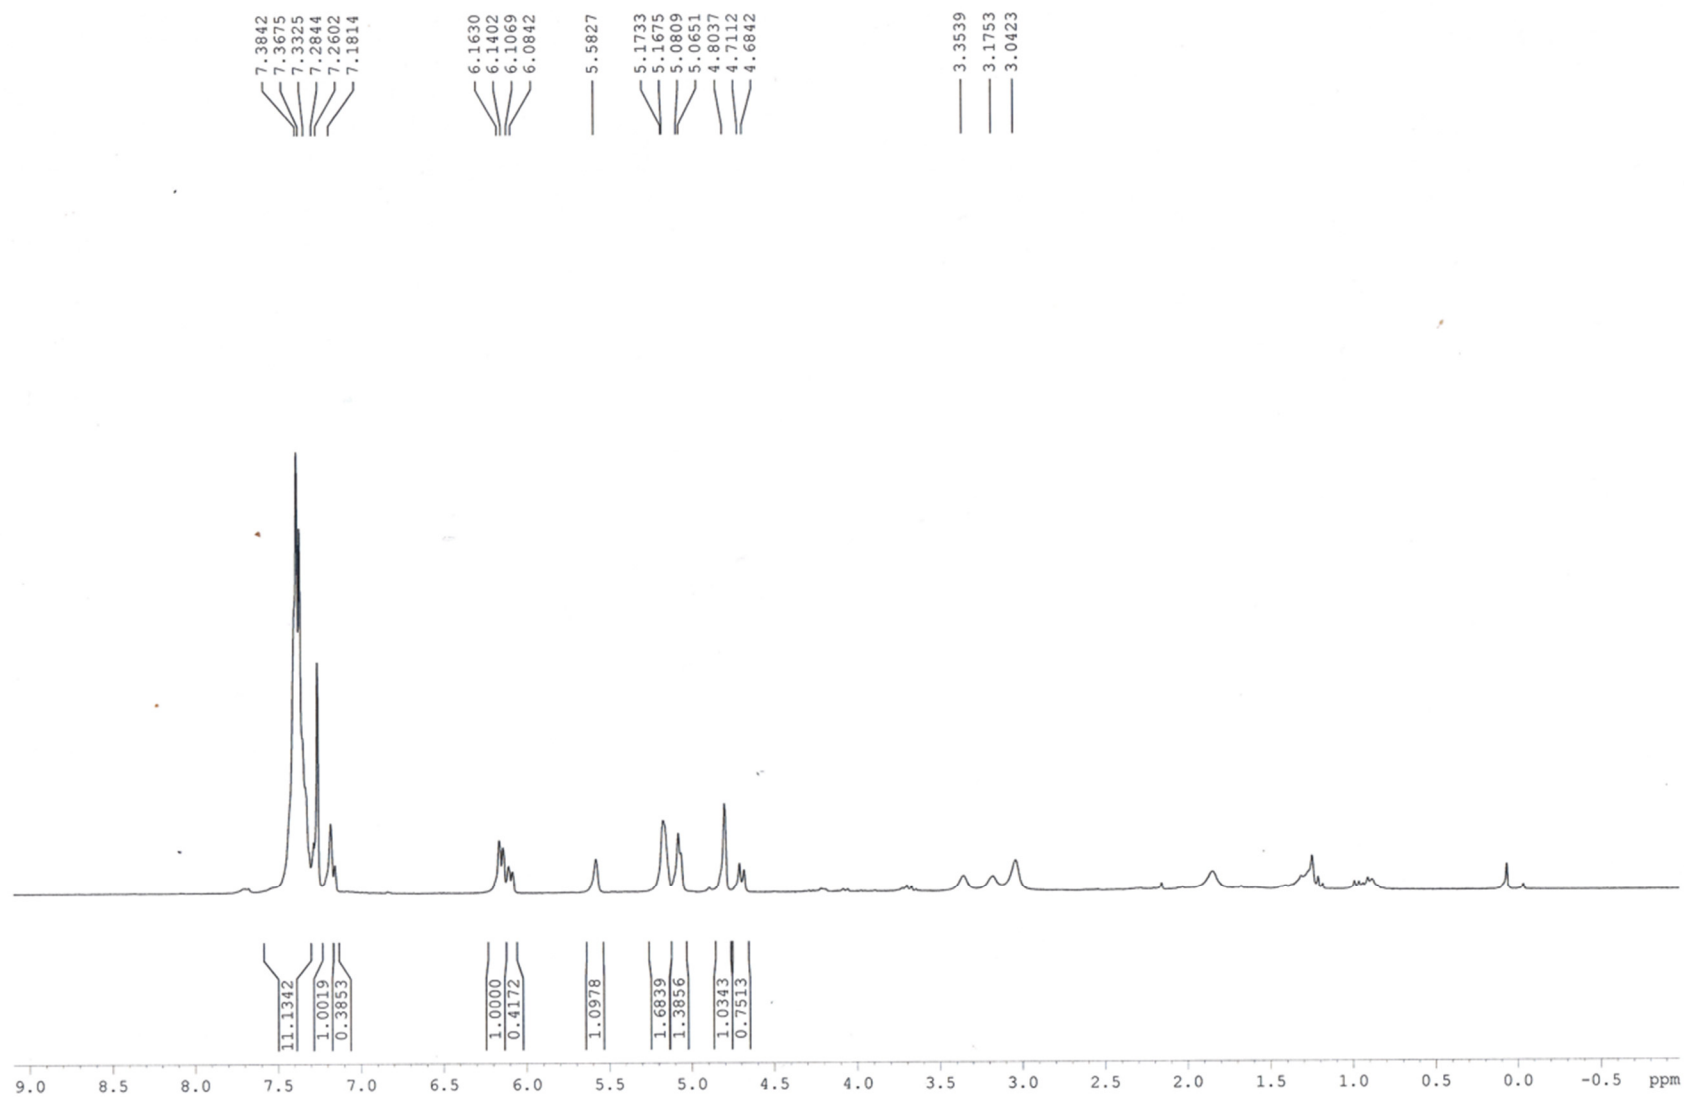

**Figure S7.**  $^1\text{H}$  NMR spectrum of *Erythro/Threo* mixture, entry 1 of Table 1 (250 MHz,  $\text{CDCl}_3$ , 298 K).



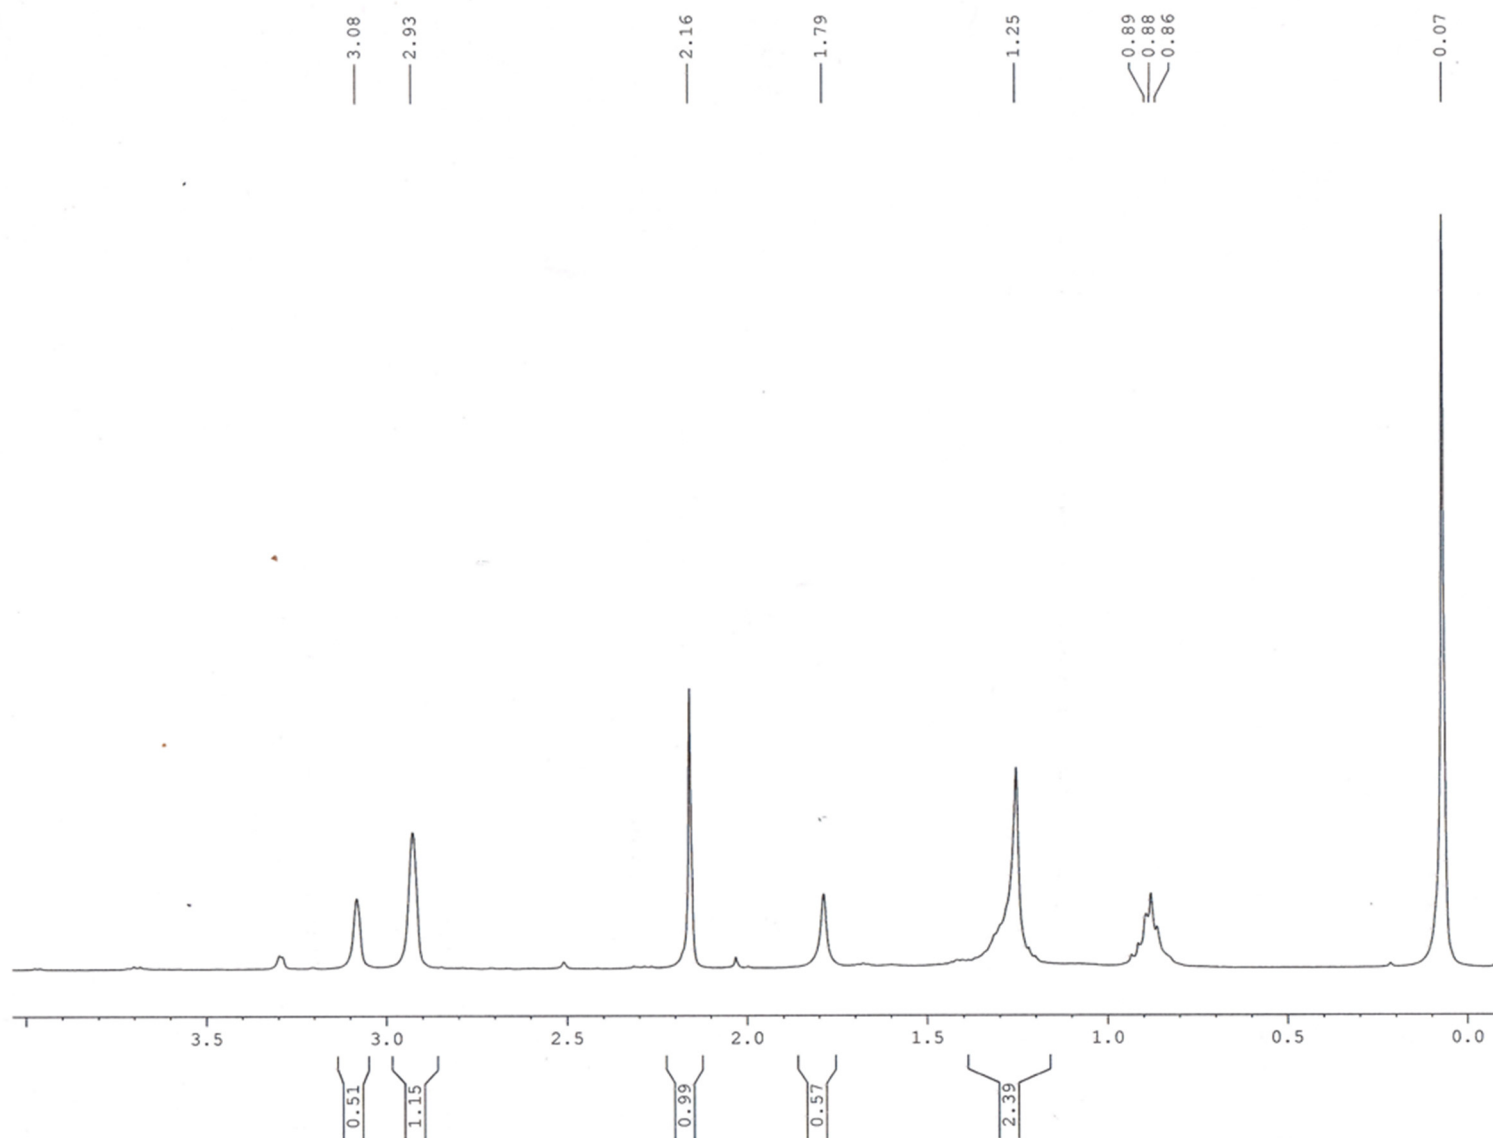

**Figure S8.**  $^1\text{H}$  NMR spectrum of *Erythro/Threo* mixture, entry 2 of Table 1 (250 MHz,  $\text{CDCl}_3$ , 298 K).

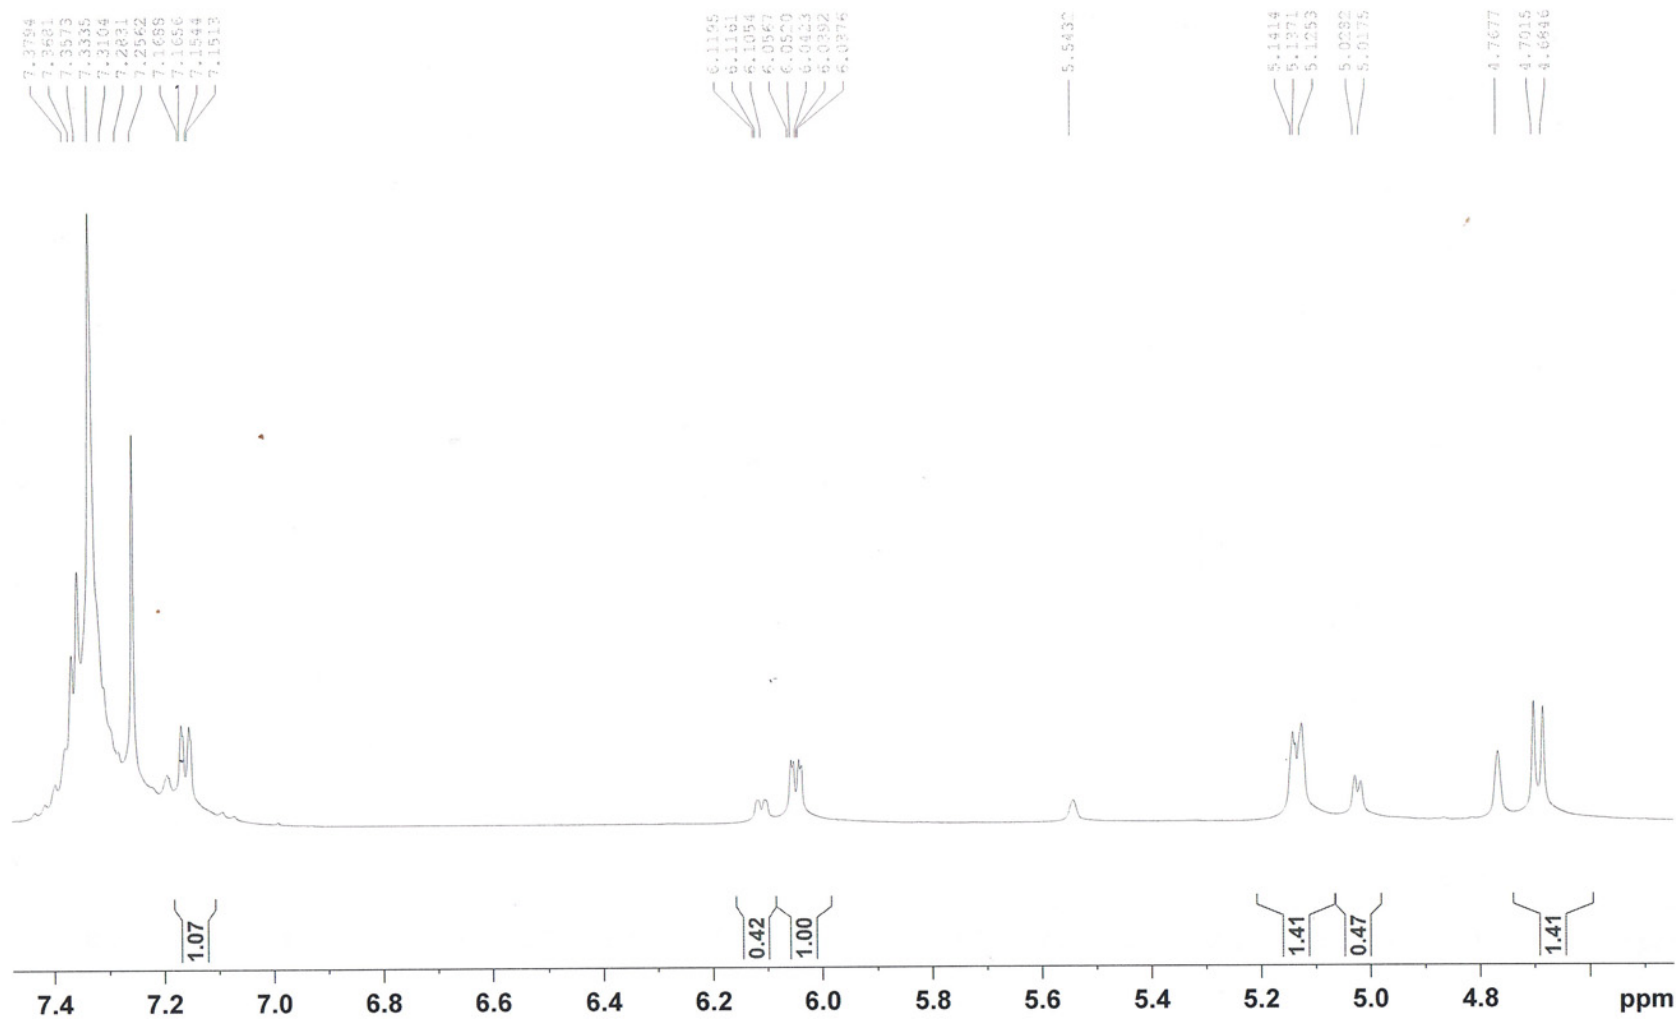

**Figure S9.**  $^1\text{H}$  NMR spectrum of *Erythro/Threo* mixture, entry 1 of Table 3 (400 MHz,  $\text{CDCl}_3$ , 298 K).

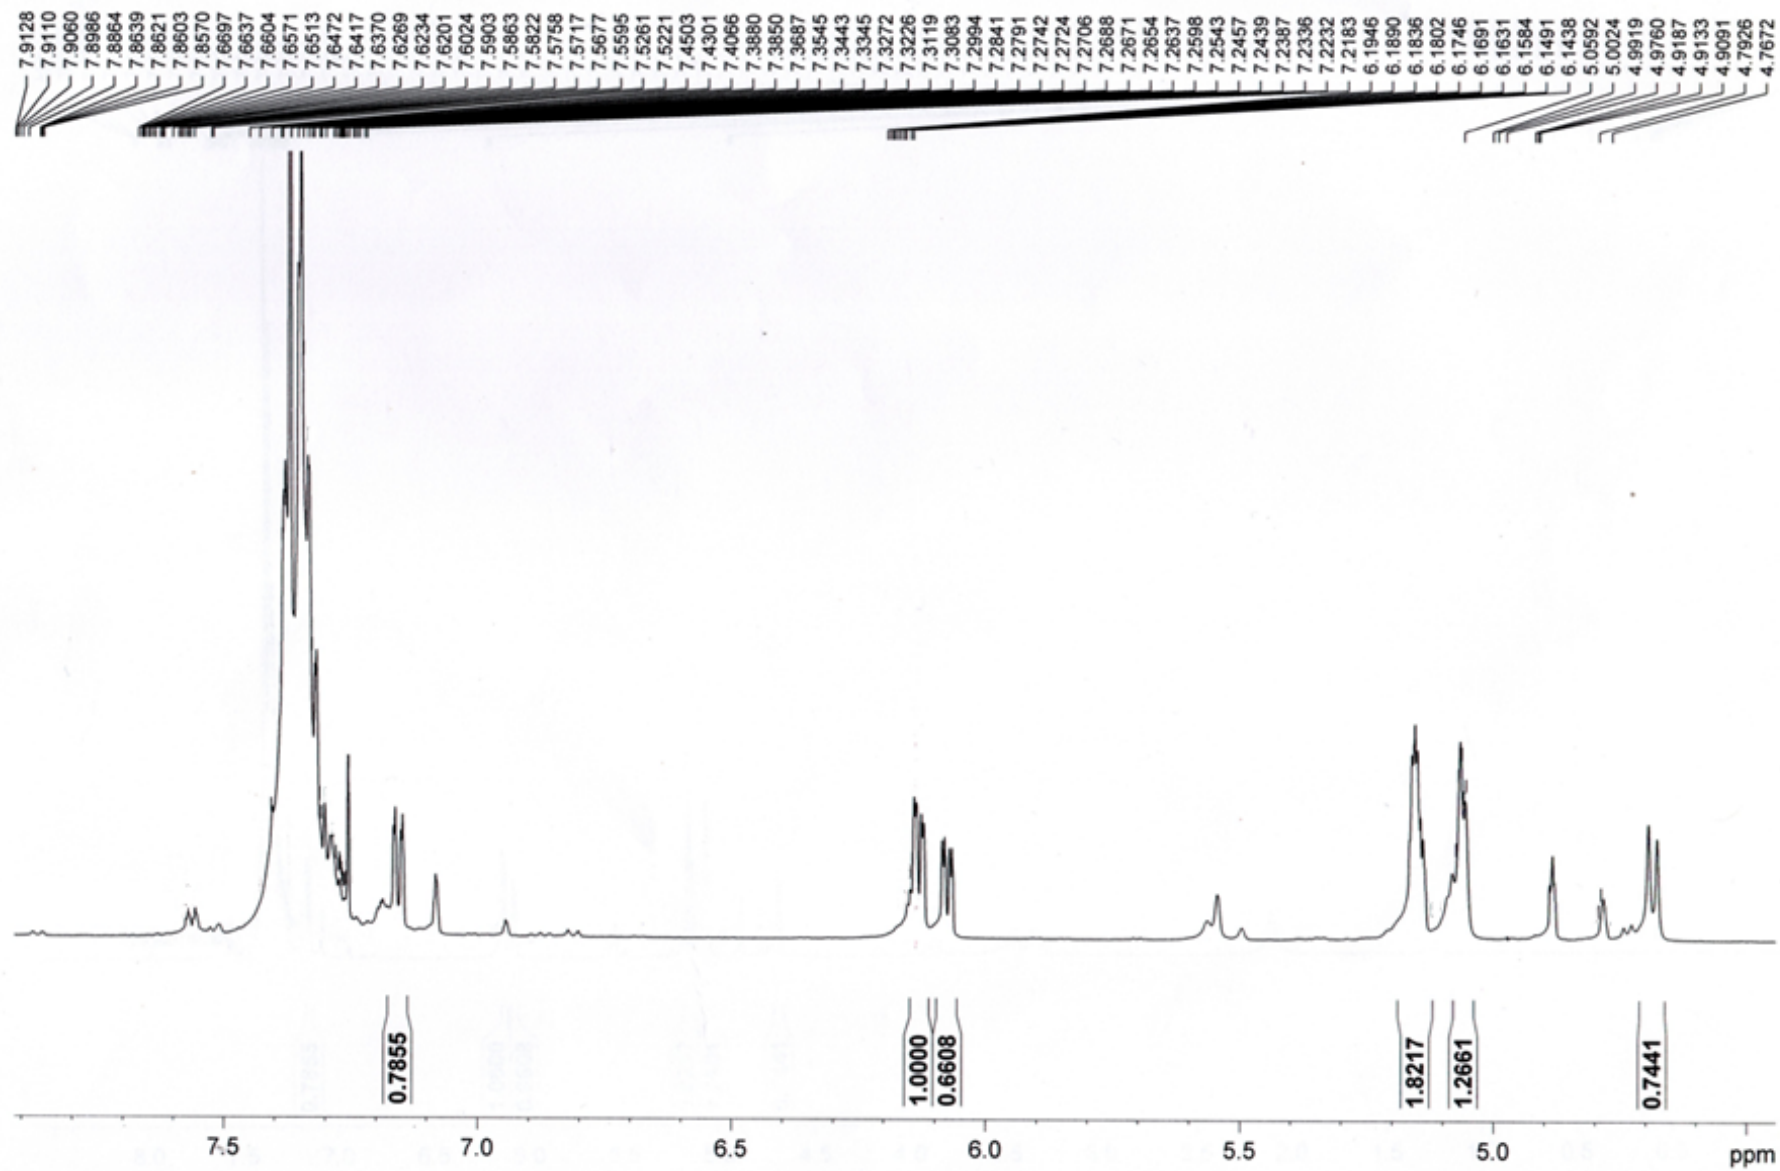

**Figure S10.**  $^1\text{H}$  NMR spectrum of *Erythro/Threo* mixture, entry 2 of Table 3 (400 MHz,  $\text{CDCl}_3$ , 298 K).

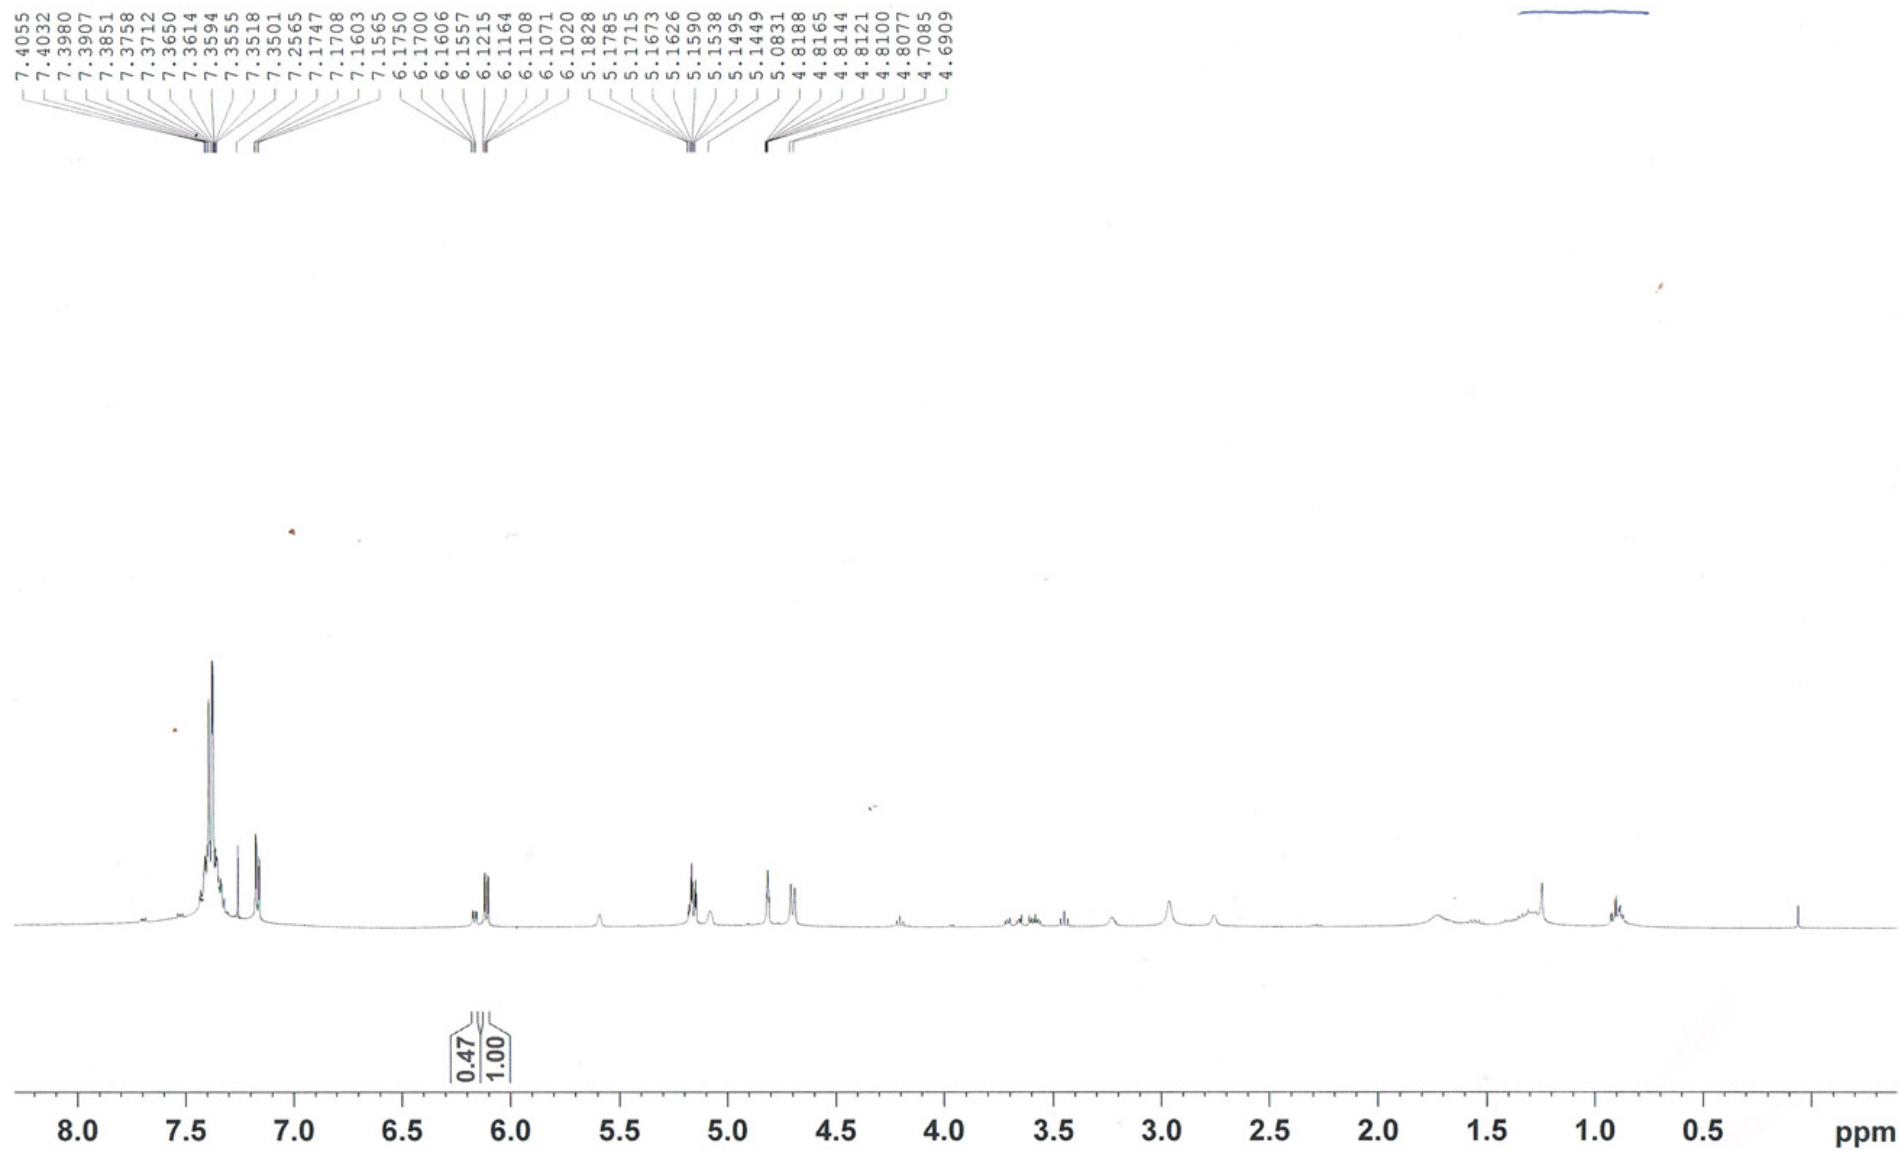

**Figure S11.**  $^1\text{H}$  NMR spectrum of *Erythro/Threo* mixture, entry 3 of Table 3 (400 MHz,  $\text{CDCl}_3$ , 298 K)

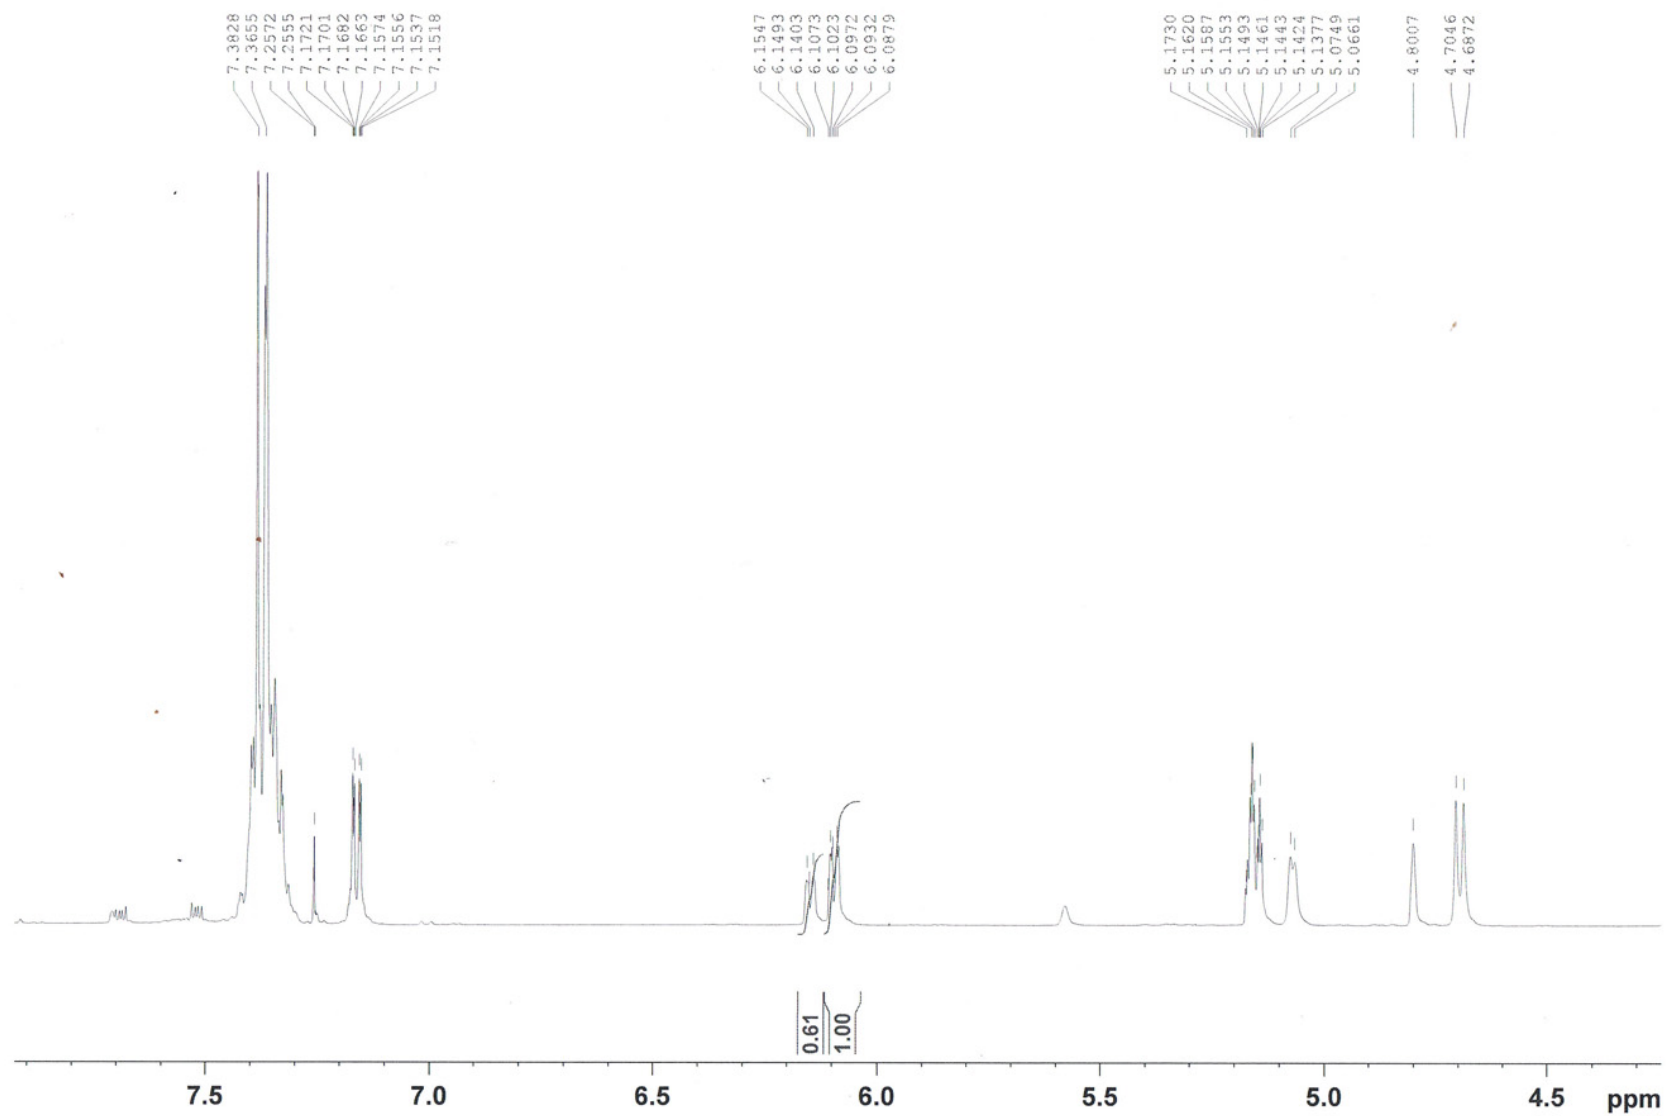

**Figure S12.** <sup>1</sup>H NMR spectrum of *Erythro/Threo* mixture, entry 4 of Table 3 (400 MHz, CDCl<sub>3</sub>, 298 K)

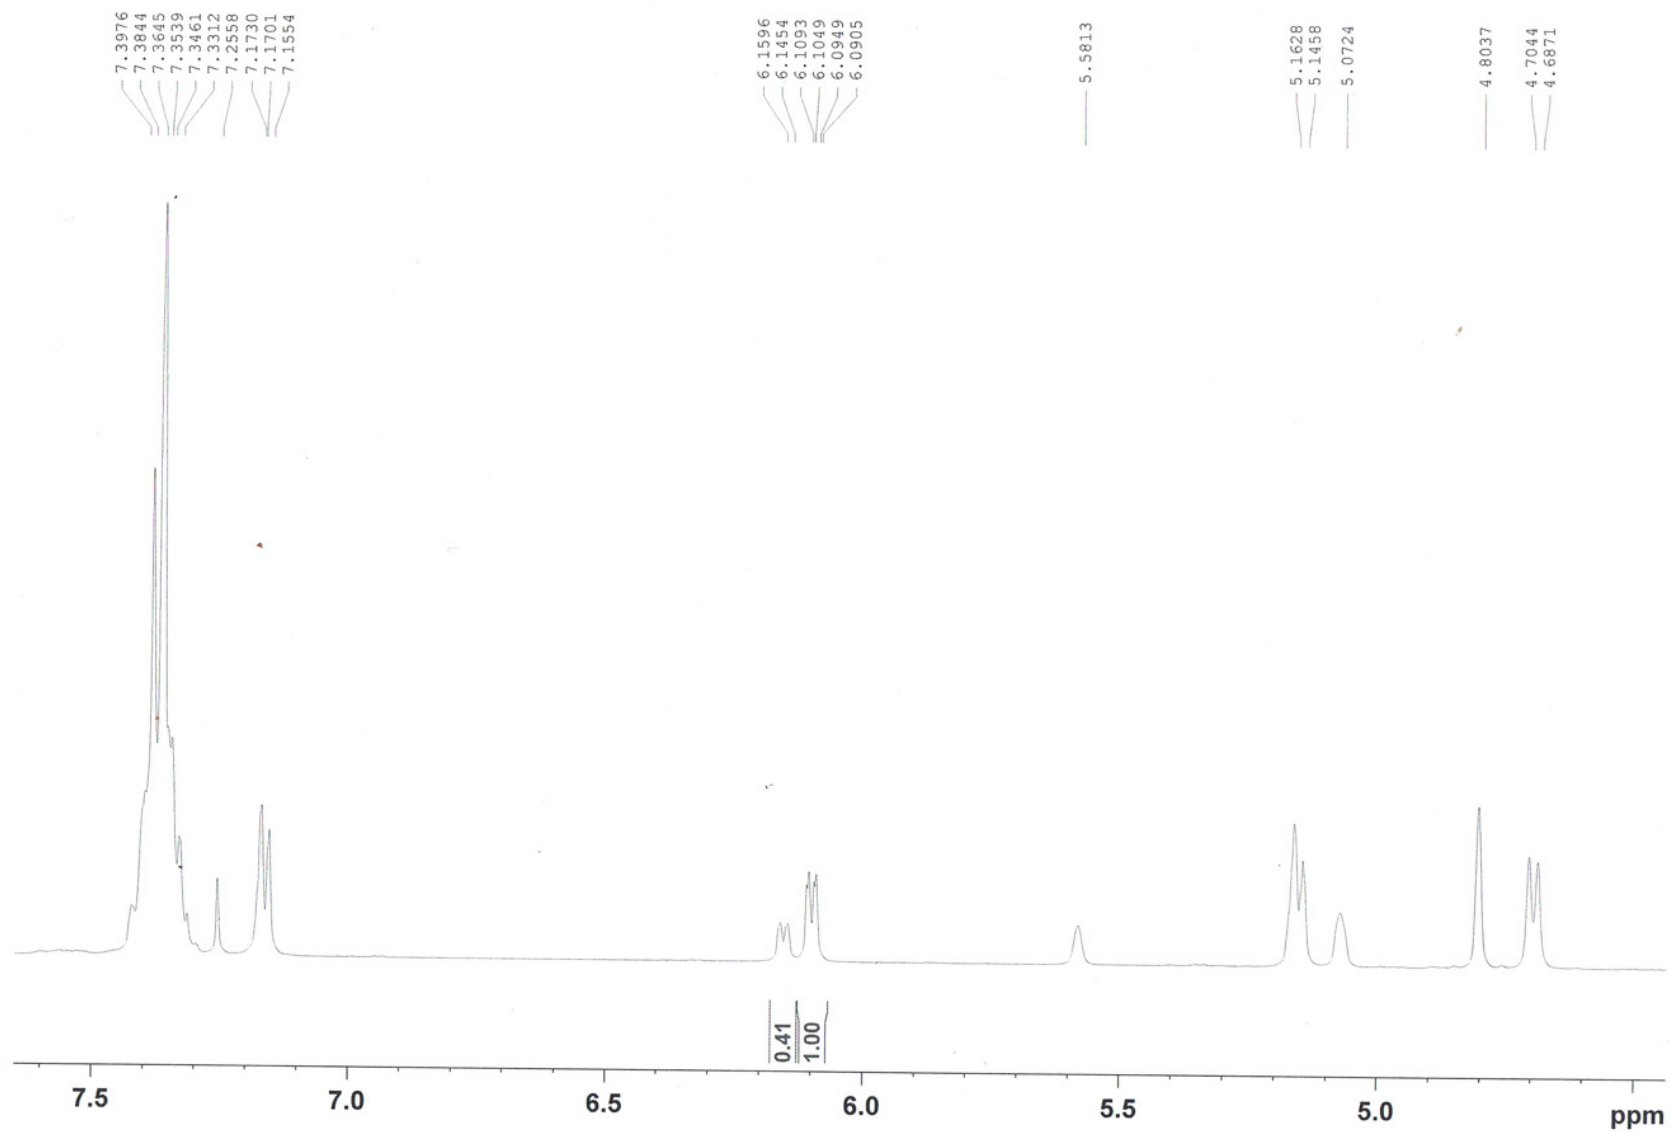

**Figure S13.**  $^1\text{H}$  NMR spectrum of *Erythro/Threo* mixture, entry 5 of Table 3 (400 MHz,  $\text{CDCl}_3$ , 298 K)

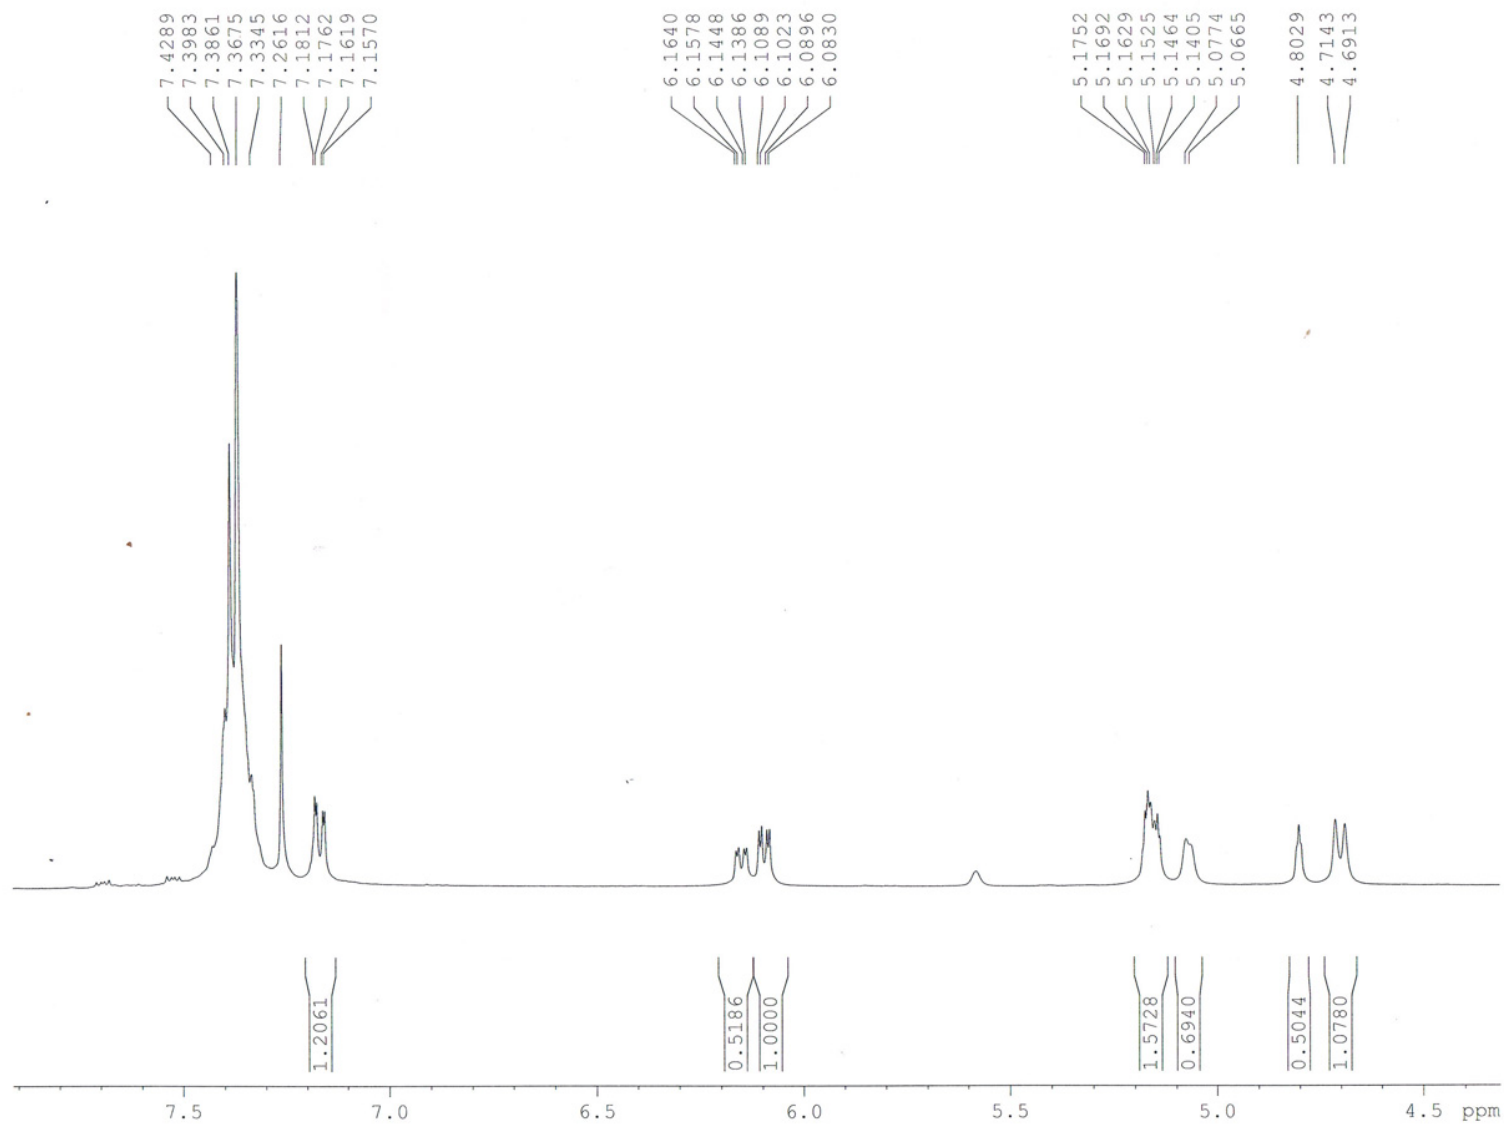

**Figure S14.**  $^1\text{H}$  NMR spectrum of *Erythro/Threo* mixture, entry 6 of Table 3 (400 MHz,  $\text{CDCl}_3$ , 298 K)

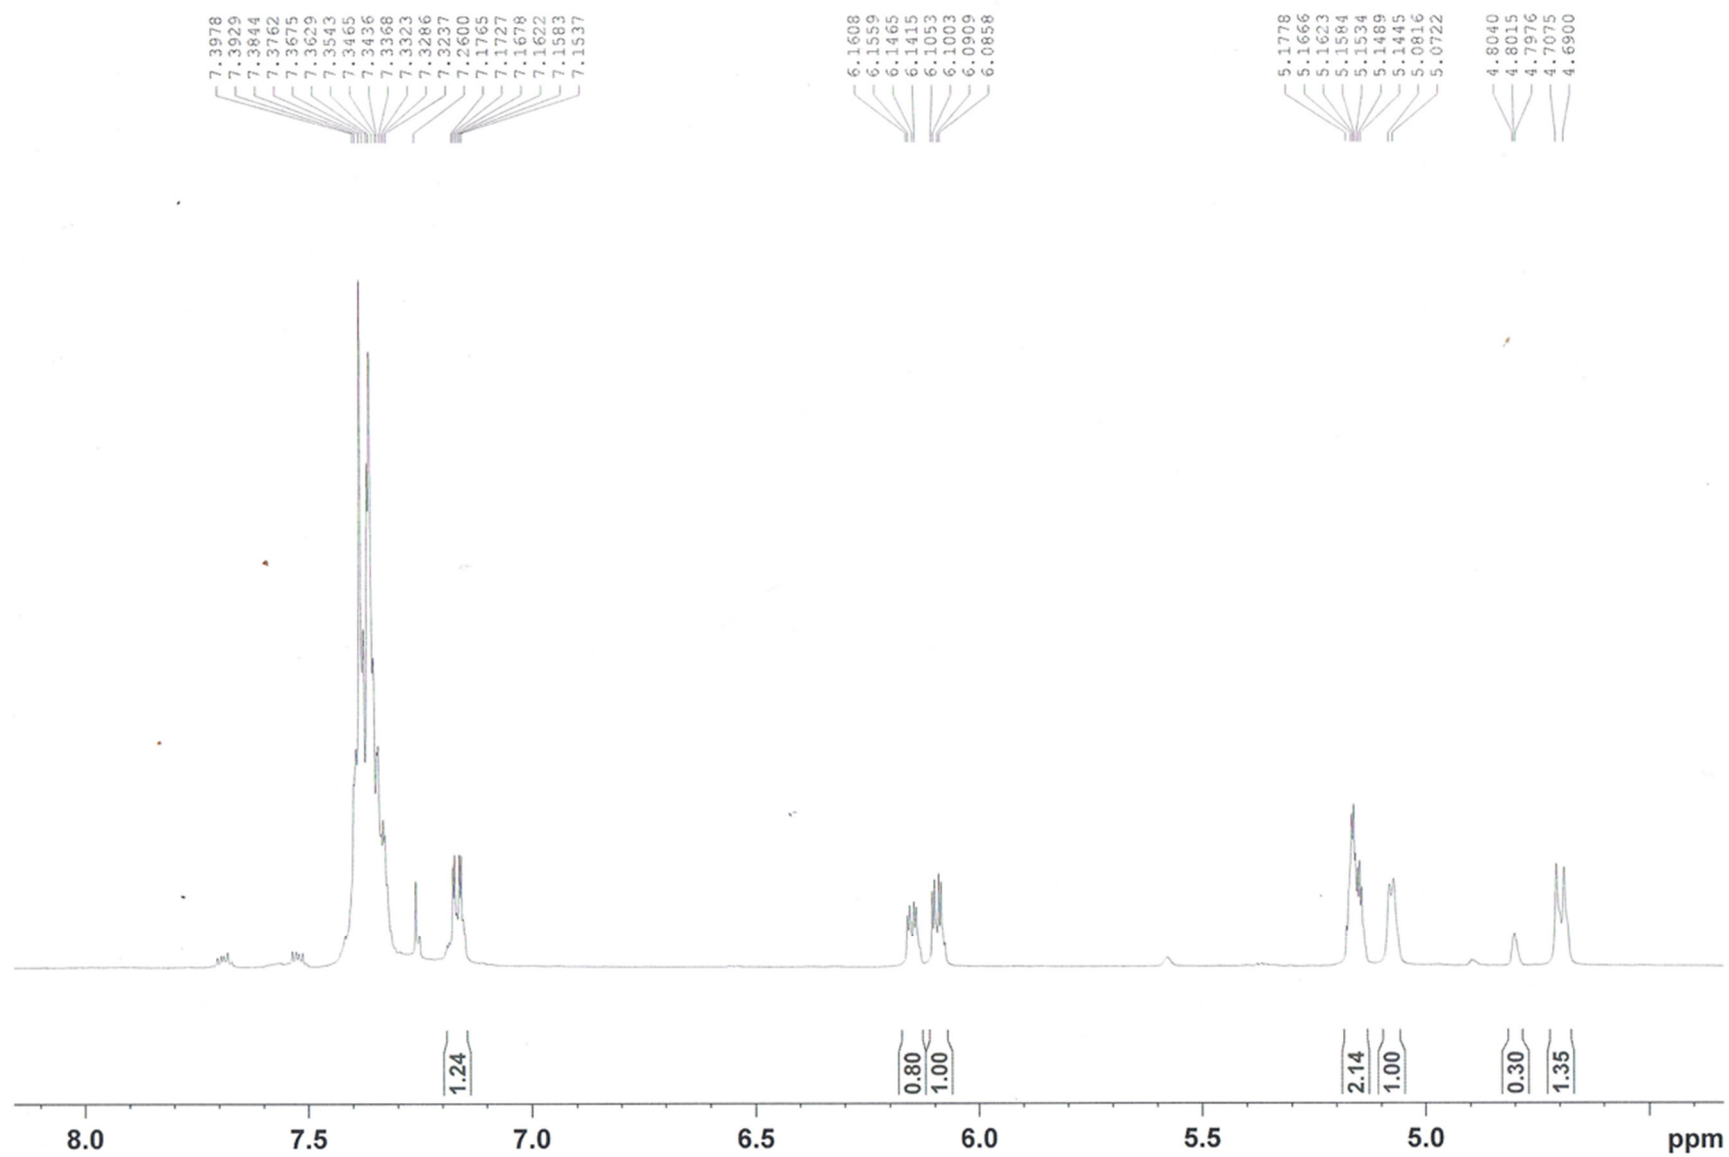

**Figure S15.**  $^1\text{H}$  NMR spectrum of *Erythro/Threo* mixture, entry 2 of Table 4 (400 MHz,  $\text{CDCl}_3$ , 298 K)



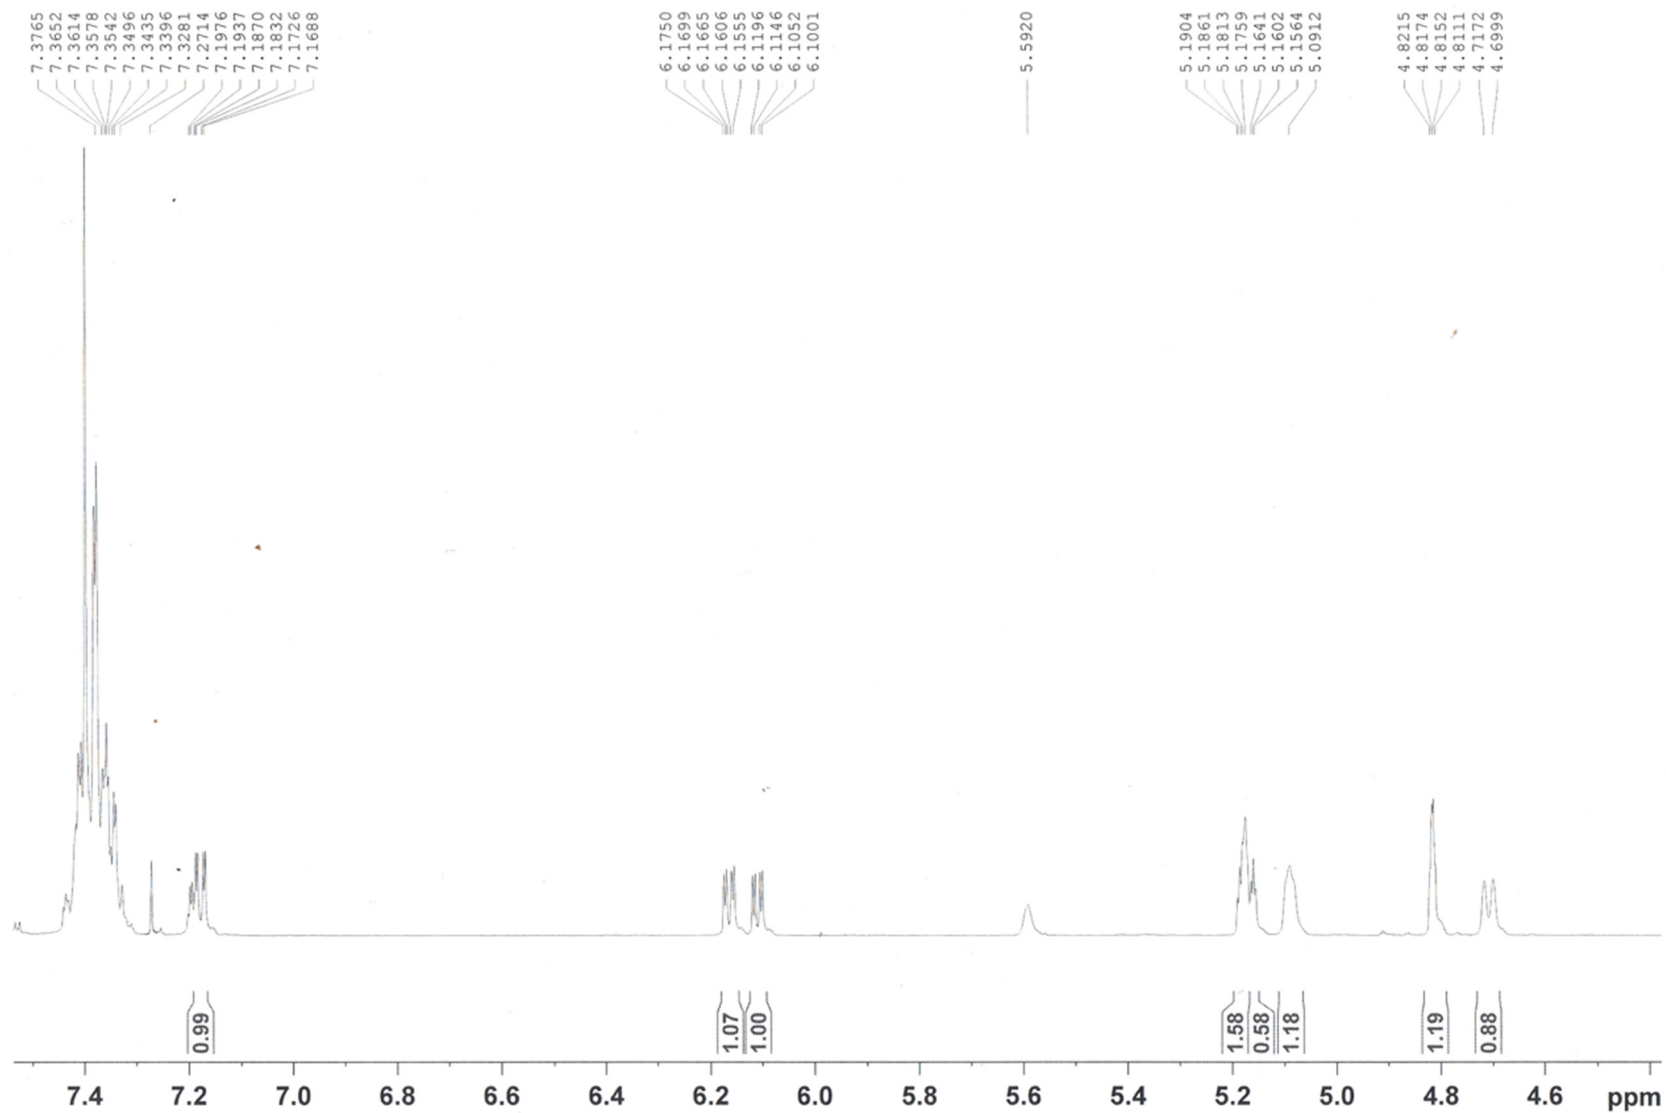

**Figure S16.**  $^1\text{H}$  NMR spectrum of *Erythro/Threo* mixture, entry 3 of Table 4 (400 MHz,  $\text{CDCl}_3$ , 298 K)

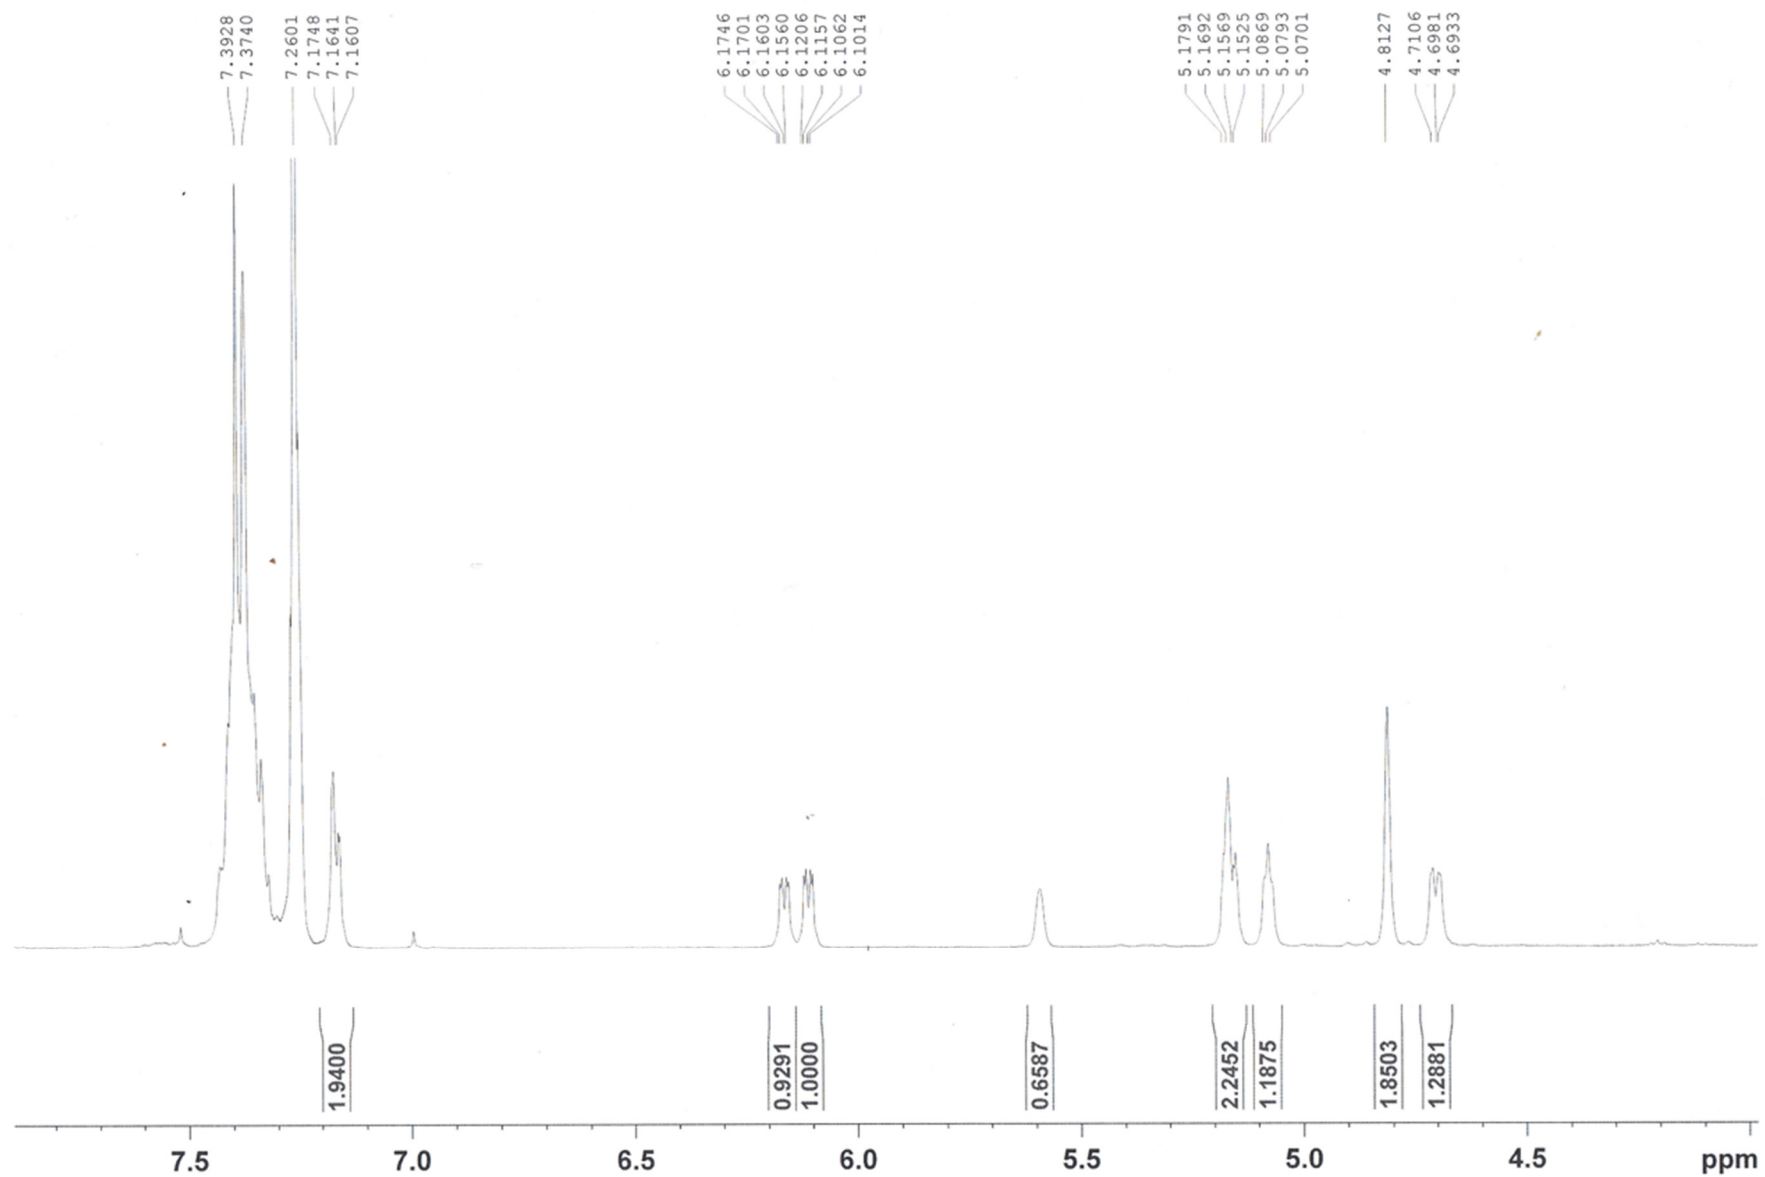

**Figure S17.** <sup>1</sup>H NMR spectrum of *Erythro/Threo* mixture, entry 4 of Table 4 (400 MHz, CDCl<sub>3</sub>, 298 K)

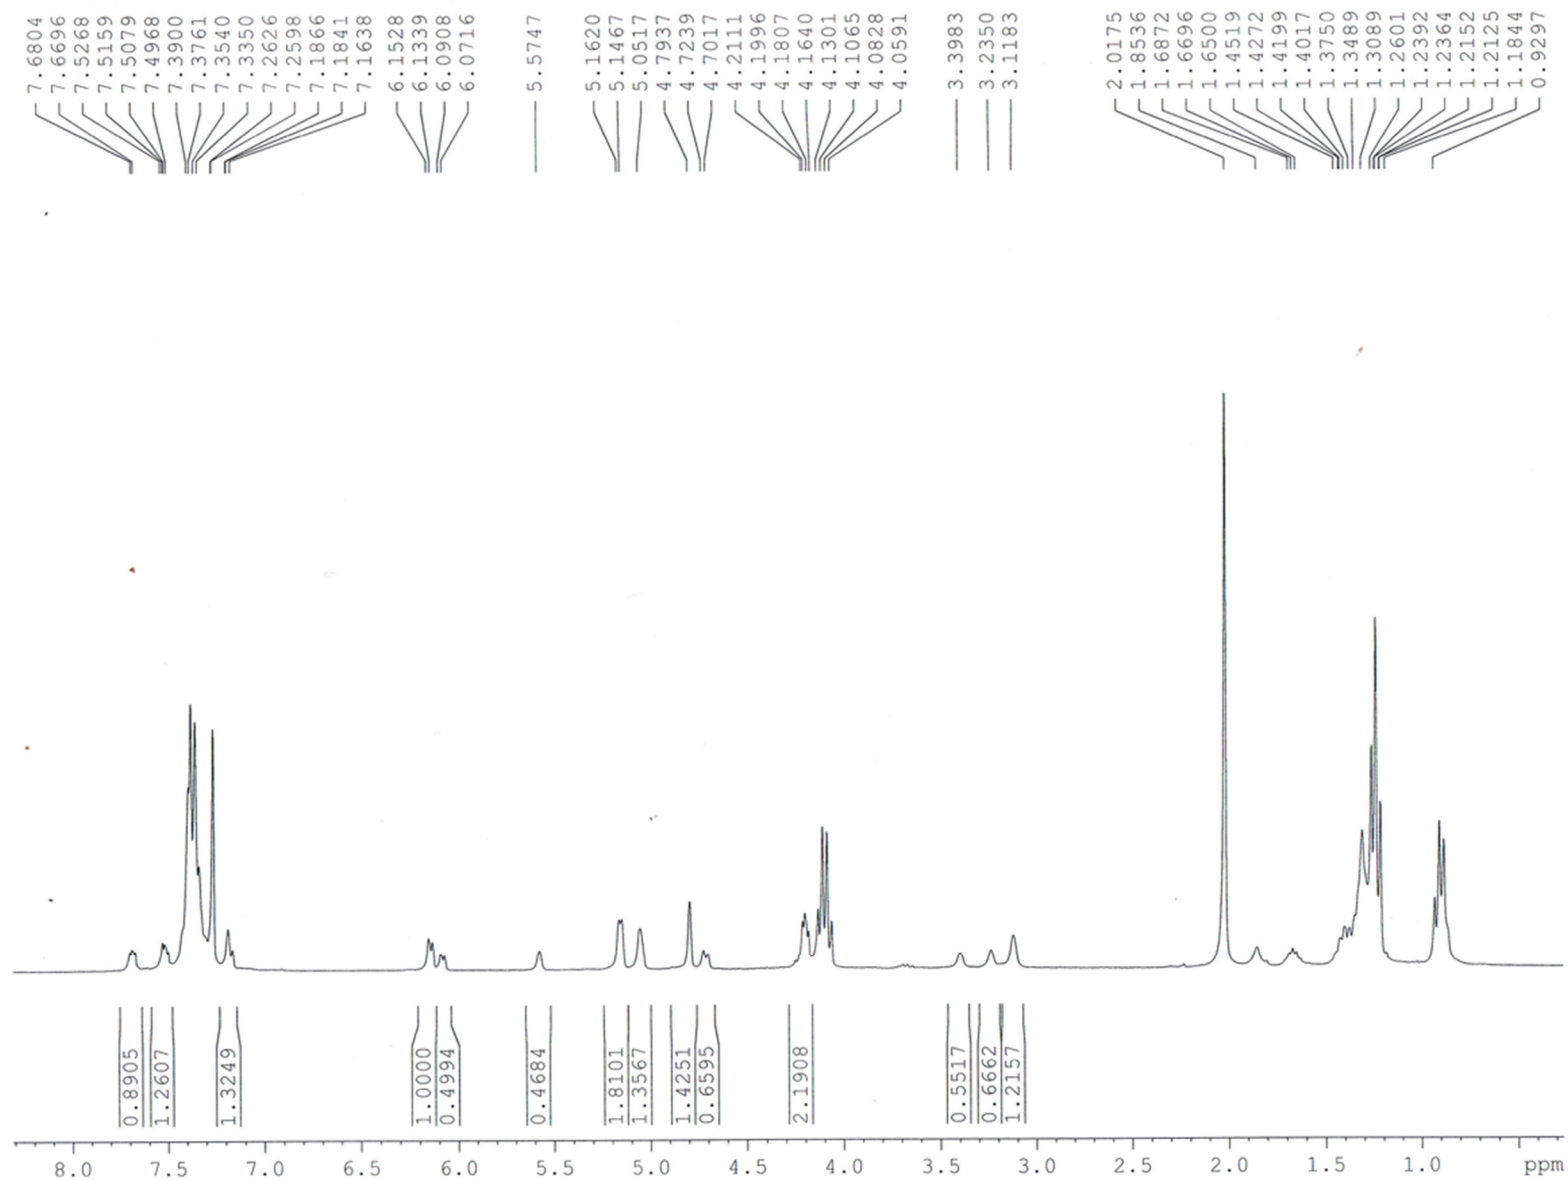

**Figure S18.**  $^1\text{H}$  NMR spectrum of *Erythro/Threo* mixture, entry 5 of Table 4 (400 MHz,  $\text{CDCl}_3$ , 298 K)

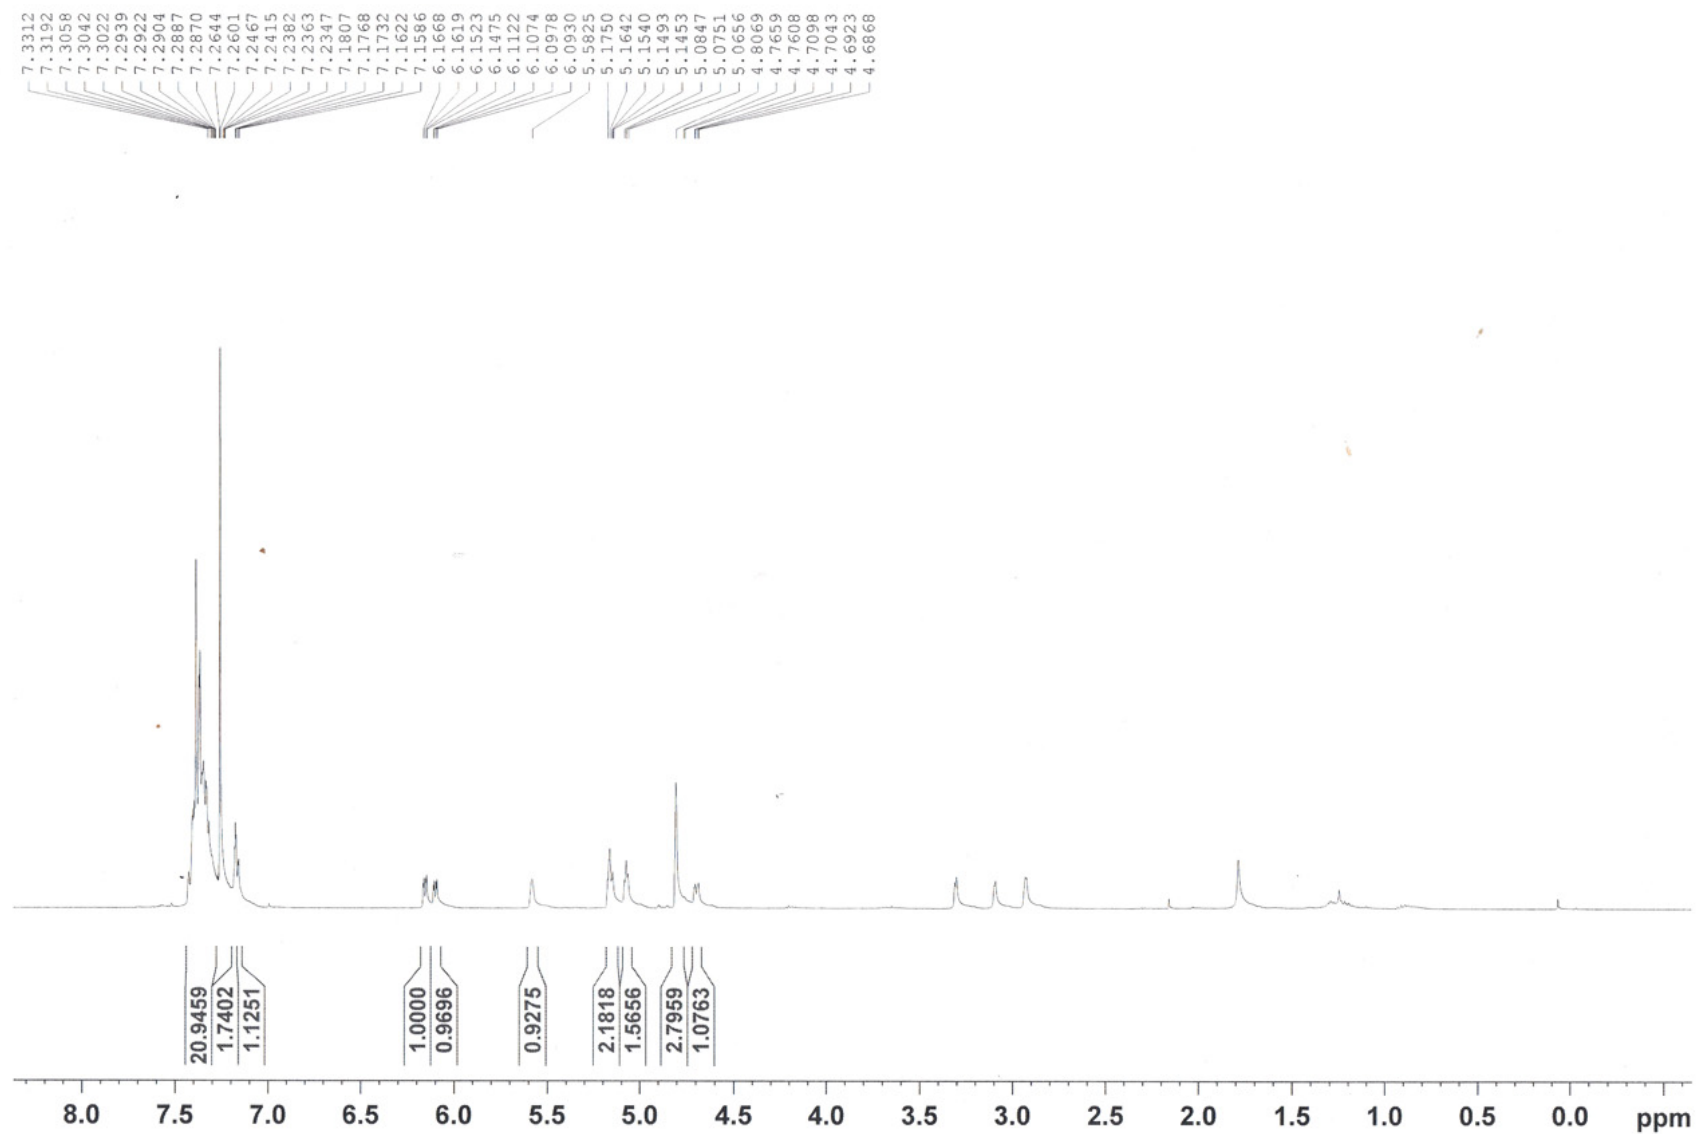

**Figure S19.**  $^1\text{H}$  NMR spectrum of *Erythro/Threo* mixture, entry 6 of Table 4 (400 MHz,  $\text{CDCl}_3$ , 298 K)

## HPLC Chromatograms

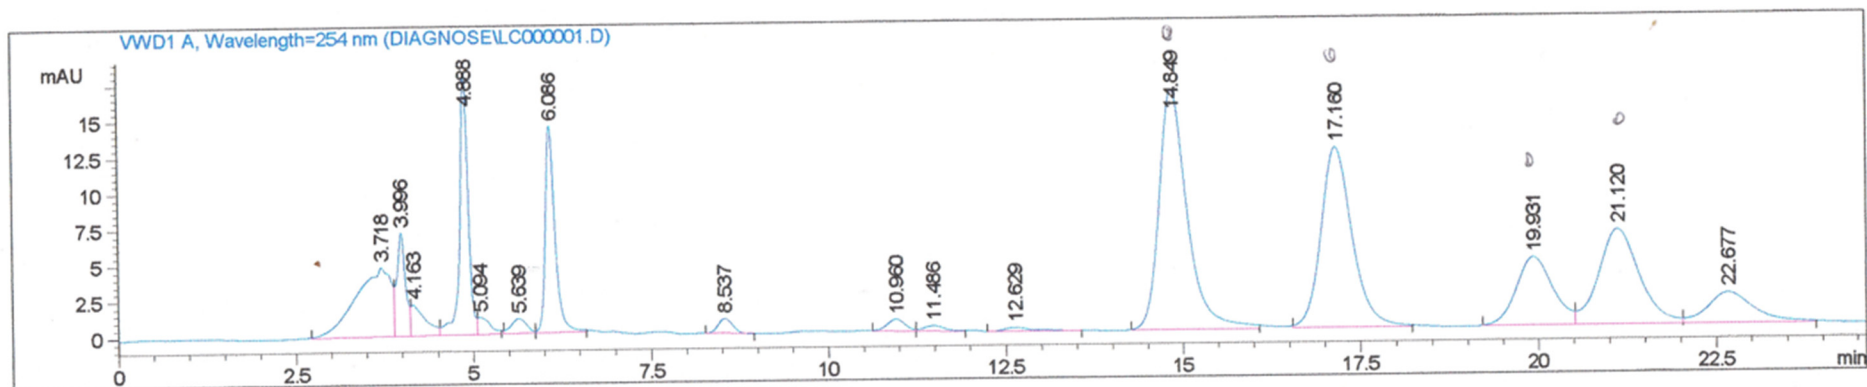

Figure S20. HPLC Chromatogram of *Erythro/Threo* mixture entry 1, table 1.

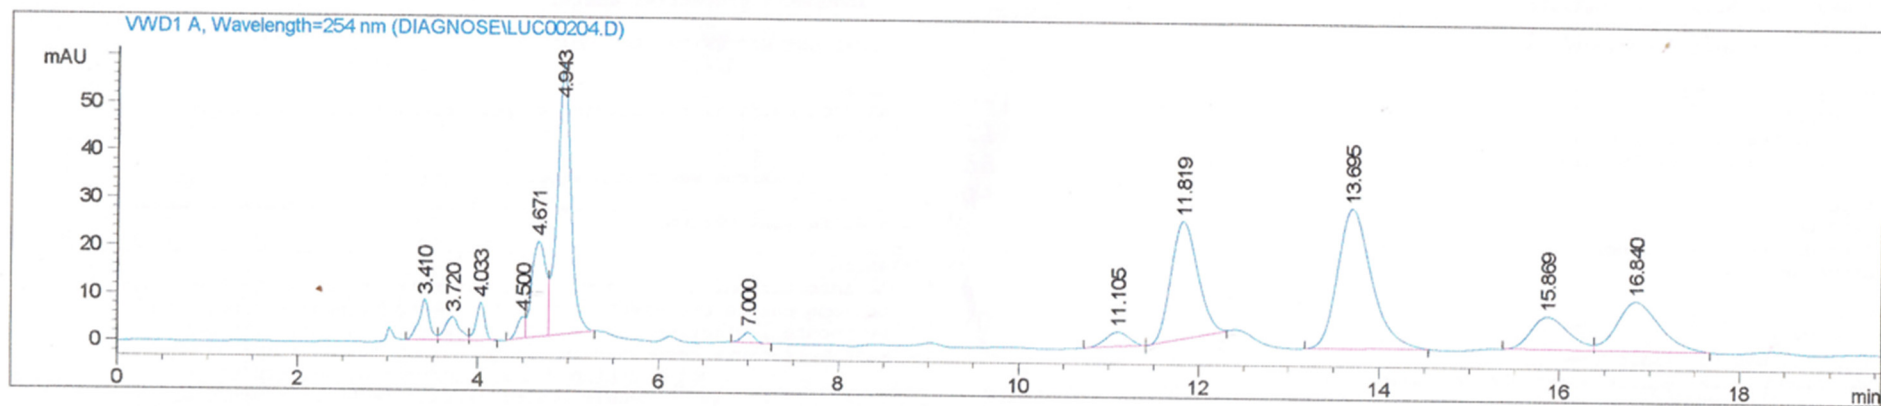

Figure S21. HPLC Chromatogram of *Erythro/Threo* mixture, entry 2 table 1.

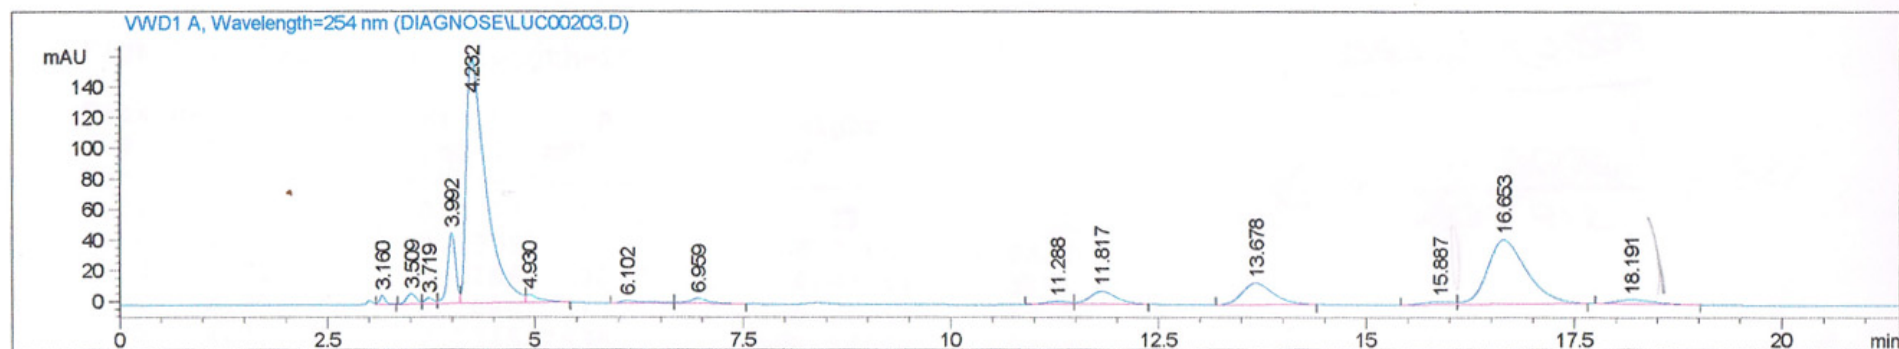

Figure S22. HPLC Chromatogram of *Erythro/Threo* mixture, entry 1 of Table 3.

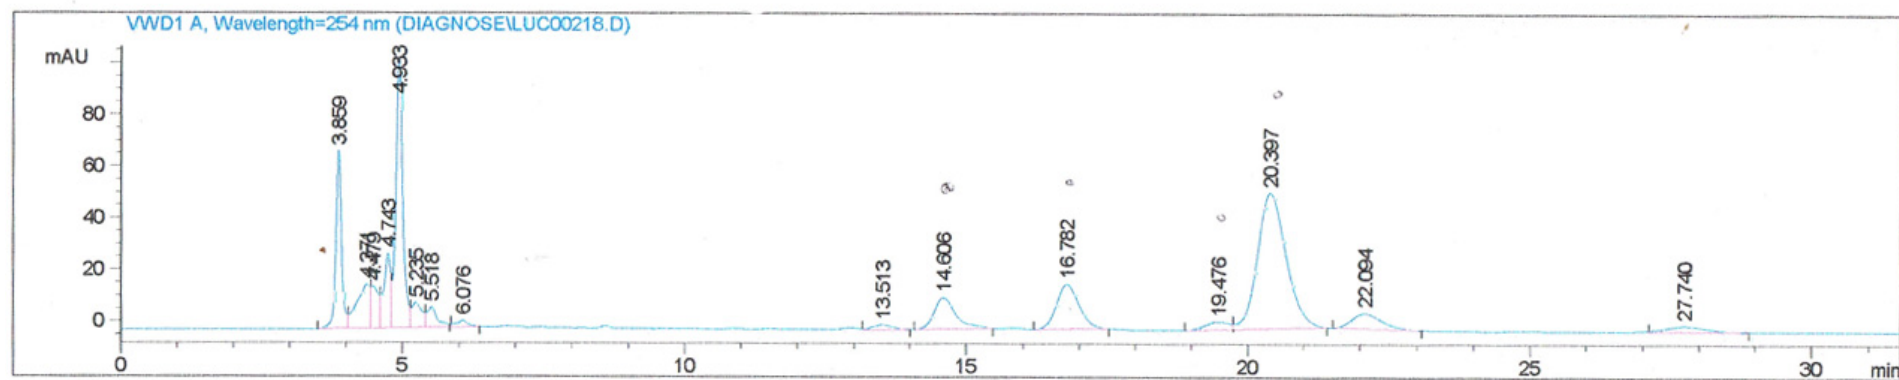

Figure S23. HPLC Chromatogram of *Erythro/Threo* mixture, entry 3 of Table 3.

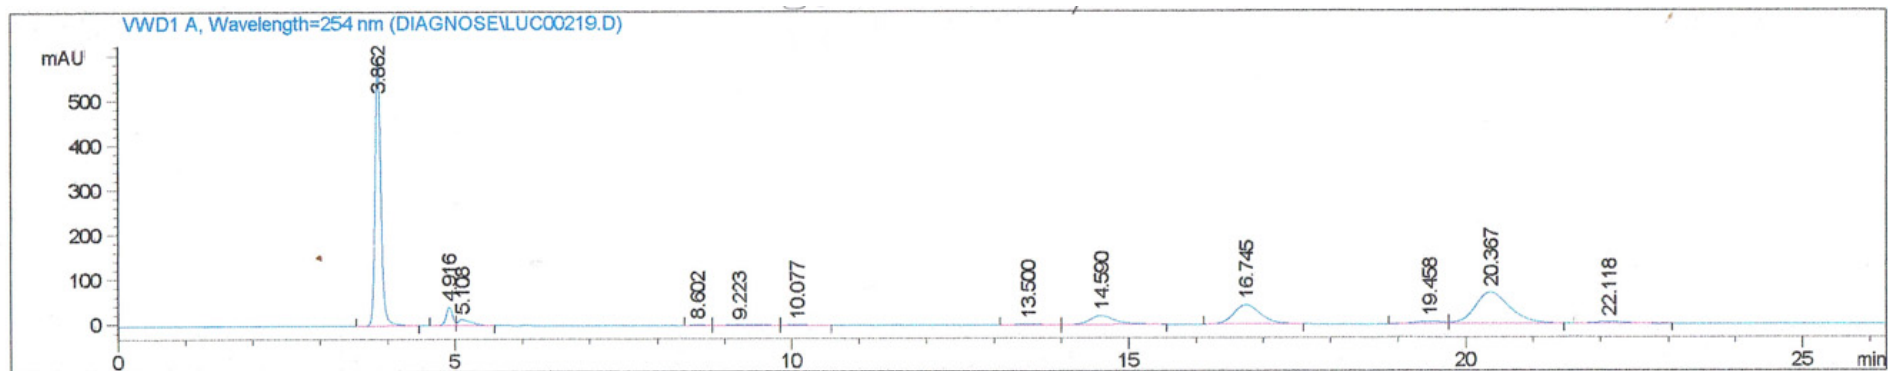

Figure S24. HPLC Chromatogram of *Erythro/Threo* mixture, entry 4 of Table 3.

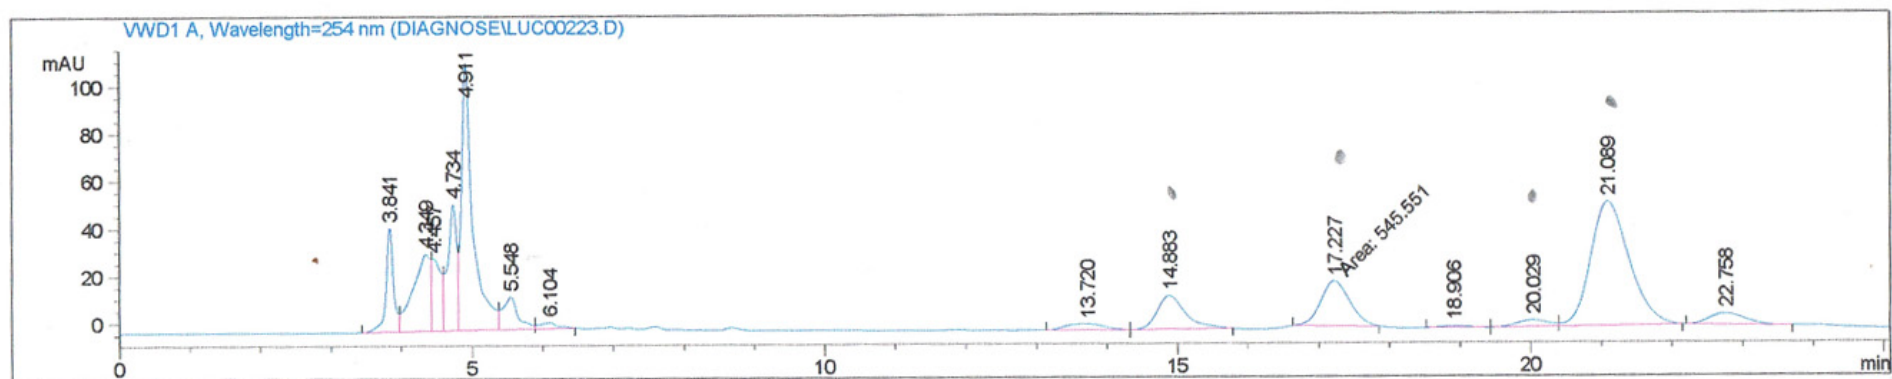

Figure S25. HPLC Chromatogram of *Erythro/Threo* mixture, entry 5 of Table 3.

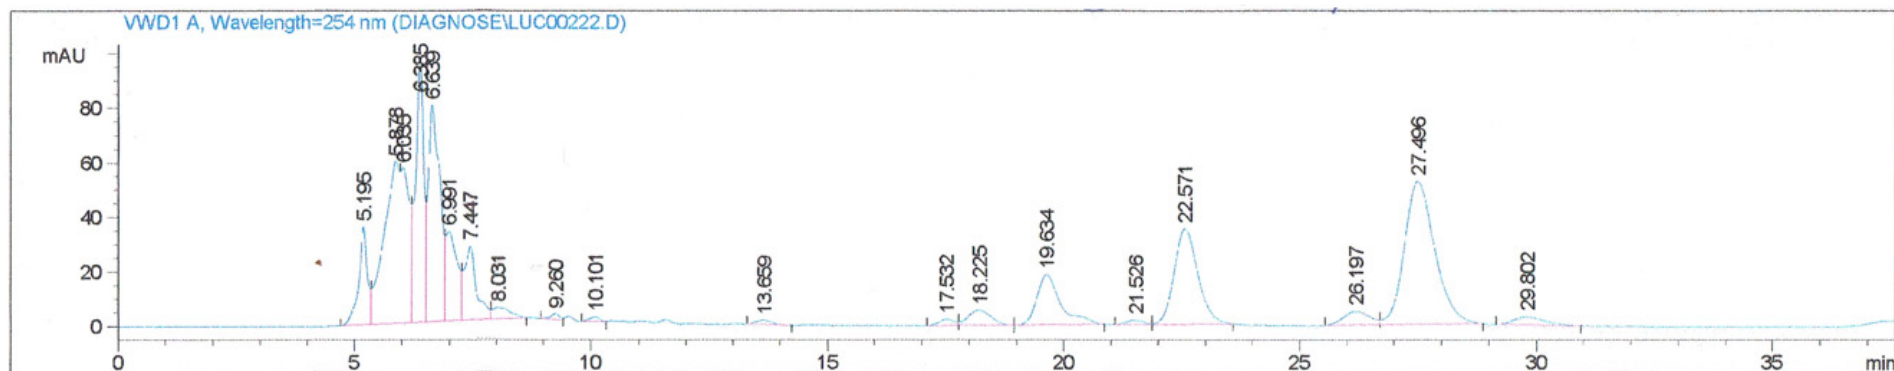

Figure S26. HPLC Chromatogram of *Erythro/Threo* mixture, entry 6 of Table 3.

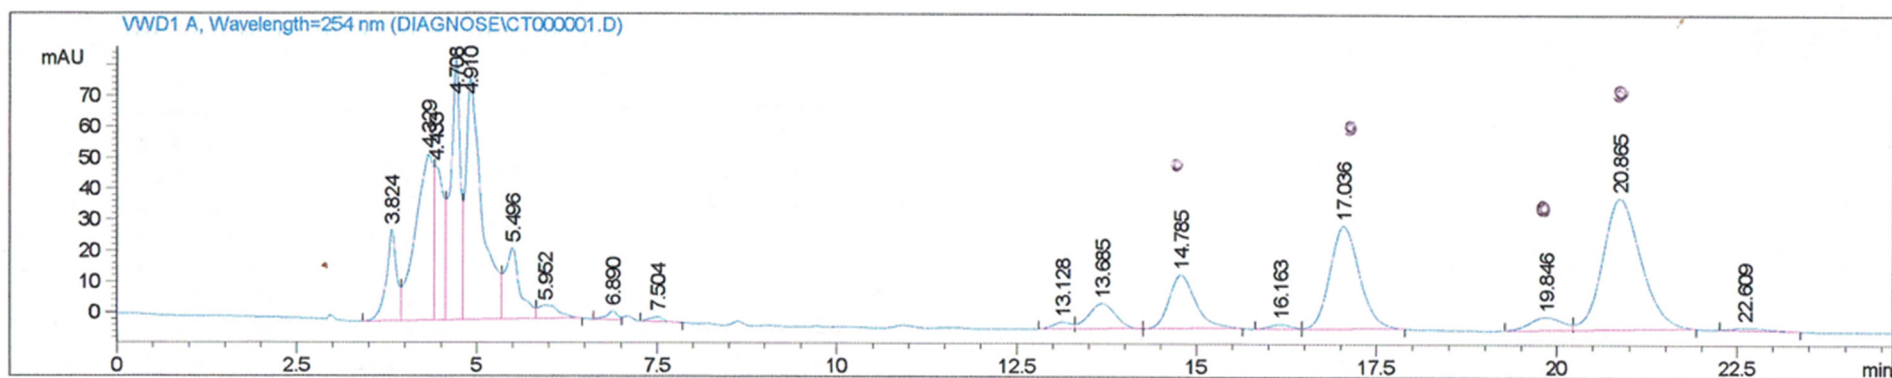

Figure S27. HPLC Chromatogram of *Erythro/Threo* mixture, entry 2 of Table 4.



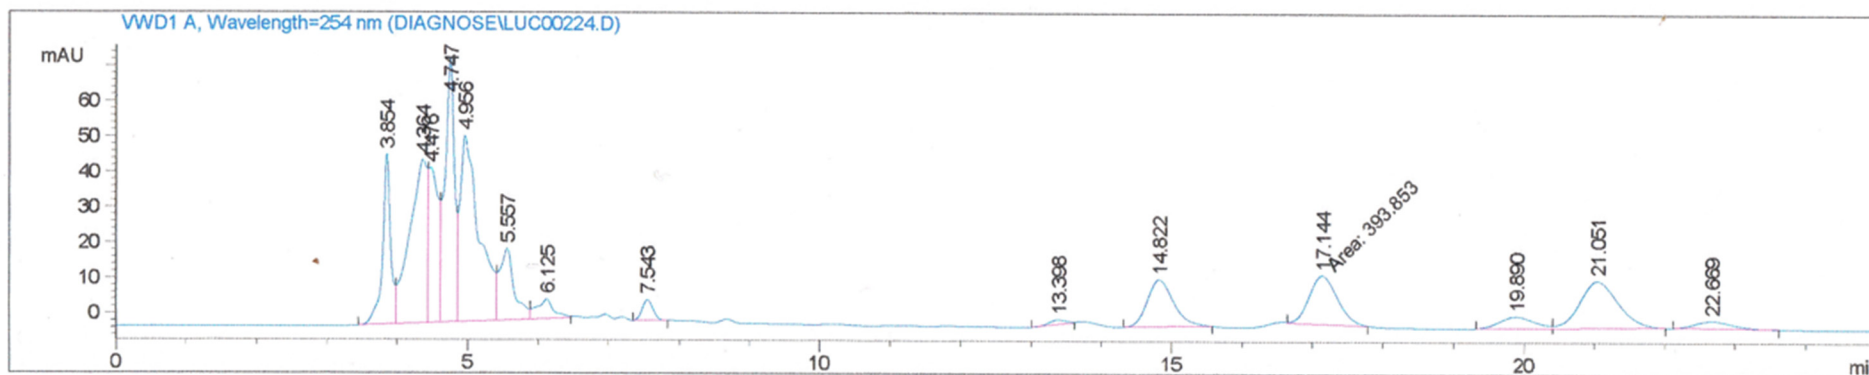

**Figure S28.** HPLC Chromatogram of *Erythro/Threo* mixture, entry 3 of Table 4.

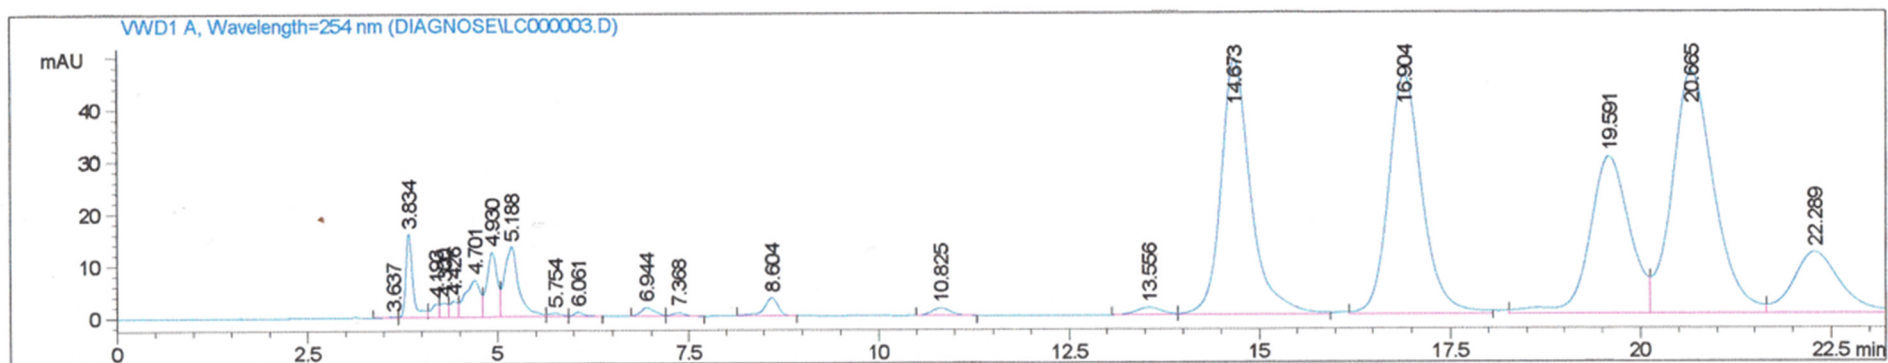

**Figure S29.** HPLC Chromatogram of *Erythro/Threo* mixture, entry 4 of Table 4.

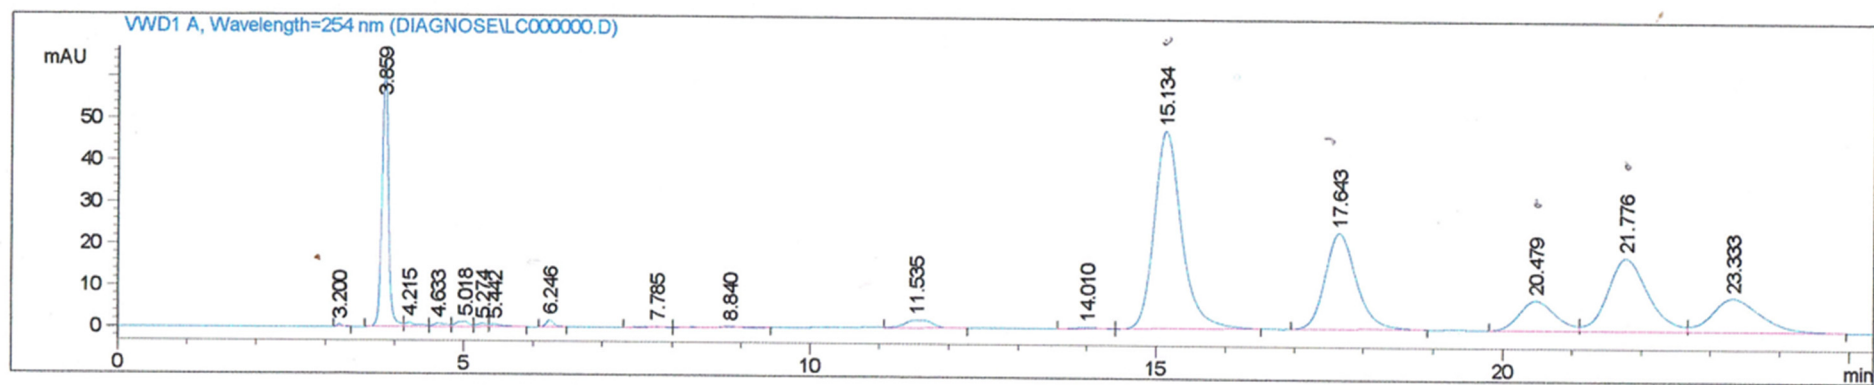

Figure S30. HPLC Chromatogram of *Erythro/Threo* mixture, entry 5 of Table 4.

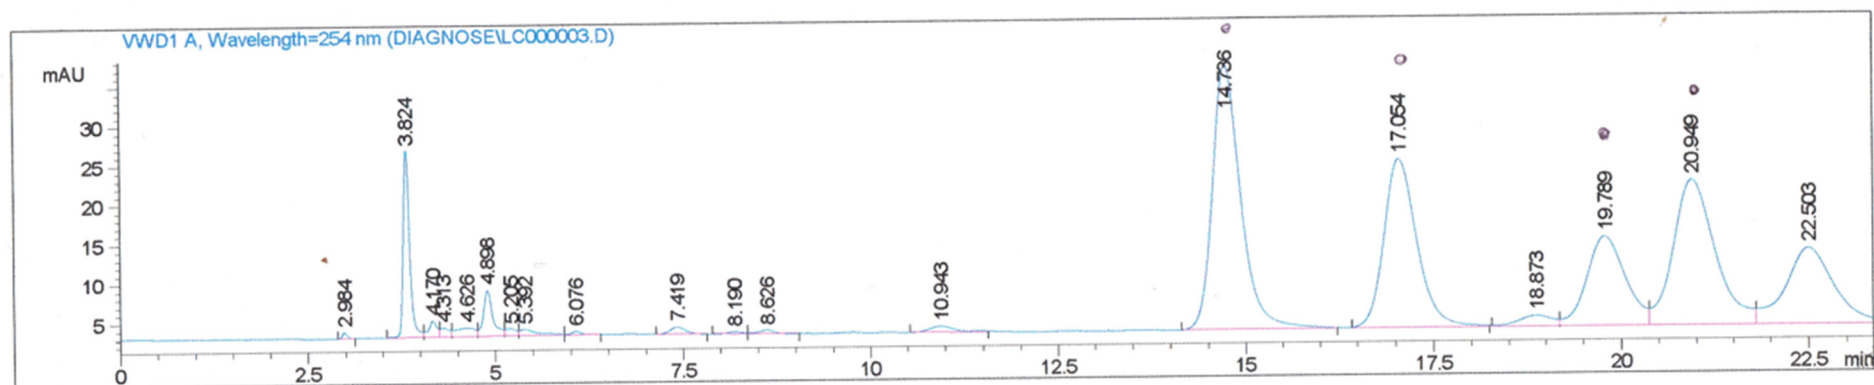

Figure S31. HPLC Chromatogram of *Erythro/Threo* mixture, entry 6 of Table 4.

## Computational Details

Computational studies have been performed using the DFT method incorporated in the Gaussian 16 package[4], and using b3lyp/6-31G(d,p) level of theory in benzaldehyde as solvent. The starting structure for DFT calculations were obtained by molecular mechanics calculation performed by YASARA software. All optimized structures were characterized by 0 imaginary frequency.

The non-covalent interaction (NCI) investigations were carried out with the Multiwfn program<sup>13</sup> and its plot was graphed with VMD program[14] Plots describe the RDG values versus the electron density multiplied by the sign of the second Hessian eigenvalue ( $s = 0.5$  a.u.; left) and gradient isosurfaces ( $s = 0.4$  a.u.; right) for the complexes.

The coloring scheme was chosen to assist in distinguishing the amplitude of the electron density corresponding to different types of interactions. Marked in green color represent medium-strong (cation $\cdots\pi$ , Van der Waals and C-H $\cdots\pi$ ) interactions whereas the red color represents the repulsive ones. The coordination energy of benzaldehyde to organocatalyst is calculated according to eqn 1:

$$E_{\text{Coord}} = E_{\text{C/A}} - E^0_{\text{C}} - E^0_{\text{A}}$$

where  $E_{\text{C/A}}$  is the energy of the system composed by an aldehyde molecule bonded to the organocatalyst, while  $E^0_{\text{A}}$  and  $E^0_{\text{C}}$  are the total energies of the free reactants, aldehyde and organocatalysts, respectively.

**Table S1.** Relative stabilities between isomers of Figure 5

| Systems                     | $\Delta E_{\text{isomer}}^{[a]}$<br>(kcal/mol) | $E_{\text{coord}}$<br>(kcal/mol) |
|-----------------------------|------------------------------------------------|----------------------------------|
| 7-cis-cis                   | 1.77                                           | -                                |
| 7-trans-cis                 | 2.41                                           | -                                |
| 7-trans-trans               | 0.00                                           | -                                |
| 8-cis-cis                   | 0.00                                           | -                                |
| 8-trans-cis                 | 5.33                                           | -                                |
| 8-trans-trans               | 8.07                                           | -                                |
| 5@8-cis-cis                 | -                                              | -8.9                             |
| (5) <sub>2</sub> @8-cis-cis | -                                              | -12.9                            |

[a]  $\Delta E_{\text{isomer}}$  is calculated assuming as zero the energy of most stable conformer.

## Atomic Coordinates

### 2-cis-A

|   |         |         |         |
|---|---------|---------|---------|
| C | -4.1341 | -3.1117 | 0.6411  |
| C | -3.3039 | -2.0989 | 0.076   |
| C | -3.5717 | -1.6907 | -1.2693 |
| C | -4.6408 | -2.2874 | -1.9847 |
| C | -5.4274 | -3.2694 | -1.3909 |
| C | -5.1752 | -3.6792 | -0.0882 |
| C | -2.2187 | -1.4927 | 0.799   |
| C | -1.4453 | -0.5091 | 0.1532  |
| C | -1.7114 | -0.1327 | -1.1633 |
| C | -2.7626 | -0.7012 | -1.8688 |
| C | -3.3822 | -1.4358 | 5.6745  |
| C | -2.5163 | -1.8458 | 4.6294  |
| C | -2.7993 | -1.4646 | 3.2806  |
| C | -3.9518 | -0.6554 | 3.0492  |
| C | -4.7806 | -0.2644 | 4.097   |
| C | -4.4999 | -0.6546 | 5.3997  |
| C | -1.372  | -2.6207 | 4.9029  |
| C | -0.5198 | -2.996  | 3.8748  |
| C | -0.7691 | -2.6436 | 2.545   |
| C | -1.9224 | -1.8894 | 2.2221  |
| N | -0.337  | 0.0454  | 0.8203  |
| C | -0.0232 | 1.342   | 1.1158  |
| N | 1.1828  | 1.4243  | 1.7552  |
| S | -0.9979 | 2.6592  | 0.7473  |
| C | 1.842   | 2.5211  | 2.3361  |
| N | 0.1504  | -3.0369 | 1.5374  |
| C | -0.3092 | -4.1389 | 0.6956  |
| C | 1.5731  | -3.0908 | 1.8719  |
| C | 1.2101  | 3.3554  | 3.266   |
| C | 1.9029  | 4.4229  | 3.8513  |
| C | 3.2442  | 4.6333  | 3.5076  |
| C | 3.8954  | 3.794   | 2.5943  |
| C | 3.1838  | 2.7357  | 2.0136  |
| C | 1.222   | 5.3381  | 4.87    |
| C | 5.3569  | 4.0495  | 2.2216  |
| F | 2.0561  | 5.6222  | 5.8721  |
| F | 0.8752  | 6.4768  | 4.2709  |
| F | 0.1269  | 4.7797  | 5.3899  |
| F | 6.1428  | 3.4516  | 3.1166  |
| F | 5.6461  | 3.5657  | 1.0119  |
| F | 5.6291  | 5.3561  | 2.2213  |
| H | -3.9563 | -3.4471 | 1.6525  |
| H | -4.8414 | -1.9767 | -3.0001 |
| H | -6.2391 | -3.7187 | -1.9459 |
| H | -5.7926 | -4.4439 | 0.3616  |
| H | -1.0962 | 0.6157  | -1.6426 |
| H | -2.9617 | -0.3933 | -2.8855 |
| H | -3.1656 | -1.7284 | 6.6921  |
| H | -4.1896 | -0.3327 | 2.0458  |
| H | -5.6479 | 0.3483  | 3.8958  |
| H | -5.1518 | -0.3435 | 6.2037  |
| H | -1.1561 | -2.9112 | 5.9218  |
| H | 0.3481  | -3.5873 | 4.1235  |

|   |         |         |         |
|---|---------|---------|---------|
| H | 0.213   | -0.6602 | 1.288   |
| H | 1.7473  | 0.5898  | 1.7139  |
| H | -1.3552 | -4.0321 | 0.4089  |
| H | 0.2676  | -4.1811 | -0.2292 |
| H | -0.2128 | -5.0933 | 1.2151  |
| H | 1.8648  | -2.239  | 2.4885  |
| H | 1.8248  | -4.004  | 2.4129  |
| H | 2.1772  | -3.0478 | 0.9646  |
| H | 0.1757  | 3.1717  | 3.5245  |
| H | 3.7854  | 5.4559  | 3.9581  |
| H | 3.6744  | 2.085   | 1.3024  |

Energy = -2356.738413 a.u.

0 imaginary frequency

### 2-trans-A

|   |         |         |         |
|---|---------|---------|---------|
| C | -4.5452 | 0.7849  | -3.3783 |
| C | -4.0267 | 1.8609  | -2.5978 |
| C | -3.6447 | 3.0584  | -3.2834 |
| C | -3.8081 | 3.1448  | -4.6890 |
| C | -4.3284 | 2.0730  | -5.4074 |
| C | -4.6913 | 0.9012  | -4.7574 |
| C | -3.8701 | 1.7806  | -1.1705 |
| C | -3.3126 | 2.8854  | -0.4933 |
| C | -2.9297 | 4.035   | -1.1772 |
| C | -3.1022 | 4.1359  | -2.5502 |
| C | -7.4371 | -1.2246 | 0.6684  |
| C | -6.0643 | -0.9152 | 0.5015  |
| C | -5.6812 | 0.2379  | -0.2529 |
| C | -6.7232 | 1.0432  | -0.8049 |
| C | -8.063  | 0.7109  | -0.6268 |
| C | -8.4175 | -0.4153 | 0.1037  |
| C | -5.0676 | -1.7305 | 1.0731  |
| C | -3.7266 | -1.4203 | 0.9027  |
| C | -3.3169 | -0.3025 | 0.17    |
| C | -4.2843 | 0.5451  | -0.4181 |
| N | -3.0578 | 2.8679  | 0.8874  |
| C | -3.9332 | 3.0264  | 1.9155  |
| N | -5.2609 | 3.0901  | 1.5943  |
| S | -3.2969 | 3.1031  | 3.4515  |
| C | -6.3622 | 3.2827  | 2.4361  |
| N | -1.9312 | -0.0387 | 0.0201  |
| C | -1.0462 | -0.3216 | 1.1487  |
| C | -1.3881 | -0.3992 | -1.2866 |
| C | -6.5629 | 4.5035  | 3.0859  |
| C | -7.6871 | 4.6926  | 3.9005  |
| C | -8.6061 | 3.6452  | 4.0491  |
| C | -8.4152 | 2.4193  | 3.396   |
| C | -7.2846 | 2.2481  | 2.5893  |
| C | -7.9273 | 6.0149  | 4.6292  |
| C | -9.4082 | 1.269   | 3.5675  |
| F | -6.9559 | 6.9029  | 4.4059  |
| F | -9.0811 | 6.5436  | 4.2199  |
| F | -8.0026 | 5.7944  | 5.9422  |

|   |          |         |         |
|---|----------|---------|---------|
| F | -8.7621  | 0.1158  | 3.7471  |
| F | -10.2167 | 1.4586  | 4.6124  |
| F | -10.1564 | 1.1728  | 2.4685  |
| H | -4.8296  | -0.1397 | -2.8972 |
| H | -3.5184  | 4.0494  | -5.2044 |
| H | -4.4465  | 2.1486  | -6.4791 |
| H | -5.0882  | 0.0733  | -5.3275 |
| H | -2.4947  | 4.8654  | -0.6377 |
| H | -2.8084  | 5.038   | -3.0681 |
| H | -7.721   | -2.0975 | 1.2395  |
| H | -6.4787  | 1.9217  | -1.3839 |
| H | -8.8352  | 1.3309  | -1.0611 |
| H | -9.462   | -0.6618 | 0.2369  |
| H | -5.3543  | -2.603  | 1.6435  |
| H | -2.9905  | -2.0764 | 1.3414  |
| H | -2.0864  | 2.7863  | 1.1498  |
| H | -5.4878  | 2.8191  | 0.6485  |
| H | -1.506   | -0.015  | 2.0902  |
| H | -0.8007  | -1.3825 | 1.2147  |
| H | -0.1187  | 0.2448  | 1.0529  |
| H | -1.2778  | -1.4807 | -1.3756 |
| H | -2.0352  | -0.0707 | -2.1002 |
| H | -0.4155  | 0.0692  | -1.4431 |
| H | -5.8345  | 5.2929  | 2.9575  |
| H | -9.4745  | 3.7921  | 4.678   |
| H | -7.1167  | 1.3039  | 2.0895  |

Energy = -2356.741769 a.u.

0 imaginary frequency

## 2-cis-B

|   |         |         |         |
|---|---------|---------|---------|
| C | 0.026   | -0.9561 | 0.7967  |
| C | 0.2118  | -2.0108 | 1.7388  |
| C | -0.2536 | -3.3158 | 1.3758  |
| C | -0.848  | -3.5223 | 0.1053  |
| C | -0.9973 | -2.4644 | -0.7856 |
| C | -0.5671 | -1.1906 | -0.4406 |
| C | 0.8219  | -1.8049 | 3.0248  |
| C | 0.9338  | -2.9091 | 3.8945  |
| C | 0.43    | -4.1596 | 3.5461  |
| C | -0.133  | -4.3777 | 2.2976  |
| C | 4.0492  | 2.0333  | 2.6572  |
| C | 2.9179  | 1.4382  | 3.2704  |
| C | 2.4543  | 0.16    | 2.8251  |
| C | 3.1731  | -0.4671 | 1.7648  |
| C | 4.2799  | 0.143   | 1.1809  |
| C | 4.7159  | 1.3837  | 1.6246  |
| C | 2.2424  | 2.0938  | 4.3172  |
| C | 1.1347  | 1.5073  | 4.9089  |
| C | 0.6522  | 0.2621  | 4.4964  |
| C | 1.3035  | -0.4388 | 3.4516  |
| N | 1.4401  | -2.7392 | 5.1893  |
| C | 2.6185  | -3.1222 | 5.7625  |
| N | 3.5581  | -3.894  | 5.1453  |

|   |         |         |         |
|---|---------|---------|---------|
| S | 2.9342  | -2.6101 | 7.2992  |
| C | 3.5279  | -4.5479 | 3.9164  |
| N | -0.4957 | -0.2778 | 5.1325  |
| C | -0.6716 | -0.048  | 6.5666  |
| C | -1.7224 | -0.1755 | 4.3466  |
| C | 3.1578  | -5.8927 | 3.8665  |
| C | 3.1369  | -6.5738 | 2.6438  |
| C | 3.5312  | -5.898  | 1.4809  |
| C | 3.9346  | -4.5565 | 1.5269  |
| C | 3.9357  | -3.8856 | 2.7579  |
| C | 2.7002  | -8.0383 | 2.5958  |
| C | 4.3965  | -3.8498 | 0.2525  |
| F | 1.3737  | -8.0965 | 2.7096  |
| F | 3.055   | -8.6314 | 1.4544  |
| F | 3.2449  | -8.7186 | 3.6058  |
| F | 3.3496  | -3.2703 | -0.3309 |
| F | 5.3079  | -2.914  | 0.5235  |
| F | 4.9385  | -4.7123 | -0.6099 |
| H | 0.3493  | 0.0452  | 1.0417  |
| H | -1.1957 | -4.5084 | -0.1674 |
| H | -1.4568 | -2.6306 | -1.7498 |
| H | -0.6947 | -0.3746 | -1.138  |
| H | 0.4828  | -4.9759 | 4.252   |
| H | -0.5012 | -5.3588 | 2.0324  |
| H | 4.3929  | 3.0001  | 2.997   |
| H | 2.8491  | -1.427  | 1.3933  |
| H | 4.8037  | -0.348  | 0.3733  |
| H | 5.5759  | 1.8478  | 1.1617  |
| H | 2.5917  | 3.059   | 4.6561  |
| H | 0.6334  | 2.0459  | 5.6975  |
| H | 0.9095  | -2.0723 | 5.7332  |
| H | 4.3804  | -4.0756 | 5.7033  |
| H | -1.3684 | -0.7745 | 6.9855  |
| H | 0.2723  | -0.1679 | 7.1025  |
| H | -1.0529 | 0.9537  | 6.7704  |
| H | -2.4602 | -0.8995 | 4.6946  |
| H | -2.1509 | 0.8254  | 4.4188  |
| H | -1.5511 | -0.3844 | 3.2899  |
| H | 2.8669  | -6.4022 | 4.7752  |
| H | 3.5241  | -6.4173 | 0.5311  |
| H | 4.2467  | -2.8513 | 2.8213  |

Energy = -2356.737794 a.u.

0 imaginary frequency

## 2-trans-B

|   |        |         |        |
|---|--------|---------|--------|
| C | 3.7978 | 1.9161  | 0.2557 |
| C | 3.5492 | 0.6639  | 0.892  |
| C | 4.1073 | 0.4535  | 2.1938 |
| C | 4.8826 | 1.4754  | 2.799  |
| C | 5.1004 | 2.6812  | 2.1396 |
| C | 4.5617 | 2.9     | 0.8782 |
| C | 2.7643 | -0.3739 | 0.2831 |
| C | 2.5321 | -1.5582 | 1.0081 |

|   |         |         |         |
|---|---------|---------|---------|
| C | 3.1072  | -1.7598 | 2.2628  |
| C | 3.8814  | -0.7729 | 2.8565  |
| C | -1.1408 | 0.3688  | -2.785  |
| C | 0.2501  | 0.1621  | -2.6028 |
| C | 0.7801  | 0.0123  | -1.2823 |
| C | -0.1351 | 0.0872  | -0.1895 |
| C | -1.4978 | 0.2756  | -0.4021 |
| C | -1.9973 | 0.4152  | -1.6902 |
| C | 1.1202  | 0.0977  | -3.7095 |
| C | 2.4756  | -0.1306 | -3.5213 |
| C | 3.0241  | -0.2942 | -2.2453 |
| C | 2.1916  | -0.2092 | -1.1038 |
| N | 1.7471  | -2.5421 | 0.3921  |
| C | 0.7418  | -3.3483 | 0.8476  |
| N | 0.0767  | -4.0502 | -0.1072 |
| S | 0.1838  | -3.4823 | 2.4075  |
| C | 0.299   | -4.0255 | -1.4852 |
| N | 4.4098  | -0.5664 | -2.1155 |
| C | 5.333   | 0.117   | -3.0213 |
| C | 4.7318  | -1.9717 | -1.8781 |
| C | -0.6905 | -3.4971 | -2.3126 |
| C | -0.473  | -3.3969 | -3.6919 |
| C | 0.7419  | -3.8425 | -4.2263 |
| C | 1.7355  | -4.3853 | -3.4024 |
| C | 1.5034  | -4.4837 | -2.0257 |
| C | -1.519  | -2.7766 | -4.6123 |
| C | 3.06    | -4.8284 | -4.0141 |
| F | -1.9949 | -3.7114 | -5.432  |
| F | -2.5385 | -2.2479 | -3.9368 |
| F | -0.9607 | -1.8129 | -5.342  |
| F | 3.9626  | -5.1491 | -3.0871 |
| F | 2.8528  | -5.8906 | -4.789  |
| F | 3.5598  | -3.8445 | -4.7601 |
| H | 3.3885  | 2.1093  | -0.7255 |
| H | 5.305   | 1.3132  | 3.7811  |
| H | 5.6924  | 3.4539  | 2.6106  |
| H | 4.7382  | 3.8416  | 0.3767  |
| H | 2.9618  | -2.6919 | 2.7892  |
| H | 4.3134  | -0.9387 | 3.8338  |
| H | -1.537  | 0.4802  | -3.7851 |
| H | 0.2247  | -0.0139 | 0.8247  |
| H | -2.1726 | 0.3178  | 0.4419  |
| H | -3.0576 | 0.5644  | -1.8412 |
| H | 0.7221  | 0.2105  | -4.7089 |
| H | 3.1071  | -0.2032 | -4.3939 |
| H | 1.8084  | -2.5    | -0.6147 |
| H | -0.7646 | -4.5178 | 0.1995  |
| H | 5.0501  | 1.1633  | -3.1491 |
| H | 6.3424  | 0.1123  | -2.6077 |
| H | 5.3582  | -0.3525 | -4.006  |
| H | 4.0399  | -2.4422 | -1.1805 |
| H | 4.7024  | -2.5411 | -2.8074 |
| H | 5.7278  | -2.0649 | -1.443  |
| H | -1.6103 | -3.1312 | -1.8759 |
| H | 0.92    | -3.7551 | -5.2906 |
| H | 2.2594  | -4.8926 | -1.3685 |

Energy = -2356.737066 a.u.  
0 imaginary frequency

### 3-cis-A

|   |          |         |         |
|---|----------|---------|---------|
| C | -7.5139  | 0.7179  | 1.7318  |
| C | -8.7258  | 1.1143  | 2.3791  |
| C | -8.7186  | 2.2163  | 3.2711  |
| C | -7.5422  | 2.9167  | 3.52    |
| C | -6.359   | 2.5456  | 2.8944  |
| C | -7.5266  | -0.3997 | 0.8298  |
| C | -8.7379  | -1.0883 | 0.6037  |
| C | -9.9127  | -0.6741 | 1.2411  |
| C | -9.9149  | 0.4028  | 2.117   |
| C | -4.6579  | -0.579  | -3.2747 |
| C | -4.8637  | -0.9098 | -1.9119 |
| C | -6.0573  | -0.4834 | -1.25   |
| C | -6.9971  | 0.2832  | -2.0021 |
| C | -6.7659  | 0.5922  | -3.3398 |
| C | -5.6061  | 0.1626  | -3.9719 |
| C | -3.9036  | -1.6526 | -1.1958 |
| C | -4.1149  | -1.9667 | 0.139   |
| C | -5.2741  | -1.5706 | 0.8116  |
| C | -6.2654  | -0.8297 | 0.1296  |
| N | -8.7167  | -2.1675 | -0.3088 |
| C | -9.5741  | -3.1914 | -0.4524 |
| N | -9.1971  | -3.9801 | -1.474  |
| O | -10.5651 | -3.3864 | 0.2462  |
| C | -9.7847  | -5.1845 | -1.9056 |
| N | -5.4433  | -1.9293 | 2.1704  |
| C | -6.2666  | -3.1156 | 2.3847  |
| C | -4.2825  | -1.8188 | 3.0513  |
| C | -9.5608  | -5.5633 | -3.2322 |
| C | -10.093  | -6.7555 | -3.7405 |
| C | -10.8543 | -7.5755 | -2.8984 |
| C | -11.0805 | -7.2213 | -1.5626 |
| C | -10.5381 | -6.0268 | -1.073  |
| C | -9.8663  | -7.143  | -5.203  |
| C | -11.8854 | -8.1359 | -0.6372 |
| F | -10.8583 | -7.9068 | -5.6655 |
| F | -9.7819  | -6.0607 | -5.9789 |
| F | -8.7253  | -7.8245 | -5.2986 |
| F | -13.1468 | -7.709  | -0.5925 |
| F | -11.8806 | -9.399  | -1.069  |
| F | -11.3852 | -8.1223 | 0.5997  |
| H | -9.6363  | 2.512   | 3.7595  |
| H | -7.5473  | 3.7538  | 4.2039  |
| H | -5.4509  | 3.0961  | 3.097   |
| H | -10.8509 | -1.1773 | 1.0629  |
| H | -10.8325 | 0.7037  | 2.6022  |
| H | -3.7533  | -0.9017 | -3.7706 |
| H | -7.902   | 0.6387  | -1.5305 |
| H | -7.49    | 1.1759  | -3.8911 |
| H | -5.4363  | 0.4134  | -5.0098 |
| H | -2.9992  | -1.9746 | -1.6923 |

|   |          |         |         |
|---|----------|---------|---------|
| H | -3.3644  | -2.5438 | 0.6579  |
| H | -7.8887  | -2.1913 | -0.8797 |
| H | -8.4223  | -3.6526 | -2.0249 |
| H | -7.1521  | -3.1154 | 1.75    |
| H | -5.7092  | -4.0282 | 2.1689  |
| H | -6.6193  | -3.1533 | 3.4162  |
| H | -4.6058  | -1.7568 | 4.0908  |
| H | -3.6089  | -2.6703 | 2.9445  |
| H | -3.7201  | -0.9072 | 2.842   |
| H | -8.9757  | -4.9265 | -3.8814 |
| H | -11.2709 | -8.4971 | -3.2852 |
| H | -10.7033 | -5.7633 | -0.0377 |
| C | -6.3341  | 1.4681  | 2.0134  |
| H | -5.4009  | 1.1964  | 1.5421  |

Energy = -2033.788689 a.u.

0 imaginary frequency

### 3-trans-A

|   |         |         |         |
|---|---------|---------|---------|
| C | -4.5228 | 0.5042  | -1.0097 |
| C | -3.778  | -0.7006 | -0.83   |
| C | -4.2267 | -1.8677 | -1.529  |
| C | -5.3572 | -1.7877 | -2.3816 |
| C | -6.0431 | -0.5873 | -2.5351 |
| C | -5.6313 | 0.5489  | -1.8512 |
| C | -2.6194 | -0.7824 | 0.0222  |
| C | -1.9974 | -2.0397 | 0.1786  |
| C | -2.4549 | -3.166  | -0.4962 |
| C | -3.5414 | -3.089  | -1.3544 |
| C | -0.3078 | 3.6727  | -0.0935 |
| C | -0.9057 | 2.6216  | 0.6484  |
| C | -1.4714 | 1.4983  | -0.0338 |
| C | -1.3837 | 1.4825  | -1.461  |
| C | -0.7954 | 2.533   | -2.1613 |
| C | -0.2633 | 3.6212  | -1.4827 |
| C | -0.9449 | 2.6673  | 2.0556  |
| C | -1.5378 | 1.6392  | 2.7735  |
| C | -2.1125 | 0.5337  | 2.1403  |
| C | -2.083  | 0.4368  | 0.728   |
| N | -0.9542 | -2.2639 | 1.0839  |
| C | 0.3193  | -1.8588 | 1.0284  |
| N | 0.6523  | -1.0306 | 0.0256  |
| O | 1.1133  | -2.2609 | 1.8731  |
| C | 1.9455  | -0.6011 | -0.2976 |
| N | -2.7251 | -0.474  | 2.9282  |
| C | -4.1837 | -0.4141 | 2.9532  |
| C | -2.1019 | -0.8305 | 4.2022  |
| C | 3.0709  | -1.4309 | -0.2035 |
| C | 4.3392  | -0.9541 | -0.556  |

|   |         |         |         |
|---|---------|---------|---------|
| C | 4.472   | 0.3634  | -1.0153 |
| C | 3.3525  | 1.1985  | -1.1203 |
| C | 2.0966  | 0.7022  | -0.7631 |
| C | 5.5478  | -1.8789 | -0.4434 |
| C | 3.4677  | 2.6386  | -1.6091 |
| F | 6.6383  | -1.3578 | -1.0061 |
| F | 5.8045  | -2.1052 | 0.8429  |
| F | 5.2888  | -3.0427 | -1.0382 |
| F | 2.7314  | 2.7927  | -2.7077 |
| F | 3.0071  | 3.4636  | -0.6709 |
| F | 4.7243  | 2.9817  | -1.8919 |
| H | -4.2269 | 1.4024  | -0.4863 |
| H | -5.6897 | -2.6703 | -2.9104 |
| H | -6.9056 | -0.5382 | -3.1855 |
| H | -6.1768 | 1.4745  | -1.9738 |
| H | -1.9671 | -4.1208 | -0.3538 |
| H | -3.8835 | -3.9723 | -1.8762 |
| H | 0.1181  | 4.5189  | 0.4282  |
| H | -1.7852 | 0.6503  | -2.0212 |
| H | -0.7481 | 2.5016  | -3.2414 |
| H | 0.196   | 4.4275  | -2.0382 |
| H | -0.5153 | 3.5135  | 2.5744  |
| H | -1.5637 | 1.719   | 3.85    |
| H | -1.1584 | -2.8968 | 1.8404  |
| H | -0.1109 | -0.6396 | -0.5038 |
| H | -4.5985 | -0.2259 | 1.9619  |
| H | -4.6022 | -1.3603 | 3.2989  |
| H | -4.5307 | 0.3856  | 3.6096  |
| H | -1.0157 | -0.8785 | 4.1036  |
| H | -2.3416 | -0.1104 | 4.986   |
| H | -2.4334 | -1.8186 | 4.5242  |
| H | 2.963   | -2.4494 | 0.1441  |
| H | 5.4488  | 0.7403  | -1.289  |
| H | 1.2381  | 1.3495  | -0.8317 |

Energy = -2033.789796 a.u.

0 imaginary frequency

### 3-cis-B

|   |         |         |         |
|---|---------|---------|---------|
| C | -3.2823 | -0.486  | 2.5869  |
| C | -2.1841 | -1.253  | 2.0959  |
| C | -1.4886 | -2.088  | 3.0257  |
| C | -1.8941 | -2.1197 | 4.3841  |
| C | -2.9679 | -1.3496 | 4.819   |
| C | -3.6577 | -0.54   | 3.9264  |
| C | -1.7673 | -1.2224 | 0.7202  |
| C | -0.6889 | -2.0381 | 0.3121  |
| C | -0.0268 | -2.8475 | 1.2432  |
| C | -0.409  | -2.8746 | 2.5764  |
| C | -4.8964 | -0.6682 | -3.1601 |

|   |         |         |         |
|---|---------|---------|---------|
| C | -4.0349 | -0.0937 | -2.1917 |
| C | -3.3656 | -0.9337 | -1.2475 |
| C | -3.6153 | -2.3373 | -1.3163 |
| C | -4.466  | -2.8715 | -2.2798 |
| C | -5.1007 | -2.0436 | -3.1961 |
| C | -3.8303 | 1.2994  | -2.1449 |
| C | -2.9912 | 1.8515  | -1.1885 |
| C | -2.317  | 1.0586  | -0.2558 |
| C | -2.484  | -0.3461 | -0.2742 |
| N | -0.318  | -2.0177 | -1.0527 |
| C | 0.3615  | -2.9709 | -1.7092 |
| N | 1.6911  | -3.0806 | -1.5382 |
| O | -0.2184 | -3.7414 | -2.4589 |
| C | 2.589   | -2.1966 | -0.9186 |
| N | -1.4694 | 1.6784  | 0.6958  |
| C | -1.883  | 2.9622  | 1.2593  |
| C | -0.0461 | 1.5775  | 0.395   |
| C | 3.6202  | -2.7445 | -0.1532 |
| C | 4.5725  | -1.9188 | 0.4576  |
| C | 4.4948  | -0.5334 | 0.2672  |
| C | 3.4799  | 0.0308  | -0.515  |
| C | 2.5265  | -0.8094 | -1.1055 |
| C | 5.7033  | -2.5197 | 1.2942  |
| C | 3.4496  | 1.5439  | -0.7322 |
| F | 6.8217  | -1.8018 | 1.1745  |
| F | 5.3372  | -2.5275 | 2.5753  |
| F | 5.9735  | -3.7723 | 0.9214  |
| F | 2.5507  | 1.9051  | -1.6501 |
| F | 3.1512  | 2.1486  | 0.4171  |
| F | 4.6483  | 1.9666  | -1.1359 |
| H | -3.8332 | 0.1542  | 1.9139  |
| H | -1.364  | -2.75   | 5.0839  |
| H | -3.2691 | -1.381  | 5.8566  |
| H | -4.4905 | 0.0539  | 4.2756  |
| H | 0.7964  | -3.4773 | 0.944   |
| H | 0.1158  | -3.5072 | 3.2785  |
| H | -5.3977 | -0.0295 | -3.8736 |
| H | -3.1364 | -3.0069 | -0.6163 |
| H | -4.6323 | -3.939  | -2.3176 |
| H | -5.7582 | -2.4721 | -3.9395 |
| H | -4.3348 | 1.9367  | -2.8578 |
| H | -2.8533 | 2.922   | -1.1851 |
| H | -1.0189 | -1.5776 | -1.6286 |
| H | 2.0806  | -3.9146 | -1.9477 |
| H | -2.9522 | 2.965   | 1.4775  |
| H | -1.3682 | 3.1423  | 2.204   |
| H | -1.6688 | 3.7899  | 0.5819  |
| H | 0.2261  | 0.5843  | 0.0412  |
| H | 0.2396  | 2.2931  | -0.3772 |
| H | 0.5474  | 1.7684  | 1.29    |
| H | 3.6788  | -3.817  | -0.0244 |
| H | 5.2332  | 0.1132  | 0.7248  |

|   |        |         |         |
|---|--------|---------|---------|
| H | 1.7475 | -0.3889 | -1.7261 |
|---|--------|---------|---------|

-----

Energy =-2033.775586 a.u.

0 imaginary frequency

### 3-trans-B

|   |         |         |         |
|---|---------|---------|---------|
| C | -3.5991 | 0.2423  | 0.0897  |
| C | -3.0562 | -0.2668 | 1.307   |
| C | -3.7609 | 0.0164  | 2.5197  |
| C | -4.9516 | 0.7861  | 2.4792  |
| C | -5.4421 | 1.2641  | 1.2684  |
| C | -4.7717 | 0.9934  | 0.0826  |
| C | -1.8513 | -1.0492 | 1.3545  |
| C | -1.4072 | -1.5456 | 2.5975  |
| C | -2.103  | -1.2421 | 3.7725  |
| C | -3.2588 | -0.4749 | 3.7425  |
| C | -0.4699 | -4.2465 | -2.2562 |
| C | -0.4158 | -2.9503 | -1.6844 |
| C | -1.1452 | -2.6707 | -0.486  |
| C | -1.9135 | -3.7305 | 0.0847  |
| C | -1.9386 | -4.9958 | -0.4961 |
| C | -1.2224 | -5.2518 | -1.658  |
| C | 0.3523  | -1.9307 | -2.2808 |
| C | 0.4069  | -0.6687 | -1.7065 |
| C | -0.285  | -0.3631 | -0.5302 |
| C | -1.0805 | -1.3541 | 0.0936  |
| N | -0.2444 | -2.3366 | 2.5837  |
| C | 0.2673  | -3.1667 | 3.5094  |
| N | 1.2957  | -3.9285 | 3.1038  |
| O | -0.1486 | -3.2853 | 4.6556  |
| C | 1.8752  | -3.9743 | 1.832   |
| N | -0.172  | 0.9391  | 0.0218  |
| C | -0.0875 | 2.0774  | -0.8935 |
| C | 0.6889  | 1.0481  | 1.1974  |
| C | 1.7944  | -5.1582 | 1.1001  |
| C | 2.3453  | -5.232  | -0.1854 |
| C | 2.9875  | -4.1075 | -0.7182 |
| C | 3.0881  | -2.9198 | 0.017   |
| C | 2.5306  | -2.8602 | 1.2988  |
| C | 2.2082  | -6.5014 | -1.0209 |
| C | 3.7601  | -1.6928 | -0.5904 |
| F | 2.0281  | -6.2042 | -2.307  |
| F | 3.3212  | -7.2214 | -0.903  |
| F | 1.1761  | -7.2438 | -0.6215 |
| F | 3.636   | -1.6807 | -1.917  |
| F | 3.2265  | -0.5682 | -0.1176 |
| F | 5.0543  | -1.7121 | -0.2825 |
| H | -3.0959 | 0.0467  | -0.8459 |
| H | -5.4799 | 1.0007  | 3.3977  |
| H | -6.351  | 1.8493  | 1.2483  |



|   |         |         |         |
|---|---------|---------|---------|
| H | -5.1643 | 1.3703  | -0.8518 |
| H | -1.7633 | -1.5877 | 4.7362  |
| H | -3.7846 | -0.2534 | 4.6609  |
| H | 0.0859  | -4.454  | -3.1604 |
| H | -2.4852 | -3.5586 | 0.9858  |
| H | -2.5228 | -5.7851 | -0.0426 |
| H | -1.2495 | -6.2389 | -2.0992 |
| H | 0.9087  | -2.1406 | -3.1845 |
| H | 1.0241  | 0.0796  | -2.1808 |
| H | 0.2237  | -2.3665 | 1.692   |
| H | 1.6749  | -4.546  | 3.8044  |
| H | -0.7615 | 1.9494  | -1.7423 |
| H | -0.3917 | 2.994   | -0.3862 |
| H | 0.9244  | 2.2125  | -1.2793 |
| H | 0.3737  | 1.892   | 1.8128  |
| H | 0.6392  | 0.1654  | 1.8335  |
| H | 1.731   | 1.198   | 0.9118  |
| H | 1.2822  | -6.0122 | 1.5225  |
| H | 3.4051  | -4.1549 | -1.7156 |
| H | 2.5984  | -1.9494 | 1.8786  |

Energy = -2033.784316 a.u.

0 imaginary frequency

### 7-cis-cis

|   |         |         |         |
|---|---------|---------|---------|
| C | -0.4914 | 5.944   | 0.1064  |
| C | -0.6468 | 4.7963  | 0.9347  |
| C | -0.4566 | 4.95    | 2.3473  |
| C | -0.1251 | 6.2272  | 2.8711  |
| C | 0.0172  | 7.3171  | 2.0416  |
| C | -0.1686 | 7.17    | 0.6467  |
| C | -0.988  | 3.5079  | 0.4057  |
| C | -1.115  | 2.4231  | 1.27    |
| C | -0.9024 | 2.5797  | 2.6662  |
| C | -0.5924 | 3.8108  | 3.1841  |
| N | -1.3505 | 1.1458  | 0.7123  |
| C | -2.0764 | 0.094   | 1.1995  |
| N | -1.8078 | -1.0463 | 0.4781  |
| S | -3.1476 | 0.1823  | 2.4961  |
| C | -2.4189 | -2.3135 | 0.5168  |
| C | -3.7874 | -2.5014 | 0.7516  |
| C | -4.3166 | -3.7908 | 0.7337  |
| C | -3.5163 | -4.9023 | 0.4678  |
| C | -2.1605 | -4.7038 | 0.2135  |
| C | -1.6097 | -3.4237 | 0.2417  |
| C | -5.7975 | -3.9812 | 0.9346  |
| C | -1.2848 | -5.8772 | -0.1376 |
| F | -6.0762 | -5.1706 | 1.5134  |
| F | -6.3341 | -3.0158 | 1.7101  |

|   |         |         |         |
|---|---------|---------|---------|
| F | -6.4661 | -3.9552 | -0.244  |
| F | -0.0114 | -5.6994 | 0.2788  |
| F | -1.7359 | -7.0253 | 0.4125  |
| F | -1.2334 | -6.0768 | -1.4763 |
| H | -0.637  | 5.8475  | -0.9641 |
| H | 0.0151  | 6.3277  | 3.9439  |
| H | 0.2702  | 8.2892  | 2.4535  |
| H | -0.0578 | 8.0324  | -0.0038 |
| H | -0.984  | 1.7151  | 3.3103  |
| H | -0.4301 | 3.9217  | 4.2525  |
| H | -0.947  | 1.0054  | -0.2118 |
| H | -0.9712 | -1.0043 | -0.099  |
| H | -4.4241 | -1.6532 | 0.9559  |
| H | -3.9375 | -5.8997 | 0.4687  |
| H | -0.5479 | -3.2878 | 0.0652  |
| C | -3.5769 | 4.095   | -0.8915 |
| C | -2.4732 | 3.6366  | -1.6613 |
| C | -2.6495 | 3.4639  | -3.0735 |
| C | -3.9094 | 3.7616  | -3.6568 |
| C | -4.9576 | 4.2062  | -2.8827 |
| C | -4.7879 | 4.371   | -1.4879 |
| C | -1.2011 | 3.3328  | -1.0676 |
| C | -0.1771 | 2.8704  | -1.8814 |
| C | -0.3497 | 2.7116  | -3.2804 |
| C | -1.5588 | 2.9994  | -3.858  |
| N | 1.1124  | 2.6132  | -1.3127 |
| C | 1.7367  | 1.4067  | -1.2644 |
| N | 3.0096  | 1.4774  | -0.774  |
| S | 0.9772  | -0.0342 | -1.7459 |
| C | 3.9244  | 0.4312  | -0.4959 |
| C | 4.1566  | -0.6203 | -1.3883 |
| C | 5.1012  | -1.5945 | -1.0668 |
| C | 5.8356  | -1.5266 | 0.1172  |
| C | 5.6137  | -0.4606 | 0.9873  |
| C | 4.6596  | 0.5121  | 0.6908  |
| C | 5.384   | -2.6976 | -2.0542 |
| C | 6.4387  | -0.3316 | 2.241   |
| F | 5.8175  | -3.82   | -1.4415 |
| F | 4.2902  | -3.0211 | -2.7754 |
| F | 6.3448  | -2.3354 | -2.9377 |
| F | 5.7566  | 0.2857  | 3.2306  |
| F | 6.8368  | -1.5337 | 2.7068  |
| F | 7.5585  | 0.3982  | 2.0233  |
| H | -3.4579 | 4.2194  | 0.1788  |
| H | -4.0311 | 3.6285  | -4.7281 |
| H | -5.9173 | 4.4285  | -3.3391 |
| H | -5.6203 | 4.7161  | -0.8825 |
| H | 0.4865  | 2.3629  | -3.8751 |
| H | -1.6943 | 2.8797  | -4.9289 |
| H | 1.5502  | 3.3991  | -0.8442 |
| H | 3.3165  | 2.3864  | -0.447  |
| H | 3.6028  | -0.68   | -2.3142 |

|   |        |         |        |
|---|--------|---------|--------|
| H | 6.5603 | -2.2936 | 0.3602 |
| H | 4.4751 | 1.3215  | 1.3889 |

---

Energy = -3674.921618 a.u.

0 imaginary frequency

### 7-trans-cis

|   |         |         |         |
|---|---------|---------|---------|
| C | -1.2881 | 4.7559  | -1.5176 |
| C | -1.1257 | 4.1319  | -0.2486 |
| C | -0.8251 | 4.9615  | 0.8813  |
| C | -0.7044 | 6.365   | 0.7035  |
| C | -0.868  | 6.9365  | -0.5383 |
| C | -1.1607 | 6.1208  | -1.6568 |
| C | -1.2361 | 2.711   | -0.0712 |
| C | -1.0374 | 2.1669  | 1.1958  |
| C | -0.7722 | 2.997   | 2.3165  |
| C | -0.6654 | 4.3545  | 2.1552  |
| N | -1.2069 | 0.7711  | 1.3564  |
| C | -0.4858 | -0.0966 | 2.1194  |
| N | -0.9637 | -1.3829 | 2.143   |
| S | 0.9312  | 0.266   | 2.9634  |
| C | -2.1763 | -1.9155 | 1.6501  |
| C | -3.3959 | -1.2358 | 1.7699  |
| C | -4.5661 | -1.8246 | 1.2892  |
| C | -4.5506 | -3.0959 | 0.7201  |
| C | -3.3359 | -3.778  | 0.6302  |
| C | -2.1539 | -3.1964 | 1.0801  |
| C | -5.8744 | -1.0962 | 1.4649  |
| C | -3.296  | -5.1306 | -0.0346 |
| F | -6.7945 | -1.4895 | 0.5599  |
| F | -6.404  | -1.3172 | 2.6907  |
| F | -5.7223 | 0.2407  | 1.3396  |
| F | -3.1806 | -5.0187 | -1.3776 |
| F | -2.2522 | -5.8715 | 0.3929  |
| F | -4.4233 | -5.8353 | 0.205   |
| C | -4.0151 | 2.3653  | -1.0087 |
| C | -2.9404 | 1.7124  | -1.6757 |
| C | -3.2455 | 0.8901  | -2.8096 |
| C | -4.5944 | 0.7601  | -3.2336 |
| C | -5.6105 | 1.4036  | -2.5638 |
| C | -5.3145 | 2.2093  | -1.4389 |
| C | -1.5789 | 1.8271  | -1.2339 |
| C | -0.5828 | 1.1164  | -1.9024 |
| C | -0.8875 | 0.3384  | -3.0502 |
| C | -2.1844 | 0.2304  | -3.4833 |
| N | 0.756   | 1.2706  | -1.4642 |
| C | 1.7352  | 0.3256  | -1.314  |
| N | 2.8765  | 0.8668  | -0.7707 |
| S | 1.5694  | -1.3037 | -1.7058 |

|   |         |         |         |
|---|---------|---------|---------|
| C | 4.1055  | 0.2283  | -0.4891 |
| C | 4.7401  | -0.6068 | -1.4161 |
| C | 5.9838  | -1.155  | -1.1076 |
| C | 6.6206  | -0.8687 | 0.1007  |
| C | 5.9894  | -0.0205 | 1.0084  |
| C | 4.7359  | 0.5218  | 0.7241  |
| C | 6.6368  | -2.0964 | -2.0856 |
| C | 6.6351  | 0.2652  | 2.3386  |
| F | 7.9852  | -2.0512 | -2.0018 |
| F | 6.2732  | -3.3803 | -1.8608 |
| F | 6.3002  | -1.8113 | -3.3627 |
| F | 6.3016  | 1.4888  | 2.8064  |
| F | 6.2589  | -0.6306 | 3.2802  |
| F | 7.9832  | 0.2125  | 2.2636  |
| H | -0.2965 | -2.0441 | 2.5186  |
| H | -1.5132 | 4.1427  | -2.3832 |
| H | -0.4788 | 6.9808  | 1.5699  |
| H | -0.7731 | 8.0106  | -0.6632 |
| H | -1.2871 | 6.5757  | -2.6347 |
| H | -0.662  | 2.5457  | 3.293   |
| H | -0.4656 | 4.9857  | 3.0163  |
| H | -1.8055 | 0.3471  | 0.6547  |
| H | -3.4385 | -0.2625 | 2.2426  |
| H | -5.4649 | -3.548  | 0.357   |
| H | -1.2142 | -3.7291 | 0.9874  |
| H | -3.8028 | 2.9867  | -0.1458 |
| H | -4.8095 | 0.1362  | -4.0969 |
| H | -6.6389 | 1.2935  | -2.8935 |
| H | -6.1199 | 2.7095  | -0.9099 |
| H | -0.0853 | -0.1609 | -3.5746 |
| H | -2.4109 | -0.3656 | -4.3627 |
| H | 0.9293  | 2.1684  | -1.0258 |
| H | 2.788   | 1.7852  | -0.3517 |
| H | 4.2729  | -0.8139 | -2.3682 |
| H | 7.5958  | -1.284  | 0.3215  |
| H | 4.2486  | 1.1693  | 1.4449  |

---

Energy = -3674.920594 a.u.

0 imaginary frequency

### 7-trans-trans

|   |         |        |         |
|---|---------|--------|---------|
| C | -1.9639 | 2.8306 | 0.1243  |
| C | -1.4487 | 1.9811 | -0.8954 |
| C | -2.0964 | 1.9857 | -2.1747 |
| C | -3.2239 | 2.8234 | -2.3806 |
| C | -3.7049 | 3.623  | -1.3683 |
| C | -3.0654 | 3.6256 | -0.1063 |
| C | -0.3278 | 1.1125 | -0.6753 |
| C | 0.113   | 0.2936 | -1.7122 |

|   |         |         |         |
|---|---------|---------|---------|
| C | -0.5059 | 0.3339  | -2.9891 |
| C | -1.5846 | 1.1529  | -3.2044 |
| N | 1.257   | -0.5105 | -1.4896 |
| C | 1.5051  | -1.7844 | -1.9028 |
| N | 2.7606  | -2.2538 | -1.604  |
| S | 0.4107  | -2.8107 | -2.6756 |
| C | 3.8967  | -1.571  | -1.1129 |
| C | 4.2631  | -0.301  | -1.5831 |
| C | 5.4142  | 0.3107  | -1.0911 |
| C | 6.2289  | -0.3315 | -0.158  |
| C | 5.8725  | -1.6051 | 0.2831  |
| C | 4.7117  | -2.223  | -0.1792 |
| C | 5.8365  | 1.6589  | -1.6171 |
| C | 6.7108  | -2.2908 | 1.332   |
| F | 6.2459  | 2.473   | -0.6186 |
| F | 6.8726  | 1.5502  | -2.4803 |
| F | 4.8378  | 2.2885  | -2.2718 |
| F | 6.3129  | -1.9557 | 2.5807  |
| F | 6.6302  | -3.6351 | 1.2389  |
| F | 8.0139  | -1.9512 | 1.2298  |
| C | 2.0031  | 2.8249  | -0.0658 |
| C | 1.4855  | 1.9323  | 0.915   |
| C | 2.1365  | 1.8739  | 2.1913  |
| C | 3.2705  | 2.6934  | 2.4321  |
| C | 3.754   | 3.5357  | 1.4561  |
| C | 3.1104  | 3.6013  | 0.1979  |
| C | 0.3586  | 1.0814  | 0.6584  |
| C | -0.0861 | 0.2207  | 1.6588  |
| C | 0.5361  | 0.1984  | 2.9346  |
| C | 1.6217  | 0.9985  | 3.1836  |
| N | -1.2376 | -0.5636 | 1.4052  |
| C | -1.4904 | -1.8544 | 1.7584  |
| N | -2.7544 | -2.2993 | 1.4573  |
| S | -0.3915 | -2.9255 | 2.4604  |
| C | -3.8973 | -1.5863 | 1.0308  |
| C | -4.235  | -0.3306 | 1.5584  |
| C | -5.3892 | 0.3139  | 1.1192  |
| C | -6.237  | -0.282  | 0.1845  |
| C | -5.9107 | -1.543  | -0.3113 |
| C | -4.7459 | -2.192  | 0.0958  |
| C | -5.7728 | 1.6536  | 1.6946  |
| C | -6.8439 | -2.2326 | -1.2737 |
| F | -6.1633 | 2.5132  | 0.7268  |
| F | -6.8091 | 1.5423  | 2.5572  |
| F | -4.7556 | 2.2331  | 2.3667  |
| F | -6.1789 | -3.0379 | -2.129  |
| F | -7.7412 | -3.0068 | -0.6203 |
| F | -7.5488 | -1.3472 | -2.0096 |
| H | 2.8437  | -3.256  | -1.7125 |
| H | -1.4792 | 2.8458  | 1.0946  |
| H | -3.705  | 2.8165  | -3.3548 |
| H | -4.5733 | 4.2528  | -1.5339 |

|   |         |         |         |
|---|---------|---------|---------|
| H | -3.4508 | 4.2546  | 0.6896  |
| H | -0.1169 | -0.2882 | -3.7834 |
| H | -2.0567 | 1.1767  | -4.1824 |
| H | 1.872   | -0.1579 | -0.7638 |
| H | 3.6664  | 0.2003  | -2.334  |
| H | 7.1261  | 0.1483  | 0.214   |
| H | 4.4353  | -3.2065 | 0.1841  |
| H | 1.5157  | 2.888   | -1.0328 |
| H | 3.7544  | 2.6383  | 3.4034  |
| H | 4.6272  | 4.1513  | 1.6478  |
| H | 3.4971  | 4.2648  | -0.5689 |
| H | 0.1442  | -0.4559 | 3.7012  |
| H | 2.0969  | 0.974   | 4.16    |
| H | -1.8578 | -0.1704 | 0.7053  |
| H | -2.8423 | -3.3053 | 1.5161  |
| H | -3.6108 | 0.1366  | 2.3087  |
| H | -7.129  | 0.229   | -0.1569 |
| H | -4.4857 | -3.1584 | -0.3214 |

Energy = -3674.924437 a.u.

0 imaginary frequency

### 8-cis-cis

|   |         |         |         |
|---|---------|---------|---------|
| C | -6.3009 | 1.1525  | 0.4644  |
| C | -5.1884 | 0.6518  | 1.2003  |
| C | -5.1919 | 0.8233  | 2.6238  |
| C | -6.2923 | 1.4668  | 3.2493  |
| C | -7.3533 | 1.9355  | 2.5078  |
| C | -7.3512 | 1.7763  | 1.1013  |
| C | -4.0776 | 0.0042  | 0.5684  |
| C | -2.9942 | -0.4233 | 1.3453  |
| C | -3.0124 | -0.2586 | 2.7589  |
| C | -4.0844 | 0.3424  | 3.3685  |
| N | -1.8847 | -0.975  | 0.6856  |
| C | -0.7112 | -1.4793 | 1.2225  |
| N | 0.277   | -1.5718 | 0.2504  |
| O | -0.5635 | -1.8068 | 2.3956  |
| C | 1.5354  | -2.1723 | 0.3735  |
| C | 1.9472  | -2.8935 | 1.5043  |
| C | 3.2145  | -3.4784 | 1.5234  |
| C | 4.0902  | -3.3658 | 0.4467  |
| C | 3.6743  | -2.6421 | -0.6728 |
| C | 2.4163  | -2.052  | -0.7162 |
| C | 3.61    | -4.3039 | 2.7196  |
| C | 4.6295  | -2.4796 | -1.8258 |
| F | 4.9518  | -4.3674 | 2.8706  |
| F | 3.097   | -3.8105 | 3.8682  |
| F | 3.1677  | -5.5804 | 2.6123  |
| F | 4.0163  | -2.0425 | -2.9458 |

|   |         |         |         |
|---|---------|---------|---------|
| F | 5.6168  | -1.5985 | -1.5404 |
| F | 5.238   | -3.6507 | -2.1299 |
| H | -6.3155 | 1.0387  | -0.6141 |
| H | -6.2783 | 1.5846  | 4.3296  |
| H | -8.1892 | 2.4273  | 2.9956  |
| H | -8.1874 | 2.1503  | 0.5178  |
| H | -2.1748 | -0.6235 | 3.3355  |
| H | -4.0878 | 0.4614  | 4.4485  |
| H | -1.9322 | -0.9414 | -0.3247 |
| H | 0.1267  | -1.0225 | -0.5927 |
| H | 1.2877  | -2.9773 | 2.355   |
| H | 5.0701  | -3.8256 | 0.4777  |
| H | 2.1136  | -1.5013 | -1.5998 |
| C | -5.6908 | -2.1376 | -0.6876 |
| C | -4.8677 | -1.2924 | -1.4819 |
| C | -4.8135 | -1.5315 | -2.8946 |
| C | -5.5913 | -2.5798 | -3.4543 |
| C | -6.3847 | -3.3733 | -2.6571 |
| C | -6.4284 | -3.1505 | -1.2608 |
| C | -4.0761 | -0.2349 | -0.9117 |
| C | -3.2761 | 0.5287  | -1.7537 |
| C | -3.2236 | 0.2852  | -3.1508 |
| C | -3.9727 | -0.7205 | -3.7037 |
| N | -2.4998 | 1.6043  | -1.2304 |
| C | -1.1207 | 1.5822  | -1.2781 |
| N | -0.5392 | 2.7357  | -0.7939 |
| O | -0.4864 | 0.6221  | -1.7292 |
| C | 0.8265  | 3.0071  | -0.6098 |
| C | 1.8483  | 2.1554  | -1.051  |
| C | 3.179   | 2.4962  | -0.8127 |
| C | 3.526   | 3.6795  | -0.164  |
| C | 2.5024  | 4.5301  | 0.2545  |
| C | 1.1661  | 4.2015  | 0.0433  |
| C | 4.2569  | 1.5192  | -1.2072 |
| C | 2.8465  | 5.8502  | 0.8931  |
| F | 5.4135  | 2.1405  | -1.5214 |
| F | 4.5311  | 0.6599  | -0.1981 |
| F | 3.8936  | 0.7707  | -2.2734 |
| F | 1.8777  | 6.2716  | 1.7363  |
| F | 3.9972  | 5.7835  | 1.5959  |
| F | 3.0083  | 6.8232  | -0.0346 |
| H | -5.7299 | -1.9792 | 0.3838  |
| H | -5.5437 | -2.7463 | -4.5269 |
| H | -6.9736 | -4.1733 | -3.0951 |
| H | -7.0484 | -3.7851 | -0.6348 |
| H | -2.589  | 0.9127  | -3.7663 |
| H | -3.9352 | -0.9047 | -4.7735 |
| H | -2.946  | 2.1836  | -0.531  |
| H | -1.1659 | 3.4846  | -0.5315 |
| H | 1.5972  | 1.2499  | -1.5795 |
| H | 4.5637  | 3.9338  | 0.0113  |
| H | 0.3881  | 4.8716  | 0.3935  |

-----  
Energy = -3029.033710 a.u.

0 imaginary frequency

### 8-trans-cis

|   |         |         |         |
|---|---------|---------|---------|
| C | 0.1911  | 4.4367  | 1.5262  |
| C | 0.3957  | 3.9511  | 0.2042  |
| C | 0.0885  | 4.8218  | -0.892  |
| C | -0.4046 | 6.1273  | -0.6302 |
| C | -0.5919 | 6.5658  | 0.6614  |
| C | -0.29   | 5.709   | 1.7466  |
| C | 0.885   | 2.6275  | -0.0582 |
| C | 1.066   | 2.2143  | -1.3795 |
| C | 0.7683  | 3.0879  | -2.4624 |
| C | 0.2894  | 4.349   | -2.2159 |
| N | 1.6133  | 0.9375  | -1.617  |
| C | 1.3663  | 0.1402  | -2.7173 |
| N | 2.0528  | -1.0692 | -2.7342 |
| O | 0.5889  | 0.4214  | -3.6226 |
| C | 3.1412  | -1.5261 | -1.9665 |
| C | 4.1966  | -0.6789 | -1.592  |
| C | 5.2706  | -1.1902 | -0.8675 |
| C | 5.3324  | -2.5416 | -0.5237 |
| C | 4.2933  | -3.3817 | -0.9187 |
| C | 3.2002  | -2.8837 | -1.627  |
| C | 6.4312  | -0.3013 | -0.4996 |
| C | 4.3077  | -4.8329 | -0.5124 |
| F | 6.7581  | -0.4296 | 0.8058  |
| F | 7.5389  | -0.6224 | -1.209  |
| F | 6.1749  | 1.0027  | -0.7302 |
| F | 3.658   | -5.0263 | 0.6589  |
| F | 3.7013  | -5.6162 | -1.4311 |
| F | 5.5648  | -5.2964 | -0.3471 |
| C | 3.5428  | 2.5546  | 1.228   |
| C | 2.5002  | 1.6918  | 1.6721  |
| C | 2.7833  | 0.7892  | 2.7492  |
| C | 4.0792  | 0.7776  | 3.3297  |
| C | 5.0668  | 1.6188  | 2.8702  |
| C | 4.7904  | 2.5156  | 1.8105  |
| C | 1.1979  | 1.6938  | 1.0744  |
| C | 0.2177  | 0.8165  | 1.5518  |
| C | 0.5036  | -0.0684 | 2.6289  |
| C | 1.7515  | -0.0728 | 3.2002  |
| N | -1.0468 | 0.8586  | 0.9355  |
| C | -2.1414 | 0.0415  | 1.1457  |
| N | -3.2168 | 0.3973  | 0.3391  |
| O | -2.1763 | -0.8886 | 1.9448  |
| C | -4.4705 | -0.2233 | 0.2566  |
| C | -4.8576 | -1.3134 | 1.0509  |

|   |         |         |         |
|---|---------|---------|---------|
| C | -6.1345 | -1.855  | 0.8975  |
| C | -7.0442 | -1.3425 | -0.0247 |
| C | -6.6504 | -0.258  | -0.8095 |
| C | -5.3823 | 0.2982  | -0.6764 |
| C | -6.5098 | -3.0612 | 1.719   |
| C | -7.5904 | 0.281   | -1.855  |
| F | -7.8464 | -3.1574 | 1.8944  |
| F | -6.1087 | -4.2108 | 1.1249  |
| F | -5.9414 | -3.037  | 2.9442  |
| F | -7.3551 | 1.5842  | -2.1262 |
| F | -7.471  | -0.3899 | -3.0255 |
| F | -8.8816 | 0.1725  | -1.473  |
| H | 1.6744  | -1.7055 | -3.4231 |
| H | 0.4211  | 3.7901  | 2.366   |
| H | -0.6313 | 6.7757  | -1.4723 |
| H | -0.9688 | 7.5661  | 0.8512  |
| H | -0.4378 | 6.0592  | 2.7639  |
| H | 0.9155  | 2.7375  | -3.4743 |
| H | 0.0639  | 5.0101  | -3.0481 |
| H | 2.0088  | 0.4859  | -0.8017 |
| H | 4.1884  | 0.3646  | -1.8785 |
| H | 6.1761  | -2.9334 | 0.0313  |
| H | 2.3928  | -3.5465 | -1.9185 |
| H | 3.3442  | 3.2489  | 0.4187  |
| H | 4.2768  | 0.0856  | 4.144   |
| H | 6.0563  | 1.598   | 3.3159  |
| H | 5.572   | 3.1779  | 1.4512  |
| H | -0.2725 | -0.7328 | 2.9777  |
| H | 1.9603  | -0.755  | 4.0198  |
| H | -1.1161 | 1.5616  | 0.2106  |
| H | -3.0978 | 1.1874  | -0.2794 |
| H | -4.1693 | -1.7155 | 1.7784  |
| H | -8.0359 | -1.7654 | -0.1213 |
| H | -5.1028 | 1.1457  | -1.2937 |

-----  
Energy = -3029.025215 a.u.

0 imaginary frequency

### 8-trans-trans

|   |         |        |         |
|---|---------|--------|---------|
| C | -1.8856 | 3.1158 | 0.2145  |
| C | -1.4807 | 2.2115 | -0.8077 |
| C | -2.222  | 2.2011 | -2.0346 |
| C | -3.3265 | 3.0794 | -2.1903 |
| C | -3.6957 | 3.9371 | -1.1788 |
| C | -2.9647 | 3.9528 | 0.0328  |
| C | -0.3752 | 1.3128 | -0.6413 |
| C | -0.0315 | 0.4492 | -1.6828 |
| C | -0.7621 | 0.4554 | -2.9031 |
| C | -1.8269 | 1.3051 | -3.0622 |

|   |         |         |         |
|---|---------|---------|---------|
| N | 1.0956  | -0.3823 | -1.5231 |
| C | 1.2948  | -1.6098 | -2.1223 |
| N | 2.5088  | -2.2213 | -1.8228 |
| O | 0.4849  | -2.1749 | -2.8487 |
| C | 3.6855  | -1.7125 | -1.2428 |
| C | 4.1428  | -0.4101 | -1.501  |
| C | 5.3373  | 0.0291  | -0.9351 |
| C | 6.1077  | -0.8109 | -0.1295 |
| C | 5.6598  | -2.1097 | 0.1043  |
| C | 4.4569  | -2.5605 | -0.4372 |
| C | 5.862   | 1.4086  | -1.2416 |
| C | 6.4458  | -3.017  | 1.0155  |
| F | 6.2212  | 2.0628  | -0.1143 |
| F | 6.9664  | 1.3506  | -2.0232 |
| F | 4.9574  | 2.1731  | -1.8867 |
| F | 6.0483  | -2.8931 | 2.3031  |
| F | 6.2954  | -4.3173 | 0.6815  |
| F | 7.7668  | -2.7383 | 0.9832  |
| C | 1.9256  | 3.1082  | -0.1553 |
| C | 1.5149  | 2.1734  | 0.8366  |
| C | 2.2578  | 2.1159  | 2.0612  |
| C | 3.3696  | 2.9797  | 2.2445  |
| C | 3.7444  | 3.8677  | 1.2616  |
| C | 3.0117  | 3.9299  | 0.0525  |
| C | 0.4025  | 1.289   | 0.6417  |
| C | 0.0537  | 0.3935  | 1.6541  |
| C | 0.7858  | 0.3532  | 2.8728  |
| C | 1.8572  | 1.189   | 3.0588  |
| N | -1.0795 | -0.4244 | 1.4688  |
| C | -1.2845 | -1.6706 | 2.026   |
| N | -2.5046 | -2.2629 | 1.713   |
| O | -0.4744 | -2.2665 | 2.727   |
| C | -3.6852 | -1.7258 | 1.1679  |
| C | -4.126  | -0.4272 | 1.4701  |
| C | -5.3211 | 0.0412  | 0.9294  |
| C | -6.1089 | -0.7664 | 0.1077  |
| C | -5.6784 | -2.0628 | -0.1679 |
| C | -4.4742 | -2.5417 | 0.3458  |
| C | -5.8222 | 1.4213  | 1.2708  |
| C | -6.5444 | -2.9749 | -0.9978 |
| F | -6.1568 | 2.1148  | 0.1595  |
| F | -6.9361 | 1.3621  | 2.0388  |
| F | -4.9103 | 2.1492  | 1.9471  |
| F | -5.8133 | -3.8836 | -1.6789 |
| F | -7.4132 | -3.669  | -0.2254 |
| F | -7.2809 | -2.2874 | -1.8968 |
| H | 2.5086  | -3.198  | -2.0846 |
| H | -1.332  | 3.1389  | 1.1469  |
| H | -3.8788 | 3.0583  | -3.126  |
| H | -4.5452 | 4.6008  | -1.3057 |
| H | -3.2594 | 4.6304  | 0.8282  |
| H | -0.4734 | -0.2261 | -3.6906 |

|   |         |         |         |
|---|---------|---------|---------|
| H | -2.3822 | 1.3015  | -3.9961 |
| H | 1.6702  | -0.1679 | -0.7174 |
| H | 3.5818  | 0.2478  | -2.1518 |
| H | 7.0406  | -0.4646 | 0.2985  |
| H | 4.1155  | -3.5703 | -0.2374 |
| H | 1.3709  | 3.1671  | -1.0856 |
| H | 3.9229  | 2.9228  | 3.1781  |
| H | 4.5994  | 4.5198  | 1.4093  |
| H | 3.3108  | 4.6315  | -0.7202 |
| H | 0.493   | -0.3523 | 3.6373  |
| H | 2.4139  | 1.1495  | 3.9911  |
| H | -1.6548 | -0.1787 | 0.6727  |
| H | -2.5098 | -3.2479 | 1.9417  |
| H | -3.5493 | 0.2068  | 2.1307  |
| H | -7.0352 | -0.3928 | -0.3116 |
| H | -4.1386 | -3.5432 | 0.1007  |

Energy= -3029.020844 a.u.

0 imaginary frequency

### 5@2-cis-A

|   |         |         |         |
|---|---------|---------|---------|
| C | -5.9373 | -0.6802 | -0.4669 |
| C | -4.5891 | -1.1325 | -0.5779 |
| C | -4.3659 | -2.4216 | -1.1584 |
| C | -5.47   | -3.2014 | -1.5869 |
| C | -6.7687 | -2.7207 | -1.4533 |
| C | -7.0002 | -1.4687 | -0.8988 |
| C | -3.4674 | -0.3457 | -0.1412 |
| C | -2.1675 | -0.8552 | -0.3336 |
| C | -1.9731 | -2.1236 | -0.8837 |
| C | -3.046  | -2.8998 | -1.2968 |
| C | -3.4759 | 4.6543  | -0.479  |
| C | -3.709  | 3.4793  | 0.2793  |
| C | -3.4363 | 2.198   | -0.2934 |
| C | -2.9386 | 2.1628  | -1.6296 |
| C | -2.7133 | 3.334   | -2.3466 |
| C | -2.9804 | 4.5712  | -1.7761 |
| C | -4.208  | 3.5573  | 1.5942  |
| C | -4.4372 | 2.4009  | 2.3248  |
| C | -4.1861 | 1.1329  | 1.7929  |
| C | -3.6837 | 1.0093  | 0.4765  |
| N | -1.0507 | -0.1193 | 0.1162  |
| C | 0.1126  | 0.2279  | -0.5146 |
| N | 0.9836  | 0.8119  | 0.3631  |
| S | 0.4298  | -0.0533 | -2.1403 |
| C | 2.3107  | 1.2611  | 0.2206  |
| N | -4.443  | -0.0138 | 2.5866  |
| C | -3.2544 | -0.6244 | 3.1743  |
| C | -5.6154 | -0.0019 | 3.4599  |
| C | 3.2946  | 0.5229  | -0.45   |

|   |         |         |         |
|---|---------|---------|---------|
| C | 4.6105  | 0.9952  | -0.536  |
| C | 4.9394  | 2.2098  | 0.079   |
| C | 3.9725  | 2.9496  | 0.7721  |
| C | 2.6636  | 2.4592  | 0.8449  |
| C | 5.6838  | 0.184   | -1.2642 |
| C | 4.3292  | 4.2657  | 1.4643  |
| F | 6.8715  | 0.3244  | -0.6718 |
| F | 5.3869  | -1.1171 | -1.287  |
| F | 5.7818  | 0.6205  | -2.5192 |
| F | 5.649   | 4.4343  | 1.5717  |
| F | 3.8296  | 5.2801  | 0.7592  |
| F | 3.8062  | 4.2978  | 2.6911  |
| H | -6.1425 | 0.2903  | -0.0399 |
| H | -5.2972 | -4.1755 | -2.0217 |
| H | -7.6032 | -3.3229 | -1.7839 |
| H | -8.0133 | -1.1052 | -0.8014 |
| H | -0.9713 | -2.5134 | -0.9953 |
| H | -2.8743 | -3.875  | -1.7296 |
| H | -3.6777 | 5.6204  | -0.0388 |
| H | -2.7235 | 1.2138  | -2.1    |
| H | -2.3279 | 3.2785  | -3.3549 |
| H | -2.8022 | 5.4729  | -2.3445 |
| H | -4.4072 | 4.526   | 2.0308  |
| H | -4.8111 | 2.4974  | 3.3323  |
| H | -1.2158 | 0.3519  | 0.997   |
| H | 0.566   | 1.0655  | 1.2509  |
| H | -2.9014 | -0.048  | 4.0303  |
| H | -3.4674 | -1.6441 | 3.4978  |
| H | -2.4327 | -0.684  | 2.4621  |
| H | -6.4716 | 0.4484  | 2.9548  |
| H | -5.9034 | -1.0216 | 3.7184  |
| H | -5.4297 | 0.5525  | 4.3809  |
| H | 3.0365  | -0.4246 | -0.9023 |
| H | 5.9559  | 2.5768  | 0.0174  |
| H | 1.9203  | 3.025   | 1.388   |
| C | -0.5531 | 3.9517  | 2.6089  |
| C | -0.3421 | 5.0485  | 3.4532  |
| C | -0.0785 | 6.303   | 2.9088  |
| C | -0.0229 | 6.4603  | 1.5257  |
| C | -0.2328 | 5.3743  | 0.6795  |
| C | -0.4994 | 4.1193  | 1.2188  |
| H | -0.3722 | 4.9462  | 4.5303  |
| H | 0.0874  | 7.1524  | 3.5566  |
| H | 0.1833  | 7.4341  | 1.1048  |
| H | -0.198  | 5.5029  | -0.3933 |
| H | -0.6763 | 3.2888  | 0.5455  |
| C | -0.7948 | 2.612   | 3.2033  |
| O | -0.7675 | 1.5586  | 2.5634  |
| H | -1.0068 | 2.6142  | 4.2731  |

Energy= -2702.335348 a.u.

0 imaginary frequency

### 5@2-trans-A

|   |         |         |         |
|---|---------|---------|---------|
| C | -4.8558 | 1.6925  | -0.1513 |
| C | -3.6399 | 1.3753  | -0.8212 |
| C | -3.0622 | 2.3738  | -1.6749 |
| C | -3.6962 | 3.6396  | -1.7995 |
| C | -4.8641 | 3.9150  | -1.1254 |
| C | -5.4504 | 2.9264  | -0.2999 |
| C | -2.9975 | 0.0948  | -0.6847 |
| C | -1.8568 | -0.1576 | -1.4418 |
| C | -1.3001 | 0.8280  | -2.2994 |
| C | -1.8774 | 2.0685  | -2.3960 |
| C | -3.8137 | -1.4135 | 4.0116  |
| C | -3.9261 | -1.6545 | 2.6153  |
| C | -3.4254 | -0.6881 | 1.6808  |
| C | -2.7909 | 0.4725  | 2.2136  |
| C | -2.6872 | 0.6730  | 3.5723  |
| C | -3.2113 | -0.2719 | 4.4868  |
| C | -4.5090 | -2.8449 | 2.1169  |
| C | -4.5790 | -3.0827 | 0.7676  |
| C | -4.0877 | -2.1407 | -0.1793 |
| C | -3.5329 | -0.9347 | 0.2676  |
| N | -1.3294 | -1.4785 | -1.4586 |
| C | -0.0612 | -1.9228 | -1.2900 |
| N | 0.8527  | -1.0097 | -0.8615 |
| S | 0.2824  | -3.5609 | -1.6276 |
| C | 2.2296  | -1.2170 | -0.5964 |
| N | -4.1056 | -2.4551 | -1.5759 |
| C | -4.2229 | -3.8744 | -1.9247 |
| C | -5.0162 | -1.6473 | -2.4046 |
| C | 3.1308  | -0.2386 | -1.0264 |
| C | 4.4877  | -0.3549 | -0.7229 |
| C | 4.9686  | -1.4534 | -0.0137 |
| C | 4.0628  | -2.4277 | 0.4082  |
| C | 2.6997  | -2.3125 | 0.1368  |
| C | 5.4198  | 0.7524  | -1.1298 |
| C | 4.5517  | -3.5838 | 1.2393  |
| F | 5.1106  | 1.2541  | -2.3458 |
| F | 5.3624  | 1.7951  | -0.2577 |
| F | 6.7072  | 0.3513  | -1.1697 |
| F | 3.8058  | -4.6943 | 1.0516  |
| F | 5.8340  | -3.9031 | 0.9545  |
| F | 4.5055  | -3.3025 | 2.5646  |
| H | -5.3186 | 0.9439  | 0.4810  |
| H | -3.2427 | 4.3852  | -2.4467 |
| H | -5.3416 | 4.8843  | -1.2309 |
| H | -6.3795 | 3.1420  | 0.2189  |
| H | -0.4270 | 0.5782  | -2.8928 |
| H | -1.4504 | 2.8207  | -3.0529 |
| H | -4.2090 | -2.1576 | 4.6980  |
| H | -2.3724 | 1.2059  | 1.5352  |
| H | -2.1943 | 1.5656  | 3.9464  |

|   |         |         |         |
|---|---------|---------|---------|
| H | -3.1276 | -0.0974 | 5.5551  |
| H | -4.9001 | -3.5760 | 2.8192  |
| H | -5.0291 | -4.0031 | 0.4169  |
| H | -2.0324 | -2.1873 | -1.6727 |
| H | 0.5511  | -0.0452 | -0.7097 |
| H | -3.5063 | -4.4665 | -1.3518 |
| H | -5.2332 | -4.2822 | -1.7632 |
| H | -3.9864 | -3.9845 | -2.9864 |
| H | -6.0648 | -1.9538 | -2.2655 |
| H | -4.9288 | -0.5904 | -2.1614 |
| H | -4.7553 | -1.7815 | -3.4581 |
| H | 2.7676  | 0.6145  | -1.5851 |
| H | 6.0249  | -1.5514 | 0.2021  |
| H | 2.0073  | -3.0662 | 0.4837  |
| C | 1.3569  | 6.3783  | 1.3726  |
| C | 2.7513  | 6.3276  | 1.4472  |
| C | 3.4387  | 5.1528  | 1.1152  |
| C | 2.7339  | 4.0252  | 0.7102  |
| C | 1.3304  | 4.0707  | 0.6341  |
| C | 0.6465  | 5.2509  | 0.9649  |
| H | 0.8299  | 7.2913  | 1.6301  |
| H | 3.3067  | 7.2054  | 1.7636  |
| H | 4.5222  | 5.1242  | 1.1738  |
| H | 3.2516  | 3.1095  | 0.4456  |
| H | -0.4381 | 5.2782  | 0.9019  |
| C | 0.5588  | 2.8948  | 0.2081  |
| H | -0.5362 | 3.0419  | 0.1511  |
| O | 1.0524  | 1.8099  | -0.0786 |

Energy = -2702.337656 a.u.

0 imaginary frequency

### 5@3-cis-A

|   |        |         |         |
|---|--------|---------|---------|
| C | 4.7471 | -1.5864 | -0.2778 |
| C | 4.8948 | -2.9055 | -0.8181 |
| C | 6.1811 | -3.5070 | -0.8633 |
| C | 7.2893 | -2.8449 | -0.3854 |
| C | 7.1477 | -1.5471 | 0.1621  |
| C | 3.4473 | -0.9793 | -0.2231 |
| C | 2.3413 | -1.6993 | -0.6787 |
| C | 2.5001 | -3.0027 | -1.2294 |
| C | 3.7408 | -3.5821 | -1.2918 |
| C | 2.1890 | 1.9415  | 3.6349  |
| C | 2.7000 | 1.8161  | 2.3147  |
| C | 2.7681 | 0.5236  | 1.6960  |
| C | 2.3342 | -0.5978 | 2.4622  |
| C | 1.8480 | -0.4447 | 3.7418  |
| C | 1.7662 | 0.8370  | 4.3379  |
| C | 3.1677 | 2.9403  | 1.5903  |
| C | 3.6646 | 2.8033  | 0.3179  |

|   |         |         |         |
|---|---------|---------|---------|
| C | 3.7312  | 1.5319  | -0.3255 |
| C | 3.2936  | 0.3917  | 0.3650  |
| N | 1.0691  | -1.0867 | -0.6534 |
| C | -0.1453 | -1.7402 | -0.5442 |
| N | -1.2134 | -0.8553 | -0.5438 |
| O | -0.2729 | -2.9611 | -0.4682 |
| C | -2.5682 | -1.1612 | -0.3982 |
| N | 4.2817  | 1.4244  | -1.6294 |
| C | 3.3654  | 1.0560  | -2.7104 |
| C | 5.2036  | 2.4734  | -2.0493 |
| C | -3.4843 | -0.1185 | -0.6108 |
| C | -4.8489 | -0.3198 | -0.4211 |
| C | -5.3438 | -1.5679 | -0.0479 |
| C | -4.4326 | -2.6099 | 0.1314  |
| C | -3.0600 | -2.4261 | -0.0316 |
| C | -5.7719 | 0.8581  | -0.5787 |
| C | -4.9460 | -3.9867 | 0.4608  |
| F | -5.6546 | 1.7232  | 0.4631  |
| F | -5.4941 | 1.5689  | -1.6957 |
| F | -7.0683 | 0.4928  | -0.6422 |
| F | -4.0616 | -4.6998 | 1.1926  |
| F | -6.1033 | -3.9418 | 1.1587  |
| F | -5.1952 | -4.7079 | -0.6597 |
| H | 6.2715  | -4.5064 | -1.2809 |
| H | 8.2679  | -3.3138 | -0.4226 |
| H | 8.0214  | -1.0288 | 0.5467  |
| H | 1.6266  | -3.5271 | -1.5888 |
| H | 3.8511  | -4.5767 | -1.7153 |
| H | 2.1428  | 2.9319  | 4.0804  |
| H | 2.3955  | -1.5886 | 2.0269  |
| H | 1.5243  | -1.3179 | 4.3009  |
| H | 1.3771  | 0.9423  | 5.3461  |
| H | 3.1229  | 3.9224  | 2.0539  |
| H | 4.0048  | 3.6839  | -0.2139 |
| H | 1.0620  | -0.0760 | -0.5437 |
| H | -0.9943 | 0.1349  | -0.6185 |
| H | 2.7248  | 0.2276  | -2.4152 |
| H | 2.7252  | 1.9010  | -3.0166 |
| H | 3.9459  | 0.7389  | -3.5824 |
| H | 5.7570  | 2.1180  | -2.9241 |
| H | 4.7067  | 3.4166  | -2.3347 |
| H | 5.9234  | 2.6860  | -1.2557 |
| H | -3.1247 | 0.8530  | -0.9306 |
| H | -6.4045 | -1.7239 | 0.0976  |
| H | -2.3693 | -3.2407 | 0.1244  |
| C | 5.9143  | -0.9354 | 0.2132  |
| H | 5.8213  | 0.0568  | 0.6389  |
| C | -0.8314 | 5.3099  | -0.7444 |
| C | -1.0180 | 3.9536  | -0.4325 |
| C | -2.2479 | 3.5196  | 0.0920  |
| C | -3.2846 | 4.4256  | 0.2783  |
| C | -3.0958 | 5.7751  | -0.0467 |

|   |         |        |         |
|---|---------|--------|---------|
| C | -1.8707 | 6.2183 | -0.5525 |
| H | 0.1226  | 5.6436 | -1.1431 |
| H | -2.3705 | 2.4770 | 0.3607  |
| H | -4.2376 | 4.0823 | 0.6672  |
| H | -3.9065 | 6.4826 | 0.0984  |
| H | -1.7297 | 7.2659 | -0.7975 |
| C | 0.0776  | 3.0099 | -0.6799 |
| O | -0.0052 | 1.7895 | -0.5630 |
| H | 1.0340  | 3.4617 | -0.9968 |

Energy = -2379.389386 a.u.

0 imaginary frequency

### 5@3-trans-A

|   |         |         |         |
|---|---------|---------|---------|
| C | -5.0016 | 0.5544  | -1.0595 |
| C | -3.6526 | 0.2706  | -1.4181 |
| C | -3.0941 | 0.9785  | -2.5341 |
| C | -3.8800 | 1.9460  | -3.2161 |
| C | -5.1767 | 2.2032  | -2.8321 |
| C | -5.7412 | 1.4925  | -1.7466 |
| C | -2.8562 | -0.7003 | -0.7153 |
| C | -1.5753 | -0.9838 | -1.1892 |
| C | -1.0365 | -0.2881 | -2.3066 |
| C | -1.7674 | 0.6806  | -2.9449 |
| C | -4.2275 | -0.4087 | 4.0848  |
| C | -4.0658 | -1.1887 | 2.9076  |
| C | -3.5600 | -0.5807 | 1.7107  |
| C | -3.2009 | 0.7977  | 1.7778  |
| C | -3.3587 | 1.5254  | 2.9365  |
| C | -3.8869 | 0.9237  | 4.1040  |
| C | -4.3770 | -2.5701 | 2.8902  |
| C | -4.1820 | -3.3198 | 1.7581  |
| C | -3.6789 | -2.7396 | 0.5595  |
| C | -3.3886 | -1.3697 | 0.5194  |
| N | -0.8651 | -2.0615 | -0.6134 |
| C | 0.4786  | -2.2524 | -0.3877 |
| N | 1.2559  | -1.1052 | -0.3558 |
| O | 0.9216  | -3.3859 | -0.1903 |
| C | 2.6446  | -1.0558 | -0.1686 |
| N | -3.4117 | -3.5684 | -0.5756 |
| C | -4.2661 | -3.3459 | -1.7531 |
| C | -3.2568 | -5.0026 | -0.3194 |
| C | 3.4897  | -2.1700 | -0.3019 |
| C | 4.8644  | -2.0210 | -0.1143 |
| C | 5.4345  | -0.7882 | 0.2000  |
| C | 4.5874  | 0.3129  | 0.3267  |
| C | 3.2128  | 0.1897  | 0.1471  |
| C | 5.7532  | -3.2188 | -0.3167 |
| C | 5.1617  | 1.6731  | 0.6148  |



|   |         |         |         |
|---|---------|---------|---------|
| F | 5.1581  | -4.3675 | 0.0763  |
| F | 6.0840  | -3.3820 | -1.6220 |
| F | 6.9147  | -3.1126 | 0.3673  |
| F | 4.3298  | 2.4247  | 1.3787  |
| F | 6.3432  | 1.6008  | 1.2650  |
| F | 5.3815  | 2.3787  | -0.5209 |
| H | -5.4503 | 0.0156  | -0.2330 |
| H | -3.4372 | 2.4749  | -4.0559 |
| H | -5.7695 | 2.9419  | -3.3628 |
| H | -6.7690 | 1.6860  | -1.4543 |
| H | -0.0446 | -0.5477 | -2.6595 |
| H | -1.3487 | 1.2065  | -3.7982 |
| H | -4.6208 | -0.8924 | 4.9751  |
| H | -2.7850 | 1.2777  | 0.9009  |
| H | -3.0711 | 2.5725  | 2.9553  |
| H | -4.0115 | 1.5110  | 5.0086  |
| H | -4.7715 | -3.0345 | 3.7899  |
| H | -4.4284 | -4.3743 | 1.7748  |
| H | -1.4234 | -2.9106 | -0.5260 |
| H | 0.7788  | -0.2063 | -0.3116 |
| H | -4.3789 | -2.2829 | -1.9556 |
| H | -3.8037 | -3.8161 | -2.6258 |
| H | -5.2664 | -3.7851 | -1.6130 |
| H | -2.5777 | -5.1678 | 0.5197  |
| H | -4.2090 | -5.5161 | -0.1119 |
| H | -2.8195 | -5.4628 | -1.2097 |
| H | 3.0660  | -3.1372 | -0.5249 |
| H | 6.5011  | -0.6912 | 0.3552  |
| H | 2.5679  | 1.0525  | 0.2620  |
| C | 1.4384  | 4.5496  | 0.5057  |
| C | 0.2322  | 4.2082  | -0.1317 |
| C | -0.6482 | 5.2168  | -0.5542 |
| C | -0.3314 | 6.5563  | -0.3385 |
| C | 0.8676  | 6.8896  | 0.2964  |
| C | 1.7519  | 5.8875  | 0.7162  |
| H | 2.1176  | 3.7644  | 0.8202  |
| H | -1.5772 | 4.9448  | -1.0484 |
| H | -1.0121 | 7.3367  | -0.6630 |
| H | 1.1172  | 7.9330  | 0.4642  |
| H | 2.6826  | 6.1570  | 1.2055  |
| C | -0.1334 | 2.8056  | -0.3717 |
| O | 0.5325  | 1.8385  | -0.0169 |
| H | -1.0834 | 2.6506  | -0.9158 |

-----  
 Energy = -2379.387225 a.u.  
 0 imaginary frequency

### 5@8-cis-cis

|   |         |         |         |
|---|---------|---------|---------|
| C | -5.3193 | -2.3246 | -0.0787 |
|---|---------|---------|---------|

|   |         |         |         |
|---|---------|---------|---------|
| C | -4.1876 | -2.1463 | 0.7693  |
| C | -4.4235 | -1.7955 | 2.1396  |
| C | -5.7569 | -1.6476 | 2.6060  |
| C | -6.8282 | -1.8287 | 1.7592  |
| C | -6.6011 | -2.1684 | 0.4031  |
| C | -2.8442 | -2.2875 | 0.2945  |
| C | -1.7774 | -2.0407 | 1.1649  |
| C | -2.0208 | -1.7084 | 2.5273  |
| C | -3.3067 | -1.5980 | 2.9922  |
| N | -0.4739 | -2.0791 | 0.6434  |
| C | 0.7318  | -1.9280 | 1.3051  |
| N | 1.7481  | -1.6064 | 0.4151  |
| O | 0.8868  | -2.0691 | 2.5157  |
| C | 3.1204  | -1.5502 | 0.6767  |
| C | 3.6944  | -1.8972 | 1.9095  |
| C | 5.0799  | -1.8340 | 2.0669  |
| C | 5.9184  | -1.4315 | 1.0305  |
| C | 5.3389  | -1.0817 | -0.1910 |
| C | 3.9616  | -1.1380 | -0.3728 |
| C | 5.6771  | -2.2768 | 3.3763  |
| C | 6.2311  | -0.6038 | -1.3061 |
| F | 5.8609  | -3.6196 | 3.4128  |
| F | 6.8844  | -1.7124 | 3.6016  |
| F | 4.8845  | -1.9664 | 4.4267  |
| F | 6.6492  | 0.6690  | -1.1068 |
| F | 7.3491  | -1.3620 | -1.4035 |
| F | 5.6177  | -0.6363 | -2.5078 |
| H | -5.1631 | -2.5831 | -1.1203 |
| H | -5.9154 | -1.3853 | 3.6487  |
| H | -7.8436 | -1.7144 | 2.1259  |
| H | -7.4467 | -2.3072 | -0.2641 |
| H | -1.1770 | -1.5509 | 3.1836  |
| H | -3.4805 | -1.3418 | 4.0337  |
| H | -0.4196 | -2.1258 | -0.3663 |
| H | 1.4495  | -1.2653 | -0.4974 |
| H | 3.0585  | -2.1977 | 2.7285  |
| H | 6.9915  | -1.3901 | 1.1685  |
| H | 3.5368  | -0.8698 | -1.3333 |
| C | -3.1325 | -5.0945 | -0.5899 |
| C | -2.7188 | -4.0873 | -1.5054 |
| C | -2.4128 | -4.4786 | -2.8506 |
| C | -2.5503 | -5.8411 | -3.2285 |
| C | -2.9619 | -6.7887 | -2.3186 |
| C | -3.2501 | -6.4091 | -0.9864 |
| C | -2.5771 | -2.7085 | -1.1195 |
| C | -2.1434 | -1.7884 | -2.0667 |
| C | -1.8354 | -2.1852 | -3.3946 |
| C | -1.9672 | -3.4956 | -3.7749 |
| N | -2.0175 | -0.4112 | -1.7246 |
| C | -0.8010 | 0.2154  | -1.6976 |
| N | -0.8900 | 1.5642  | -1.4099 |
| O | 0.2662  | -0.3830 | -1.9106 |

|   |         |         |         |
|---|---------|---------|---------|
| C | 0.1577  | 2.4682  | -1.2035 |
| C | 1.5020  | 2.1750  | -1.4781 |
| C | 2.4814  | 3.1378  | -1.2390 |
| C | 2.1608  | 4.4039  | -0.7521 |
| C | 0.8195  | 4.6934  | -0.4983 |
| C | -0.1736 | 3.7421  | -0.7137 |
| C | 3.9267  | 2.7703  | -1.4493 |
| C | 0.4468  | 6.0332  | 0.0784  |
| F | 4.0769  | 1.8047  | -2.3849 |
| F | 4.6702  | 3.8292  | -1.8382 |
| F | 4.4838  | 2.2986  | -0.3078 |
| F | 1.2776  | 7.0117  | -0.3434 |
| F | -0.8113 | 6.3983  | -0.2550 |
| F | 0.5056  | 6.0280  | 1.4321  |
| H | -3.3530 | -4.8170 | 0.4343  |
| H | -2.3193 | -6.1218 | -4.2525 |
| H | -3.0618 | -7.8275 | -2.6180 |
| H | -3.5659 | -7.1614 | -0.2700 |
| H | -1.5050 | -1.4295 | -4.0986 |
| H | -1.7361 | -3.7966 | -4.7927 |
| H | -2.8261 | 0.0840  | -1.3470 |
| H | -1.8233 | 1.9205  | -1.2272 |
| H | 1.7628  | 1.2096  | -1.8814 |
| H | 2.9297  | 5.1478  | -0.5863 |
| H | -1.2093 | 3.9889  | -0.5070 |
| C | -5.0154 | 4.0886  | 0.2561  |
| C | -6.6187 | 2.6148  | 1.3459  |
| C | -7.2695 | 3.7221  | 1.8851  |
| C | -6.7946 | 5.0068  | 1.6079  |
| C | -5.6693 | 5.1905  | 0.7934  |
| H | -8.1415 | 3.5878  | 2.5168  |
| H | -7.3022 | 5.8706  | 2.0263  |
| H | -5.3104 | 6.1929  | 0.5830  |
| C | -5.4883 | 2.7931  | 0.5314  |
| H | -6.9751 | 1.6096  | 1.5549  |
| H | -4.1456 | 4.2096  | -0.3808 |
| C | -4.8225 | 1.6096  | -0.0170 |
| O | -3.8025 | 1.6352  | -0.7056 |
| H | -5.2973 | 0.6415  | 0.2196  |

-----  
 Energy = -3374.636198 a.u.  
 0 imaginary frequency

### (5)<sub>2</sub>@8-cis-cis

|   |         |        |         |
|---|---------|--------|---------|
| C | -1.6940 | 5.4372 | -0.0316 |
| C | -1.2383 | 4.4668 | -0.9693 |
| C | -1.8049 | 4.4872 | -2.2861 |
| C | -2.7769 | 5.4696 | -2.6163 |
| C | -3.1908 | 6.3967 | -1.6853 |

|   |         |         |         |
|---|---------|---------|---------|
| C | -2.6438 | 6.3730  | -0.3800 |
| C | -0.2567 | 3.4751  | -0.6326 |
| C | 0.1231  | 2.5345  | -1.5925 |
| C | -0.4434 | 2.5661  | -2.8985 |
| C | -1.3772 | 3.5144  | -3.2272 |
| N | 1.1223  | 1.5962  | -1.2713 |
| C | 1.2362  | 0.3205  | -1.7940 |
| N | 2.3227  | -0.3590 | -1.2659 |
| O | 0.4673  | -0.1578 | -2.6261 |
| C | 2.7559  | -1.6481 | -1.5829 |
| C | 3.7838  | -2.1871 | -0.7928 |
| C | 4.3201  | -3.4395 | -1.0802 |
| C | 3.8270  | -4.2046 | -2.1353 |
| C | 2.7815  | -3.6794 | -2.8966 |
| C | 2.2450  | -2.4179 | -2.6422 |
| C | 5.4725  | -3.9281 | -0.2449 |
| C | 2.2626  | -4.4634 | -4.0731 |
| F | 6.6059  | -3.2256 | -0.5075 |
| F | 5.2326  | -3.7820 | 1.0782  |
| F | 5.7549  | -5.2281 | -0.4647 |
| F | 2.3922  | -5.7967 | -3.8901 |
| F | 0.9568  | -4.2145 | -4.3157 |
| F | 2.9346  | -4.1600 | -5.2111 |
| H | -1.2857 | 5.4315  | 0.9727  |
| H | -3.1889 | 5.4743  | -3.6220 |
| H | -3.9338 | 7.1436  | -1.9475 |
| H | -2.9762 | 7.1007  | 0.3543  |
| H | -0.1239 | 1.8304  | -3.6225 |
| H | -1.7967 | 3.5333  | -4.2293 |
| H | 1.7403  | 1.8444  | -0.5035 |
| H | 2.9106  | 0.1504  | -0.6105 |
| H | 4.1547  | -1.6266 | 0.0584  |
| H | 4.2355  | -5.1834 | -2.3494 |
| H | 1.4382  | -2.0259 | -3.2428 |
| C | 1.8850  | 5.3535  | 0.1435  |
| C | 1.3860  | 4.3997  | 1.0761  |
| C | 1.9567  | 4.3838  | 2.3912  |
| C | 2.9757  | 5.3160  | 2.7248  |
| C | 3.4309  | 6.2289  | 1.7989  |
| C | 2.8796  | 6.2405  | 0.4952  |
| C | 0.3583  | 3.4571  | 0.7350  |
| C | -0.0622 | 2.5287  | 1.6894  |
| C | 0.5067  | 2.5261  | 2.9946  |
| C | 1.4852  | 3.4265  | 3.3273  |
| N | -1.1025 | 1.6364  | 1.3659  |
| C | -1.2529 | 0.3558  | 1.8675  |
| N | -2.3692 | -0.2769 | 1.3439  |
| O | -0.4892 | -0.1627 | 2.6800  |
| C | -2.8395 | -1.5575 | 1.6412  |
| C | -2.3325 | -2.3702 | 2.6702  |
| C | -2.9060 | -3.6191 | 2.9055  |
| C | -3.9843 | -4.0905 | 2.1544  |

|   |         |         |         |
|---|---------|---------|---------|
| C | -4.4737 | -3.2829 | 1.1301  |
| C | -3.9024 | -2.0416 | 0.8626  |
| C | -2.3906 | -4.4494 | 4.0514  |
| C | -5.6508 | -3.7136 | 0.2975  |
| F | -1.0756 | -4.2412 | 4.2816  |
| F | -3.0387 | -4.1623 | 5.2074  |
| F | -2.5575 | -5.7732 | 3.8322  |
| F | -5.3855 | -3.6347 | -1.0267 |
| F | -6.0346 | -4.9791 | 0.5589  |
| F | -6.7291 | -2.9161 | 0.5183  |
| H | 1.4740  | 5.3744  | -0.8595 |
| H | 3.3910  | 5.2934  | 3.7289  |
| H | 4.2094  | 6.9376  | 2.0640  |
| H | 3.2442  | 6.9566  | -0.2352 |
| H | 0.1538  | 1.8021  | 3.7149  |
| H | 1.9070  | 3.4192  | 4.3286  |
| H | -1.7183 | 1.9180  | 0.6079  |
| H | -2.9468 | 0.2619  | 0.7030  |
| H | -1.5006 | -2.0205 | 3.2625  |
| H | -4.4212 | -5.0600 | 2.3536  |
| H | -4.2741 | -1.4460 | 0.0362  |
| C | -6.3957 | 0.7224  | -0.5851 |
| C | -6.7366 | 2.6934  | -1.9670 |
| C | -8.0289 | 2.2622  | -2.2597 |
| C | -8.4991 | 1.0619  | -1.7198 |
| C | -7.6831 | 0.2922  | -0.8806 |
| H | -8.6673 | 2.8555  | -2.9062 |
| H | -9.5049 | 0.7244  | -1.9508 |
| H | -8.0484 | -0.6412 | -0.4651 |
| C | -5.9103 | 1.9223  | -1.1335 |
| H | -6.3589 | 3.6223  | -2.3855 |
| H | -5.7609 | 0.1455  | 0.0764  |
| C | -4.5440 | 2.3872  | -0.8694 |
| O | -3.6969 | 1.7648  | -0.2325 |
| H | -4.2860 | 3.3719  | -1.2966 |
| C | 6.4074  | 0.5527  | 0.4585  |
| C | 6.9346  | 2.6078  | 1.6453  |
| C | 8.2474  | 2.1716  | 1.8129  |
| C | 8.6352  | 0.9272  | 1.3084  |
| C | 7.7154  | 0.1175  | 0.6295  |
| H | 8.9656  | 2.7953  | 2.3349  |
| H | 9.6573  | 0.5862  | 1.4421  |
| H | 8.0164  | -0.8501 | 0.2413  |
| C | 6.0057  | 1.7981  | 0.9719  |
| H | 6.6212  | 3.5714  | 2.0376  |
| H | 5.6902  | -0.0565 | -0.0776 |
| C | 4.6245  | 2.2726  | 0.8318  |
| O | 3.7062  | 1.6314  | 0.3255  |
| H | 4.4257  | 3.2836  | 1.2285  |

Energy = -3720.230942 a.u.

0 imaginary frequency

## Derivative 5

|   |         |        |         |
|---|---------|--------|---------|
| C | 1.4385  | 4.5497 | 0.5057  |
| C | 0.2323  | 4.2082 | -0.1318 |
| C | -0.6482 | 5.2168 | -0.5543 |
| C | -0.3314 | 6.5564 | -0.3386 |
| C | 0.8677  | 6.8897 | 0.2964  |
| C | 1.752   | 5.8876 | 0.7163  |
| H | 2.1176  | 3.7644 | 0.8203  |
| H | -1.5772 | 4.9449 | -1.0485 |
| H | -1.0121 | 7.3368 | -0.663  |
| H | 1.1173  | 7.933  | 0.4643  |
| H | 2.6826  | 6.1571 | 1.2055  |
| C | -0.1335 | 2.8057 | -0.3718 |
| O | 0.5326  | 1.8386 | -0.017  |
| H | -1.0834 | 2.6507 | -0.9159 |

Energy = -345.588295 a.u.

0 imaginary frequency

## NCI studies

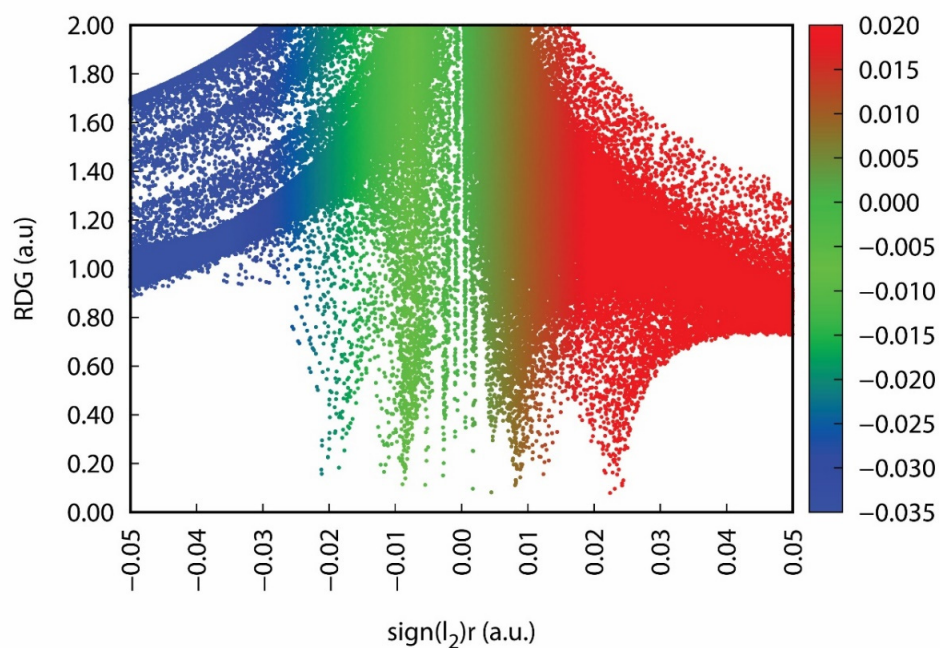

**Figure S32.** Plot of RDG versus  $\text{sign}(I_2)r$  for **5@2-trans-A** complex (NCI-RDG isosurfaces with  $S = 0.5$ ).

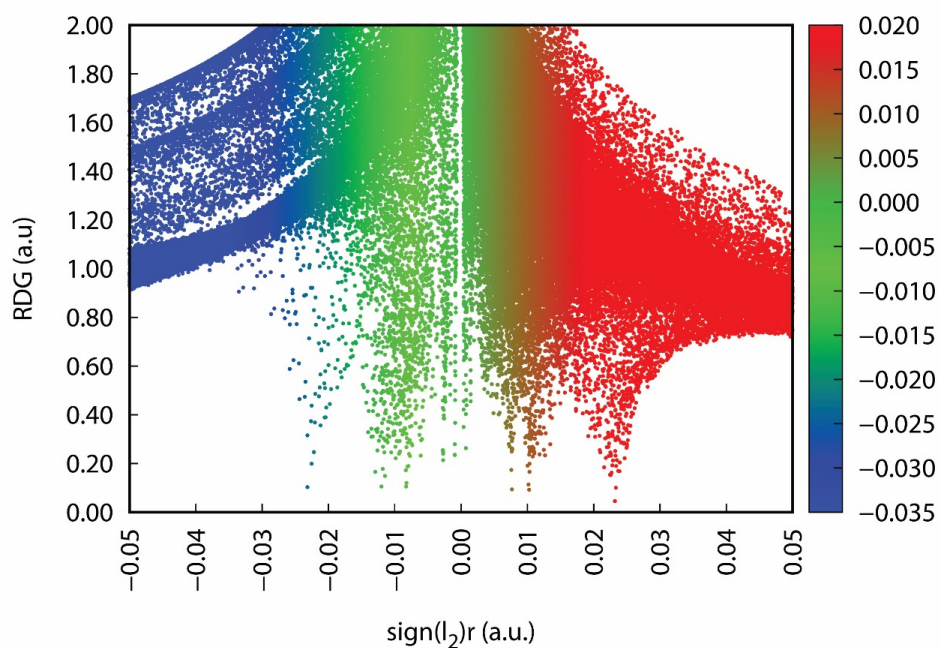

**Figure S33.** Plot of RDG versus  $\text{sign}(I_2)r$  for **5@3-cis-A** complex (NCI-RDG isosurfaces with  $S = 0.5$ ).

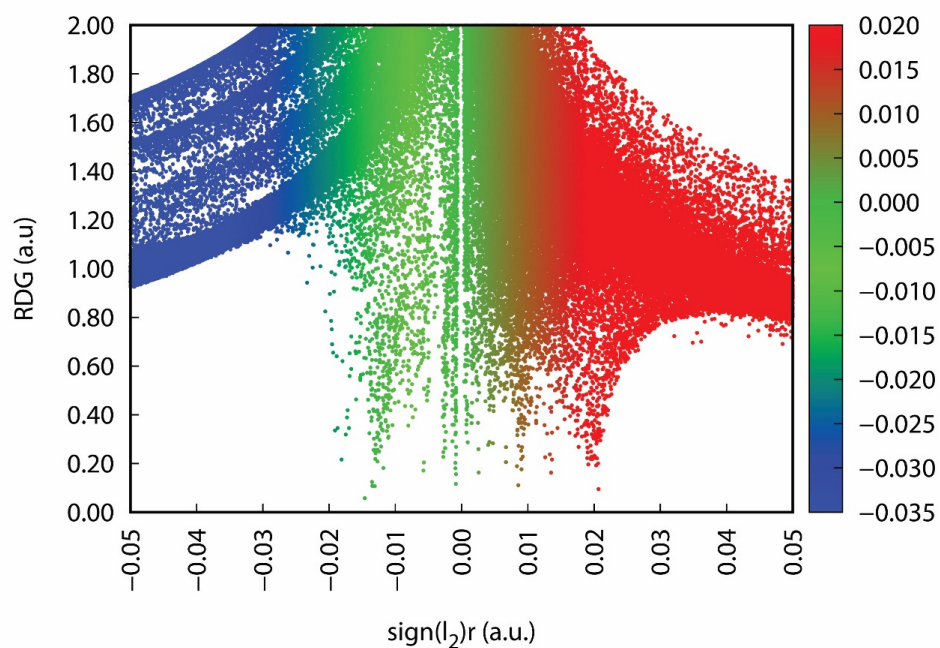

**Figure S34.** Plot of RDG versus sign( $I_2$ ) $r$  for **5**@**8-cis-cis** 1:1 complex (NCI-RDG isosurfaces with  $S = 0.5$ ).

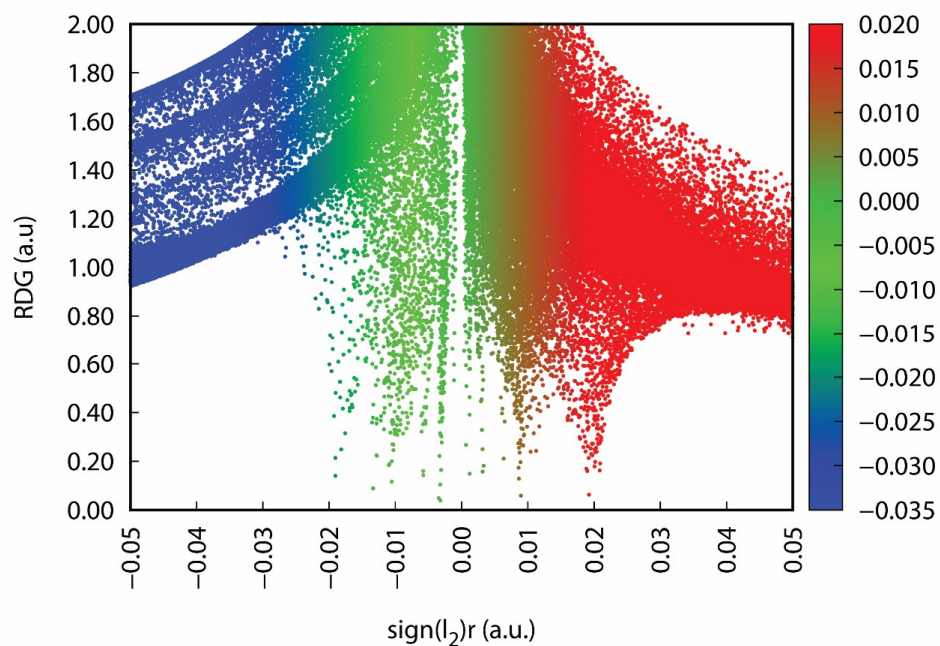

**Figure S35.** Plot of RDG versus sign( $I_2$ ) $r$  for **(5)<sub>2</sub>**@**8-cis-cis** 1:2 complex (NCI-RDG isosurfaces with  $S = 0.5$ ).

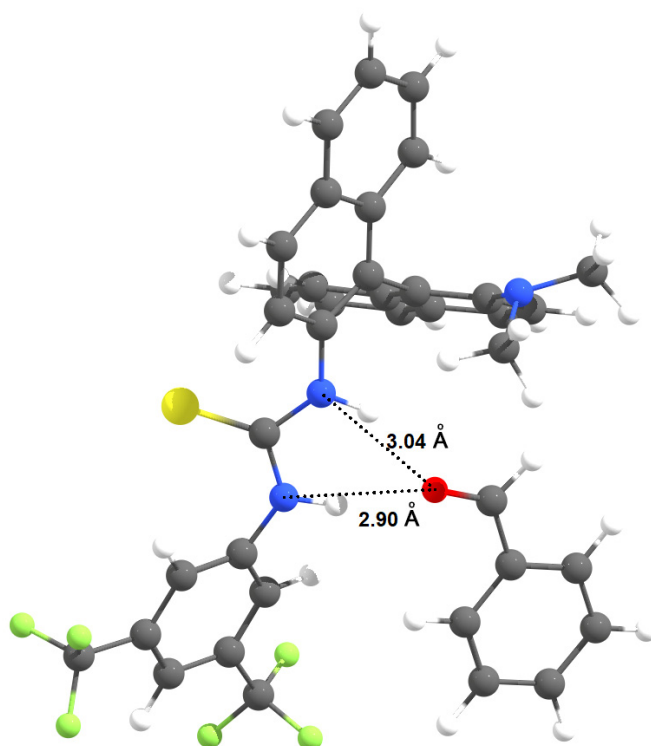

**Figure S36.** DFT optimized structure of **5@2-cis-A** complex.

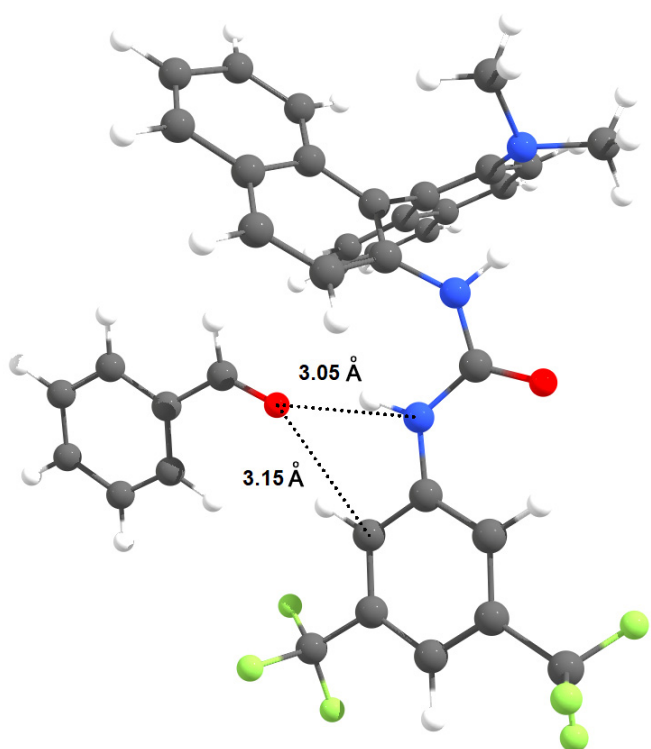

**Figure S37.** DFT optimized structure of **5@3-trans-A** complex.

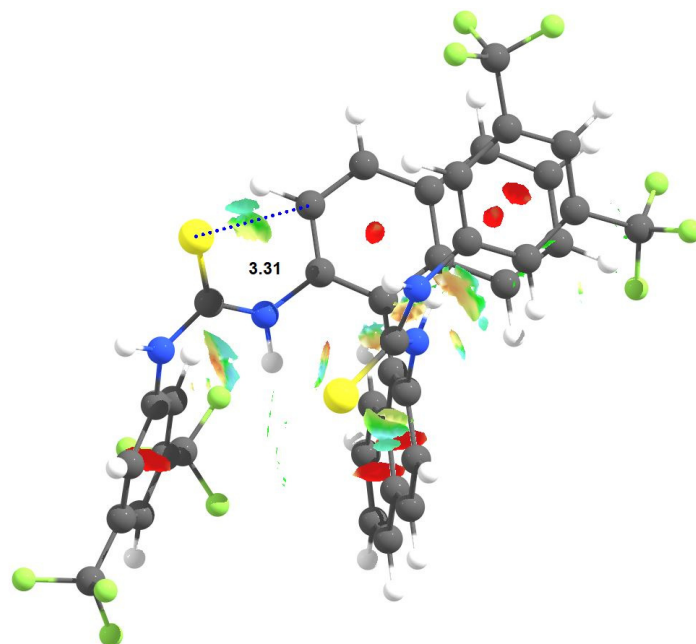

**Figure S38.** Non-covalent interaction plots by the sign of the second Hessian eigenvalue (gradient isosurfaces  $s = 0.5$  a.u.) of **7-trans-trans**.

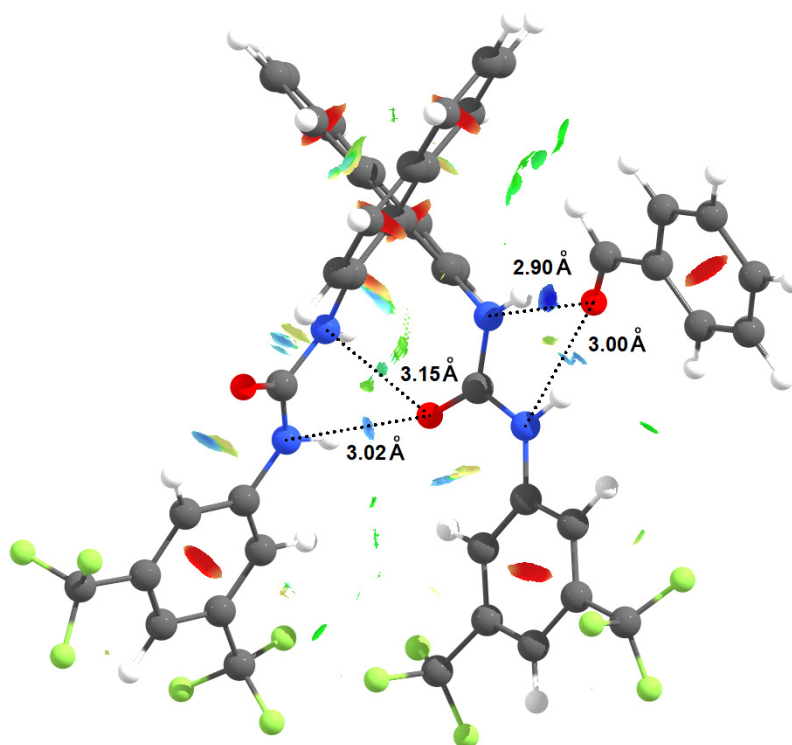

**Figure S39.** Gradient RDG isosurfaces (0.5) for the noncovalent interaction (NCI) regions in **5@8-cis-cis** 1:1 complex.



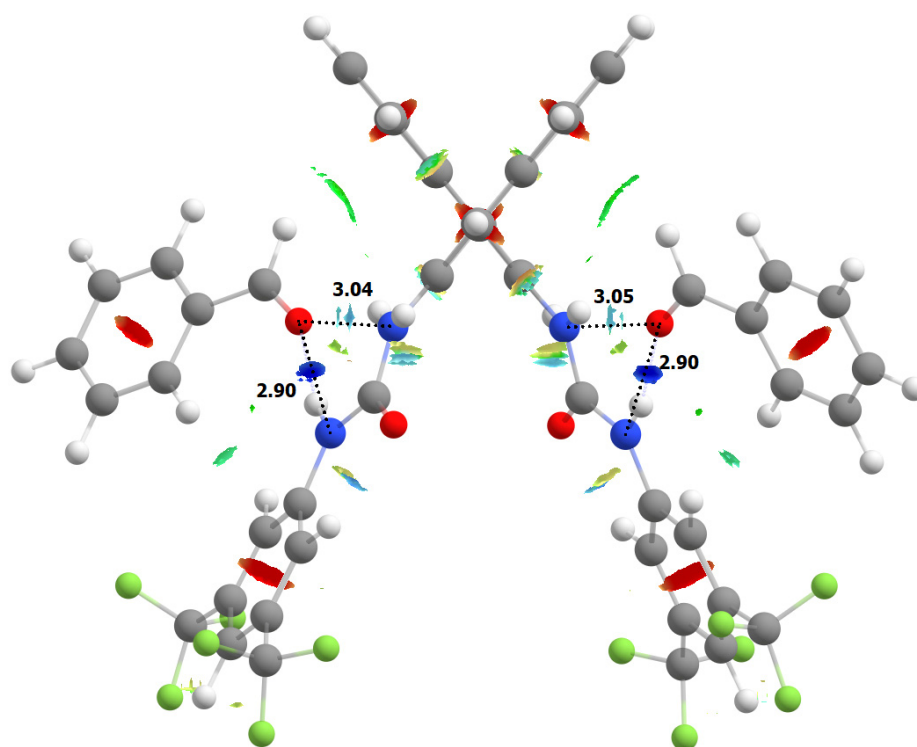

**Figure S40.** Gradient RDG isosurfaces (0.5) for the noncovalent interaction (NCI) regions in **(5)<sub>2</sub>@8-cis-cis** 1:2 complex.
